# Supplementary material
Source: PubMed Central journal article supplement (PMC4688008)
Supplement: NIHMS744636-supplement-Supporting_Information.pdf [file NIHMS744636-supplement-Supporting_Information.pdf]

# Supporting Information

## **Ruthenium Catalyzed Diastereo- and Enantioselective Coupling of Propargyl Ethers with Alcohols: Siloxy-Crotylation *via* Hydride Shift Enabled Conversion of Alkynes to $\pi$ -Allyls**

Tao Liang, Wandu Zhang, Te-Yu Chen, Khoa D. Nguyen and Michael J. Krische\*

*University of Texas at Austin, Department of Chemistry,  
Austin, TX 78712, USA*

### Table of Contents:

|      |                                                                                                                                                                                                                                        |      |
|------|----------------------------------------------------------------------------------------------------------------------------------------------------------------------------------------------------------------------------------------|------|
| I.   | General Information                                                                                                                                                                                                                    | S2   |
| II.  | Spectroscopy, Spectrometry, and Data Collection                                                                                                                                                                                        | S2   |
| III. | Experimental Details and Spectral Data                                                                                                                                                                                                 |      |
| A.   | Key Optimization experiments                                                                                                                                                                                                           | S3   |
| B.   | General Procedure for the Coupling of Alcohols <b>2a-2o</b> and Alkynes                                                                                                                                                                | S3   |
| C.   | General Procedure for Conversion of Alcohols <b>5a</b> , <b>5c</b> , <b>5e</b> , <b>5f</b> , <b>5k</b> and <b>5m</b> to <i>trans</i> -2,3-disubstituted furans <b>6a</b> , <b>6c</b> , <b>6e</b> , <b>6f</b> , <b>6k</b> and <b>6m</b> | S56  |
| D.   | General Procedure for Conversion of Alcohols <b>2a</b> , <b>2l</b> , <b>2p</b> to <i>trans</i> -4,5-disubstituted lactones <b>7a</b> , <b>7l</b> and <b>7p</b>                                                                         | S75  |
| E.   | Formation of <i>trans</i> -4,5-disubstituted-2,3-dehydrofuran <b>8a</b>                                                                                                                                                                | S85  |
| F.   | Formation of <b>9a</b>                                                                                                                                                                                                                 | S88  |
| G.   | Crystallographic Material for Coupling product <b>5c</b>                                                                                                                                                                               | S91  |
| H.   | Isotopic Labeling Studies                                                                                                                                                                                                              | S102 |

## **I. General Information:**

All reactions were run under an atmosphere of argon, unless otherwise indicated. Resealable pressure tubes (13x100 mm) were purchased from Fischer Scientific (catalog number 14-959-35C) and were flame dried followed by cooling in a desiccator or under a stream of argon prior to use. Tetrahydrofuran (THF) was dried over sodium metal, benzophenone, and distilled immediately prior to use.  $\text{RuH}_2(\text{CO})(\text{PPh}_3)_3$  and all ligands were used as received from Strem Chemicals Inc. Alcohols were purified by distillation or recrystallization immediately prior to use. Preparative column chromatography was employing Silicycle silica gel (40-63  $\mu\text{m}$ ). Analytical thin-layer chromatography (TLC) was carried out using 0.25 mm commercial silica gel plates (Dynamic Absorbents F<sub>254</sub>). Visualization was accomplished with UV light followed by dipping in Seebach's stain solution then heating. Purification of reactions was carried out by flash chromatography using Silicycle silica gel (40-63  $\mu\text{m}$ ). Specific optical rotations were recorded on an Atago AP-300 automatic polarimeter at the sodium line (589.3 nm) in  $\text{CHCl}_3$ . Solution concentrations are given in the units of  $10^{-2}$  g  $\text{mL}^{-1}$ .

## **II. Spectroscopy, Spectrometry, and Data Collection:**

Infrared spectra were recorded on a Perkin-Elmer 1600 spectrometer. Low-resolution mass spectra (LRMS) were obtained on a Karatos MS9 and are reported as  $m/z$  (relative intensity). Accurate masses are reported for the molecular ion ( $\text{M}+\text{H}$ ,  $\text{M}+\text{Na}$ ), or a suitable fragment ion. Proton nuclear magnetic resonance ( $^1\text{H}$  NMR) spectra were recorded with a Varian Gemini (400 MHz) spectrometer. Chemical shifts are reported in delta ( $\delta$ ) units, parts per million (ppm) downfield from tetramethylsilane or ppm relative to the center of the singlet at 7.26 ppm for deuteriochloroform. Data reported as multiplicity (s = singlet, d = doublet, t = triplet, q = quartet, m = multiplet). Integration and coupling constants were reported in Hertz (Hz). Carbon-13 nuclear magnetic resonance ( $^{13}\text{C}$  NMR) spectra were recorded with a Varian Gemini (100 MHz) spectrometer and were routinely run with broadband decoupling. Chemical shifts are reported in delta ( $\delta$ ) units, ppm relative to the center of the triplet at 77.16 ppm for deuteriochloroform.

### III. Experimental Details and Spectral Data

#### A. Key optimization experiments

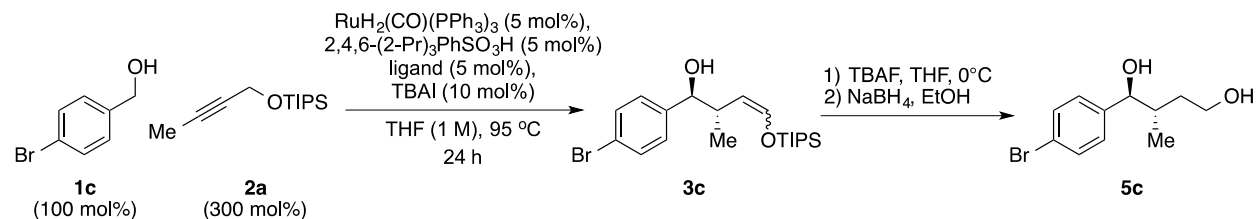

| Entry            | Ligand      | 3c Z:E | Z ee %, E ee % | 5c Yield % | 5c ee % |
|------------------|-------------|--------|----------------|------------|---------|
| 1                | dppf        | 1.3:1  |                | 29         | -       |
| 2                | (R)-BINAP   | 2:1    |                | 17         | 93      |
| 3                | (R)-SEGPPOS | 2:1    |                | 13         | 96      |
| 4                | SL-J009-1   | 3:1    | 87, 94         | 70         | 88      |
| 5                | SL-J002-1   | 2.3:1  |                | 49         | 77      |
| 6                | SL-J003-1   | 3:1    |                | 90         | 66      |
| 7 <sup>a,b</sup> | SL-J009-1   | 3:1    | 90, 96         | 77         | 92      |
| 8 <sup>a,c</sup> | SL-J009-1   | 3:1    |                | 72         | 90      |

<sup>a</sup>7.5 mol% 2,4,6-(2-Pr)<sub>3</sub>PhSO<sub>3</sub>H. <sup>b</sup>85 °C. <sup>c</sup>75 °C.

#### B. General Procedure for the Couplings of Alcohols 2a-2o and Alkyne 1a-1c

To a resealable pressure tube (ca. 13 x 100) was added  $\text{H}_2\text{Ru}(\text{CO})(\text{PPh}_3)_3$  (9.2 mg, 0.010 mmol, 5 mol%), SL-J009-1 ligand (5.6 mg, 0.010 mmol, 5 mol%),  $\text{Bu}_4\text{NI}$  (7.4 mg, 0.020 mmol, 10 mol%) and 2,4,6-tri(2-propyl)phenylsulfonic acid (4.2 mg, 0.015 mmol, 7.5 mol%). At this stage solid alcohol coupling partners (0.20 mmol, 100 mol%) were added. The tube was then sealed with a rubber septum and purged with argon. THF (0.20 mL, 1 M concentration with respect to alcohols) was then added. At this stage, liquid alcohol coupling partners (0.20 mmol, 100 mol%) were added. 2-propylalcohol (31  $\mu\text{L}$ , 0.40 mmol, 200 mol%) was then added. Alkyne 1a (0.60 mmol, 300 mol%) was added *via* syringe and the rubber septum was quickly replaced with a screw cap. The mixture was then heated at 85 °C for the time stated. After cooling to room temperature, the mixture was passed through a short silica pad, washed the pad with EA, and concentrated *in vacuo*. The residue was dissolved in THF (2.0 mL) and TBAF (1.0 M in THF, 0.2 mL) was added at 0 °C. The mixture was stirred at r.t for 30 min, then  $\text{NaBH}_4$  (14.8 mg, 0.4 mmol), EtOH (1.0 mL) were added. After 1 h, the reaction was quenched by  $\text{NH}_4\text{Cl}$  (aq), and extracted by EA. Organic layer was washed by water, brine, dried over  $\text{Na}_2\text{SO}_4$ , and concentrated *in vacuo*. The residue was subjected to flash column chromatography ( $\text{SiO}_2$ , eluent Hexanes:EA = 2:1) to afford the corresponding crotylation products.

**(1*S*,2*S*)-2-methyl-1-phenylbutane-1,4-diol (5a).**

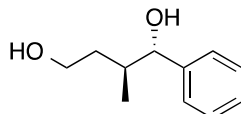

The residue was subjected to flash column chromatography for purification to furnish the title compound (37.8 mg, 70%, *dr* = >20:1) as a white solid.

***R*<sub>f</sub>** = 0.3 (50% EtOAc/Hexanes).

Spectral data is reported for the major isomer.

**<sup>1</sup>H NMR** (400 MHz, CDCl<sub>3</sub>): δ 7.38 – 7.24 (m, 5H), 4.41 (d, *J* = 7.6 Hz, 1H), 3.83 – 3.74 (m, 1H), 3.71 – 3.61 (m, 1H), 2.68 (m, 2H), 2.00 (d, *J* = 6.0 Hz, 1H), 1.86 – 1.75 (m, 1H), 1.67 – 1.55 (m, 1H), 0.78 (d, *J* = 6.9 Hz, 3H).

**<sup>13</sup>C NMR** (100 MHz, CDCl<sub>3</sub>): δ 143.75, 128.46, 127.70, 126.79, 79.40, 61.10, 38.54, 36.34, 17.48.

**LRMS** (CI) Calcd. for C<sub>11</sub>H<sub>16</sub>NaO<sub>2</sub> [*M*+Na]<sup>+</sup>: 203, Found: 203.

**FTIR** (neat): 3355, 3288, 2874, 1456, 1052, 1021, 1000, 768, 700 cm<sup>-1</sup>.

**HPLC** (Chiralcel OD-H column, hexanes:*i*-PrOH = 95:5, 1 mL/min, 210 nm), ee = 91%.

[α]<sub>D</sub><sup>25</sup> = - 41.3 (c = 0.75, CHCl<sub>3</sub>)

**M.P.** 91.3-92.3 °C

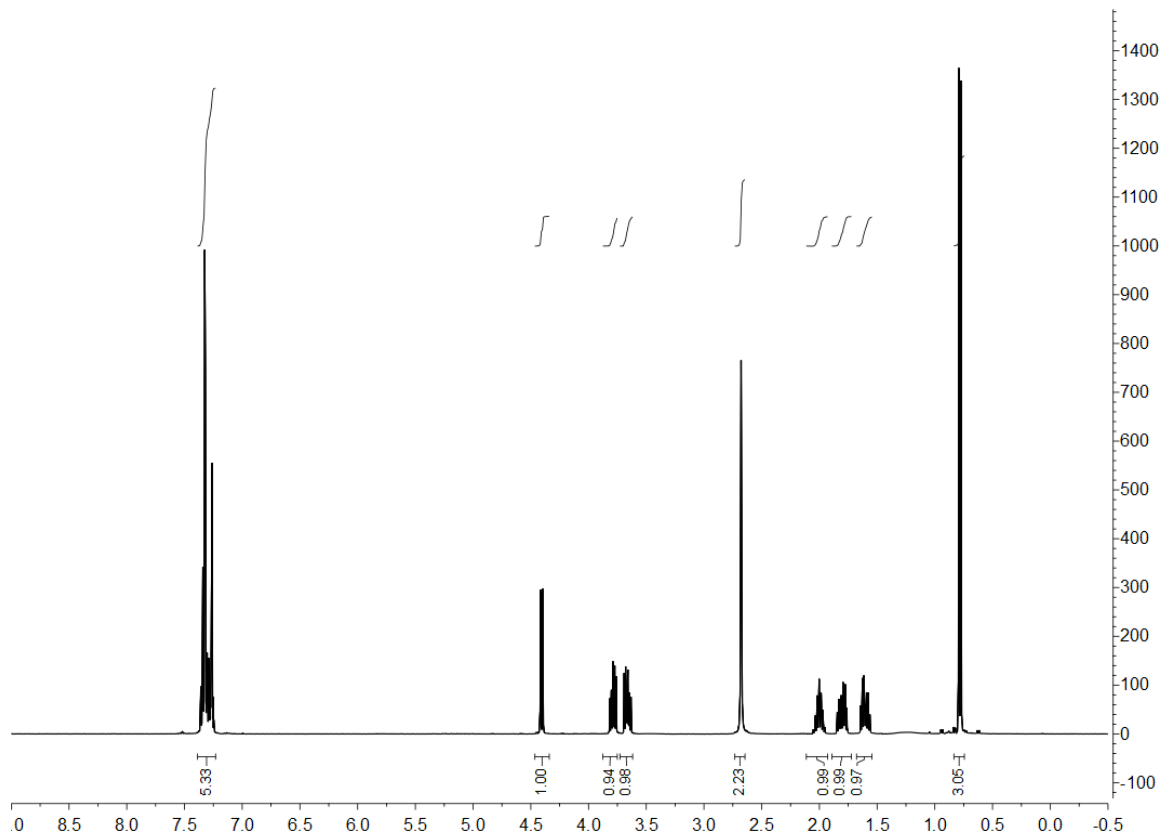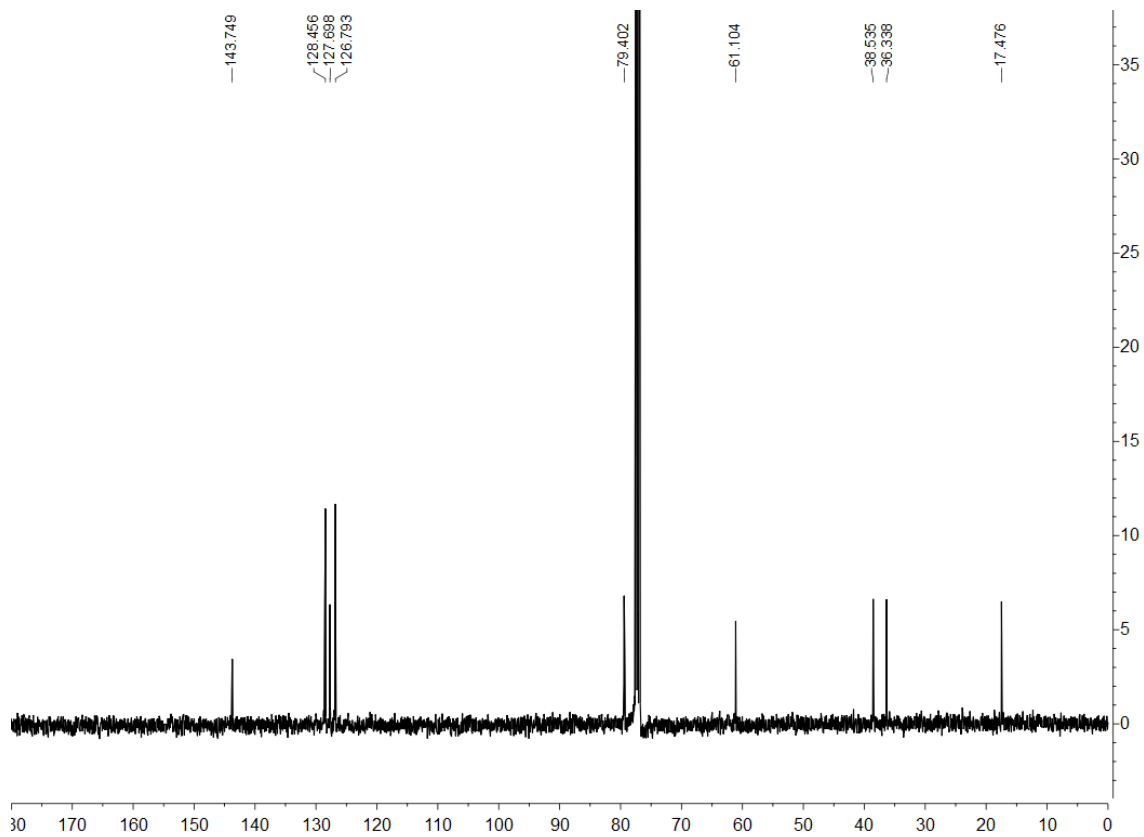

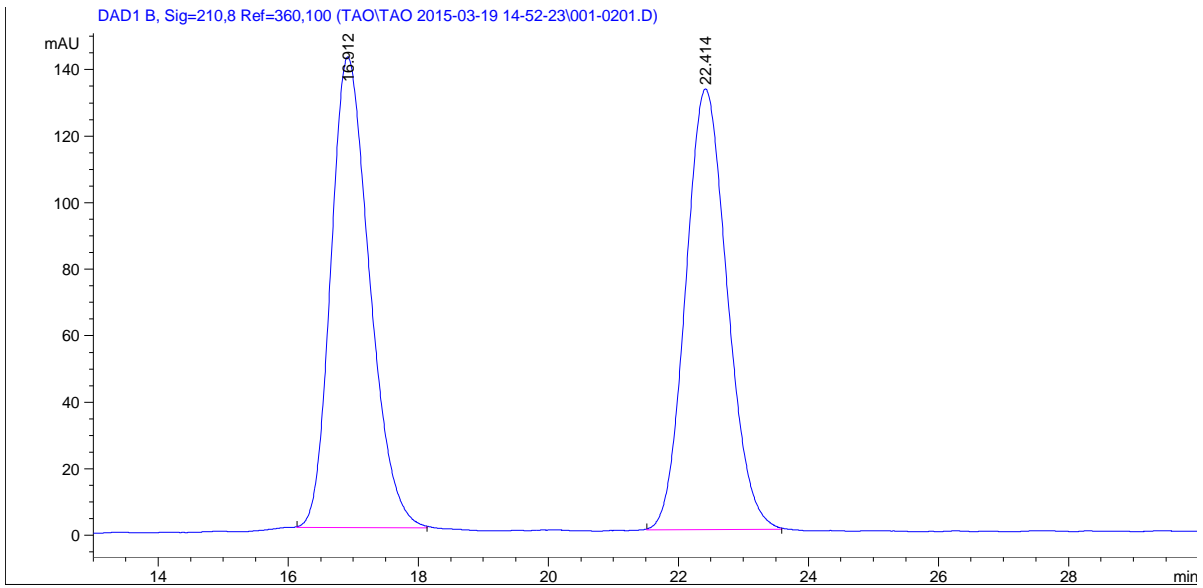

| Peak # | RetTime [min] | Type | Width [min] | Area [mAU*s] | Height [mAU] | Area %  |
|--------|---------------|------|-------------|--------------|--------------|---------|
| 1      | 16.912        | BB   | 0.6339      | 5844.65186   | 141.50946    | 49.8516 |
| 2      | 22.414        | BB   | 0.6877      | 5879.45801   | 132.49396    | 50.1484 |

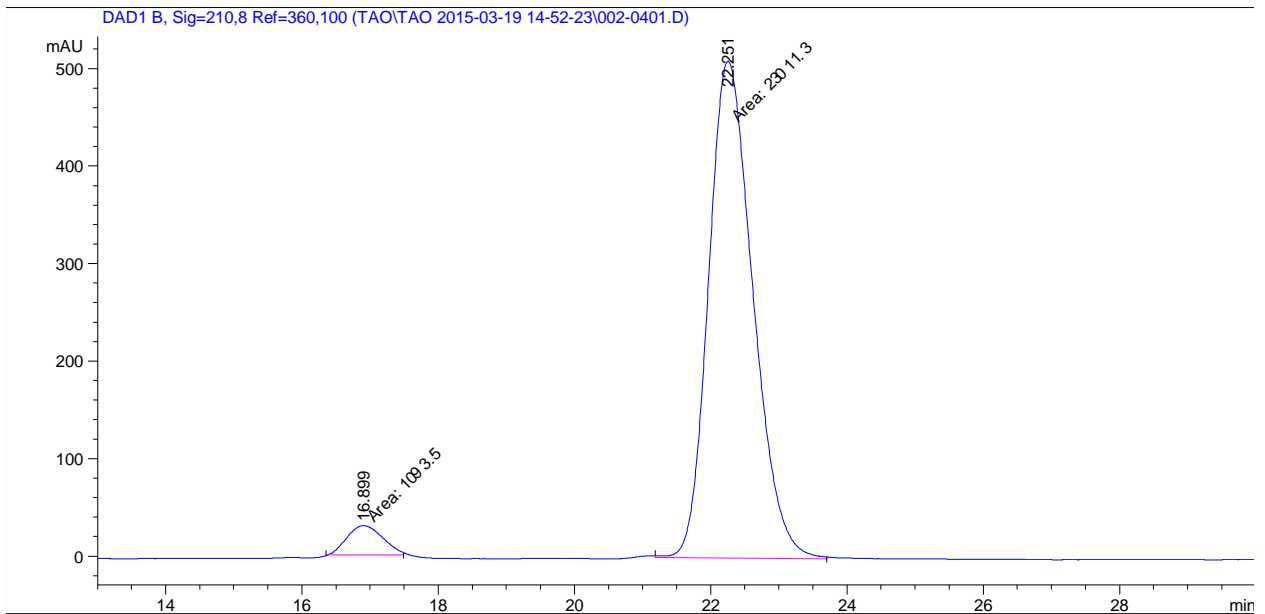

| Peak # | RetTime [min] | Type | Width [min] | Area [mAU*s] | Height [mAU] | Area %  |
|--------|---------------|------|-------------|--------------|--------------|---------|
| 1      | 16.899        | MM   | 0.6081      | 1093.50195   | 29.96907     | 4.5364  |
| 2      | 22.251        | MM   | 0.7528      | 2.30113e4    | 509.44580    | 95.4636 |

**(1*S*,2*S*)-2-methyl-1-(*p*-tolyl)butane-1,4-diol (5b).**

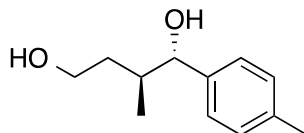

The residue was subjected to flash column chromatography for purification to furnish the title compound (24.8mg, 64%, *dr* = >20:1) as a white solid.

***R*<sub>f</sub>** = 0.3 (50% EtOAc/Hexanes).

Spectral data is reported for the major isomer.

**<sup>1</sup>H NMR** (400 MHz, CDCl<sub>3</sub>): δ 7.21 (d, *J* = 8.1 Hz, 2H), 7.15 (d, *J* = 7.9 Hz, 2H), 4.39 (d, *J* = 7.6 Hz, 1H), 3.86 – 3.76 (m, 1H), 3.74 – 3.61 (m, 1H), 2.34 (s, 3H), 2.26 (s, 2H), 1.99 (d, *J* = 6.4 Hz, 1H), 1.88 – 1.76 (m, 1H), 1.67 – 1.55 (m, 1H), 0.78 (d, *J* = 7.0 Hz, 3H).

**<sup>13</sup>C NMR** (100 MHz, CDCl<sub>3</sub>): δ 140.77, 137.42, 129.18, 126.71, 79.34, 61.27, 38.43, 36.52, 21.26, 17.49.

**LRMS** (CI) Calcd. for C<sub>12</sub>H<sub>18</sub>NaO<sub>2</sub> [M+Na]<sup>+</sup>: 217, Found: 217.

**FTIR** (neat): 3314, 3016, 2970, 1739, 1365, 1229, 1217cm<sup>-1</sup>.

**HPLC** (Chiralcel OD-H column, hexanes:*i*-PrOH = 95:5, 1 mL/min, 210 nm), ee = 93%.

[α]<sub>D</sub><sup>25</sup> = - 51.8 (c = 0.65, CHCl<sub>3</sub>)

**M.P.** 117-118.6 °C

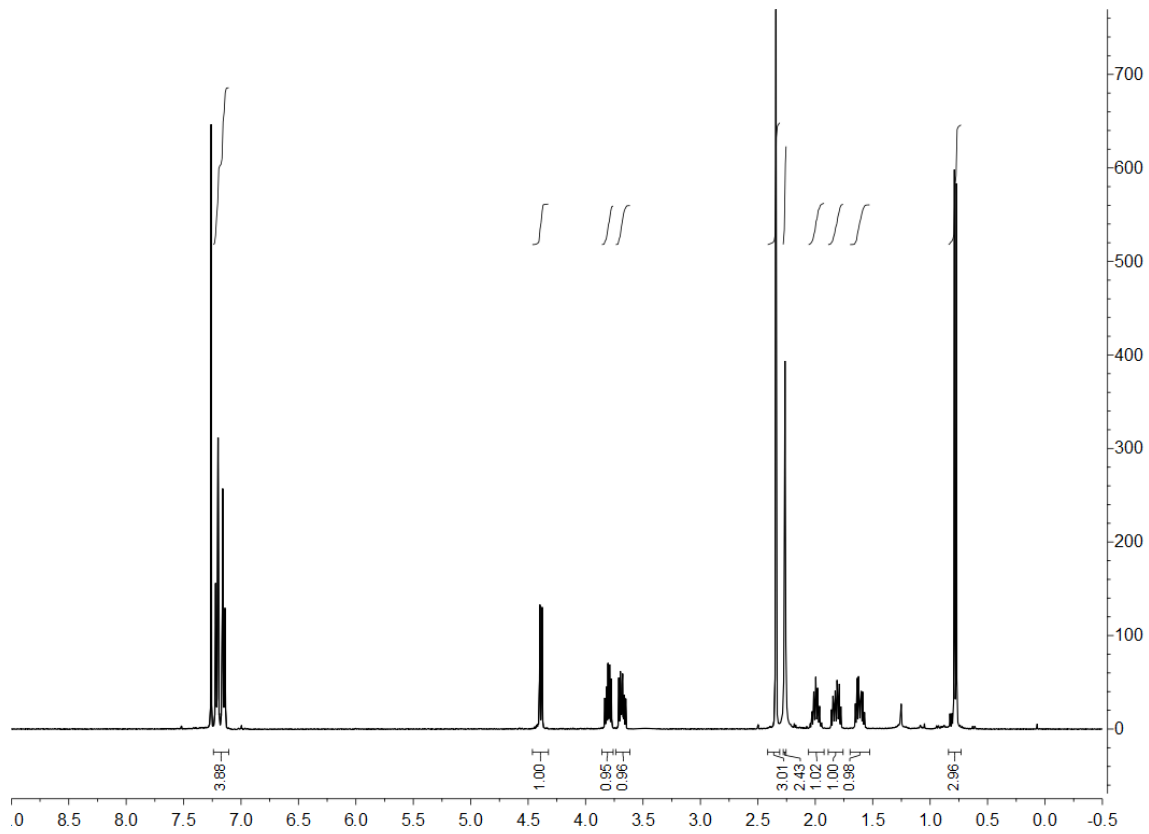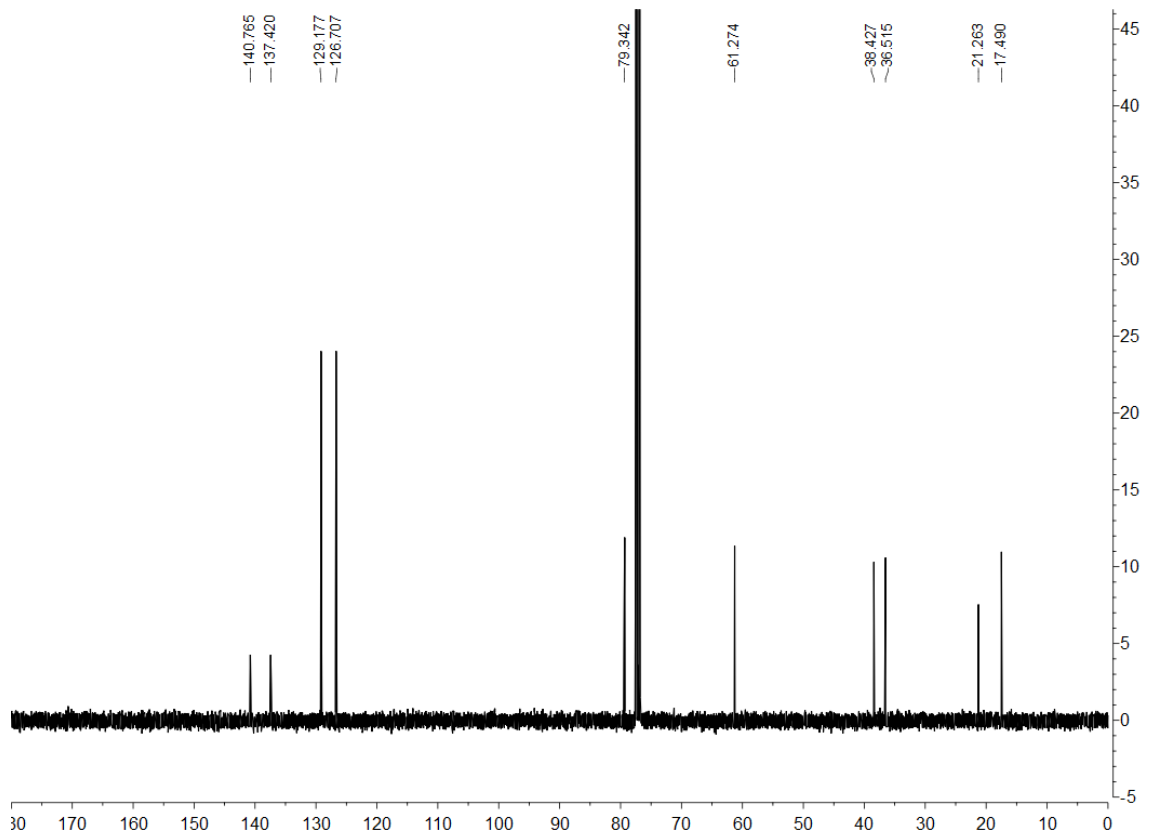



DAD1 B, Sig=210,8 Ref=360,100 (TAOITAO 2015-03-26 11-56-16\001-0201.D)

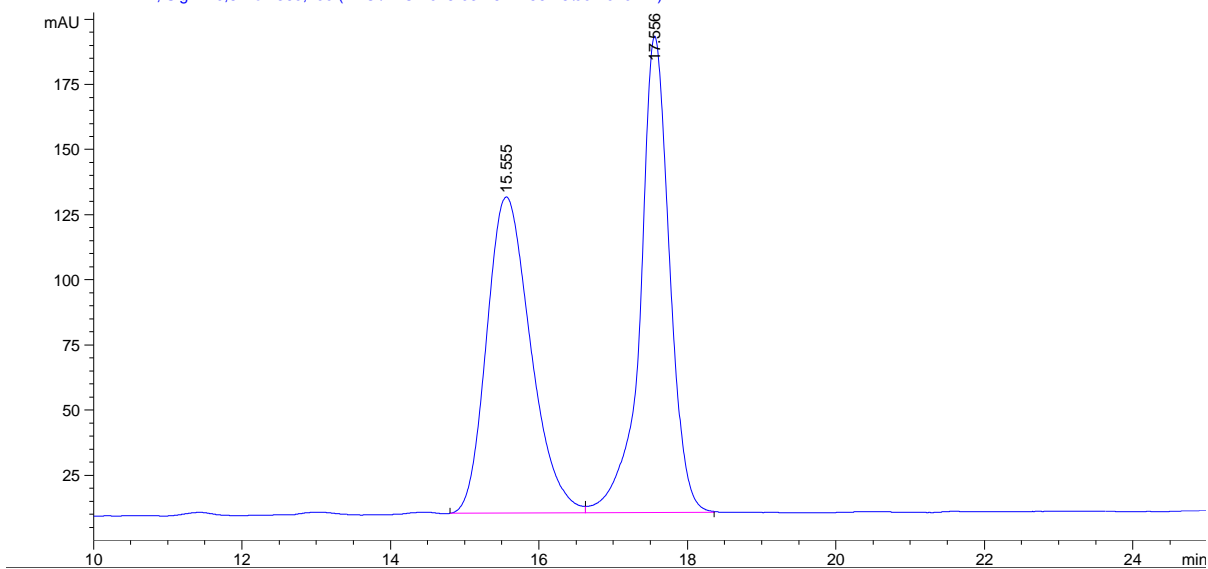

| Peak # | RetTime [min] | Type | Width [min] | Area [mAU*s] | Height [mAU] | Area %  |
|--------|---------------|------|-------------|--------------|--------------|---------|
| 1      | 15.555        | BV   | 0.6318      | 4969.22900   | 121.32995    | 49.7294 |
| 2      | 17.556        | VB   | 0.4167      | 5023.30176   | 182.76692    | 50.2706 |

DAD1 B, Sig=210,8 Ref=360,100 (TAOITAO 2015-03-26 11-56-16\002-0301.D)

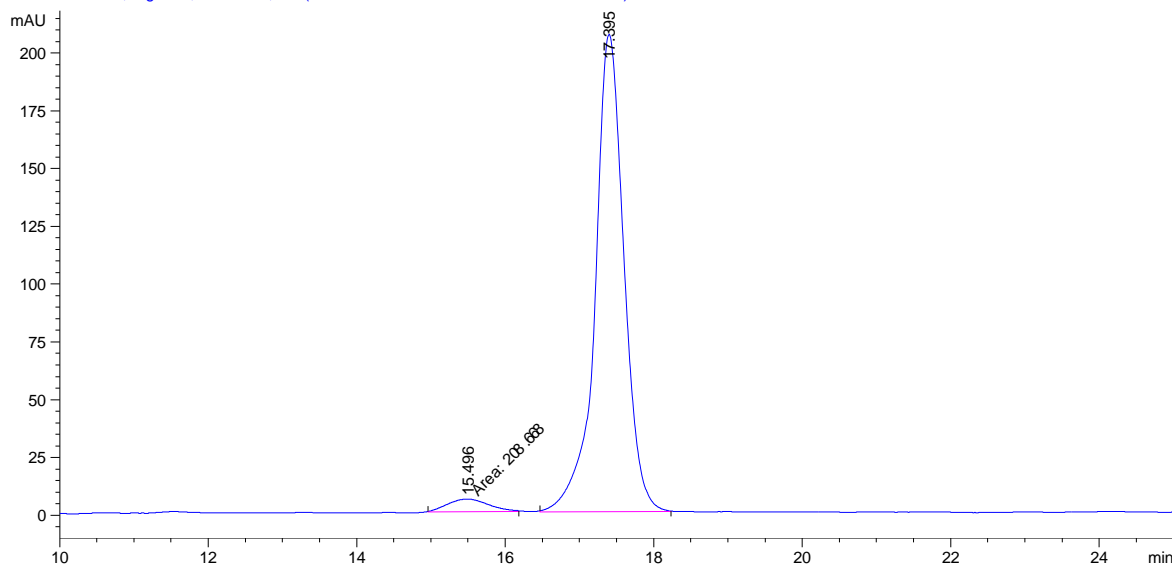

| Peak # | RetTime [min] | Type | Width [min] | Area [mAU*s] | Height [mAU] | Area %  |
|--------|---------------|------|-------------|--------------|--------------|---------|
| 1      | 15.496        | MM   | 0.6357      | 208.66779    | 5.47067      | 3.5911  |
| 2      | 17.395        | BB   | 0.4124      | 5601.99072   | 206.54958    | 96.4089 |

**(1*S*,2*S*)-1-(4-bromophenyl)-2-methylbutane-1,4-diol (5c).**

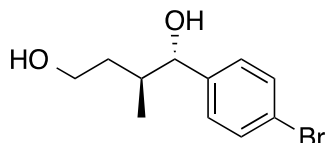

The residue was subjected to flash column chromatography for purification to furnish the title compound (39.8 mg, 76%, *dr* = >20:1) as a white solid.

***R<sub>f</sub>*** = 0.3 (50% EtOAc/Hexanes).

Spectral data is reported for the major isomer.

**<sup>1</sup>H NMR** (400 MHz, Methanol-*d*<sub>4</sub>): δ 7.47 (d, *J* = 8.5 Hz, 2H), 7.25 (d, *J* = 8.2 Hz, 2H), 4.40 (d, *J* = 6.5 Hz, 1H), 3.69 – 3.61 (m, 1H), 3.59 – 3.51 (m, 1H), 1.97 – 1.78 (m, 2H), 1.39 – 1.26 (m, 1H), 0.81 (d, *J* = 6.8 Hz, 3H).

**<sup>13</sup>C NMR** (100 MHz, Methanol-*d*<sub>4</sub>): δ 144.57, 132.02, 129.74, 121.62, 78.81, 61.13, 38.41, 36.07, 16.54.

**LRMS** (CI) Calcd. for C<sub>11</sub>H<sub>15</sub>BrNaO<sub>2</sub> [M+Na]<sup>+</sup>: 281, Found: 281.

**FTIR** (neat): 2959, 2929, 2856, 1484, 1050, 1011, 825 cm<sup>-1</sup>.

**HPLC** (Chiralcel OD-H column, hexanes:*i*-PrOH = 95:5, 1 mL/min, 210 nm), ee = 92%.

[α]<sub>D</sub><sup>25</sup> = - 6.4 (c = 0.7, CHCl<sub>3</sub>)

**M.P.** 146.1-147.4 °C

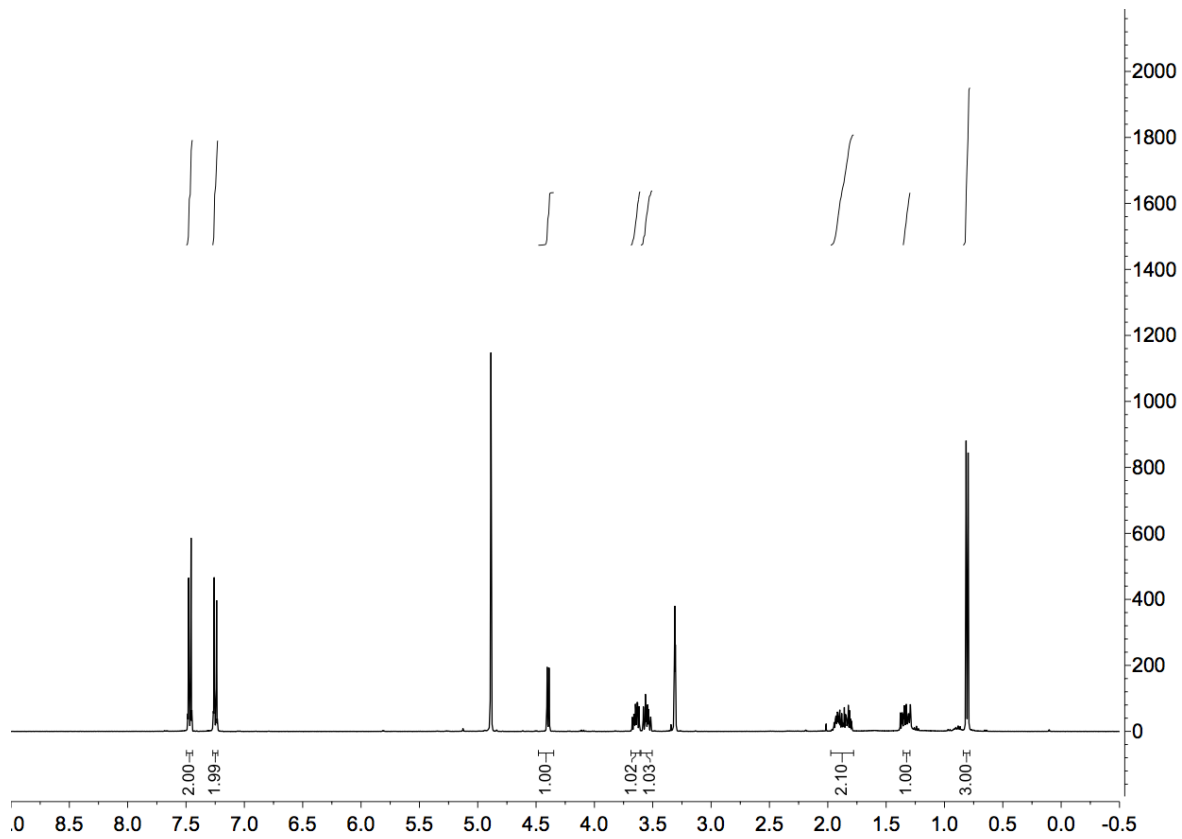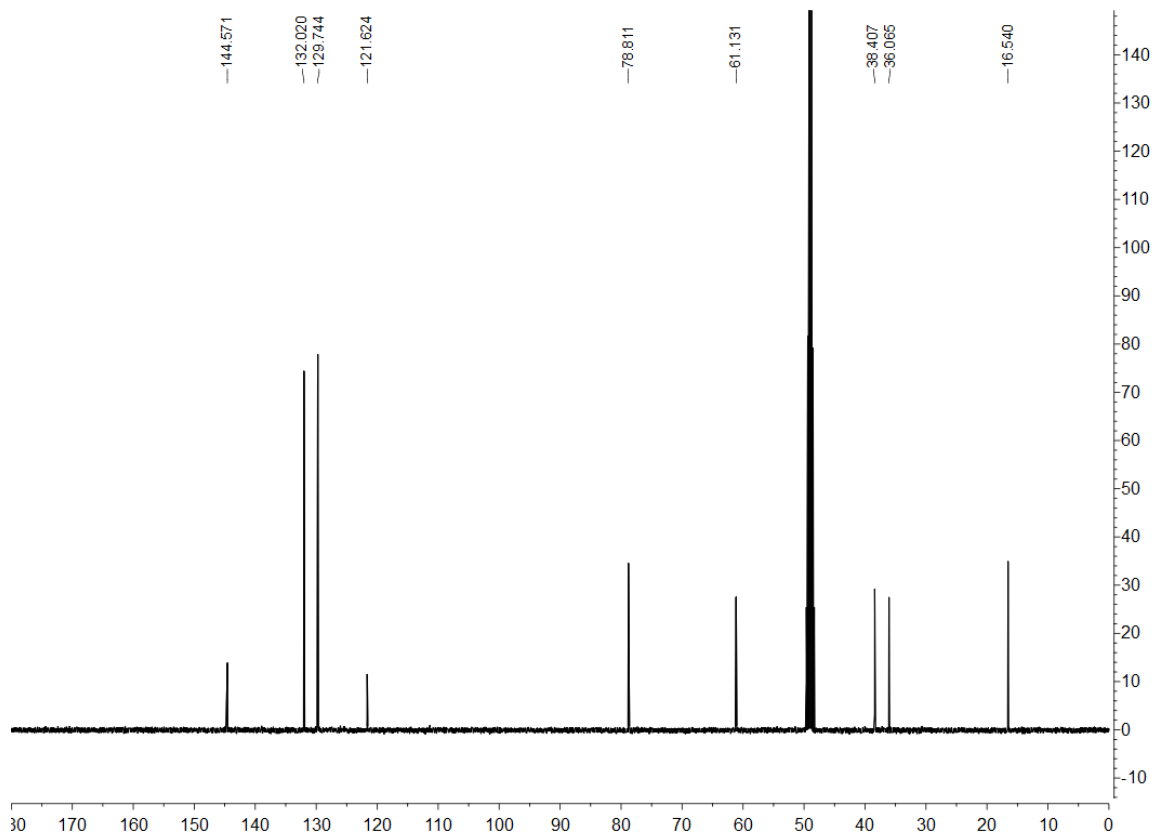

DAD1 B, Sig=210,8 Ref=360,100 (TAO\TAO\_1SAMPLE 2015-03-06 10-02-09\020-0201.D)

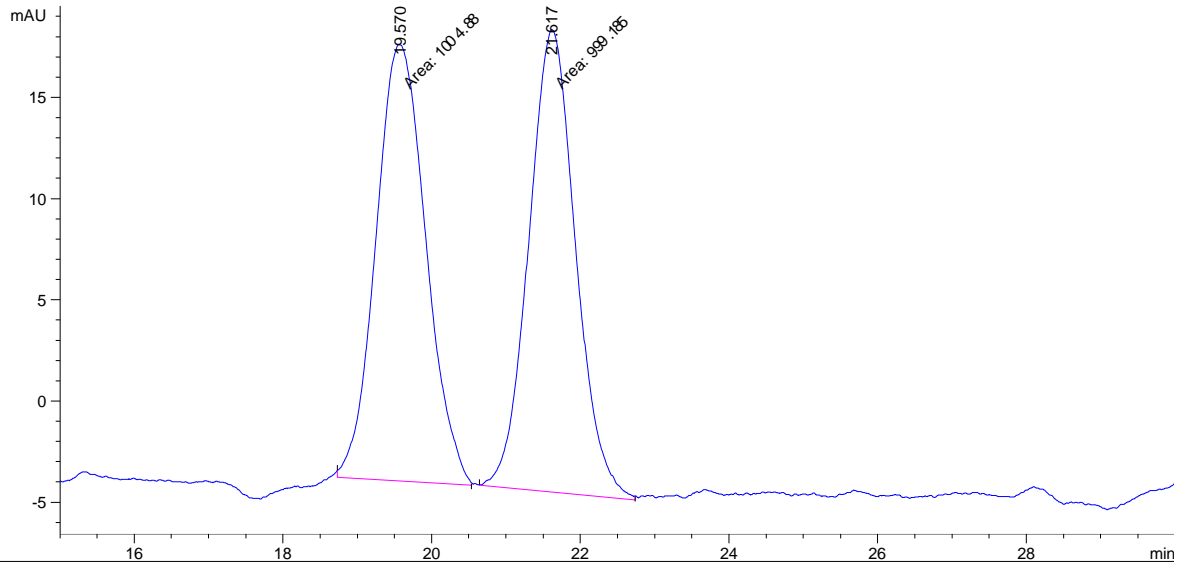

| Peak # | RetTime [min] | Type | Width [min] | Area [mAU*s] | Height [mAU] | Area %  |
|--------|---------------|------|-------------|--------------|--------------|---------|
| 1      | 19.570        | MM   | 0.7770      | 1004.88214   | 21.55487     | 50.1421 |
| 2      | 21.617        | MM   | 0.7291      | 999.18536    | 22.84135     | 49.8579 |

DAD1 B, Sig=210,8 Ref=360,100 (ZCZCZC0281 2015-03-04 17-41-23\020-0501.D)

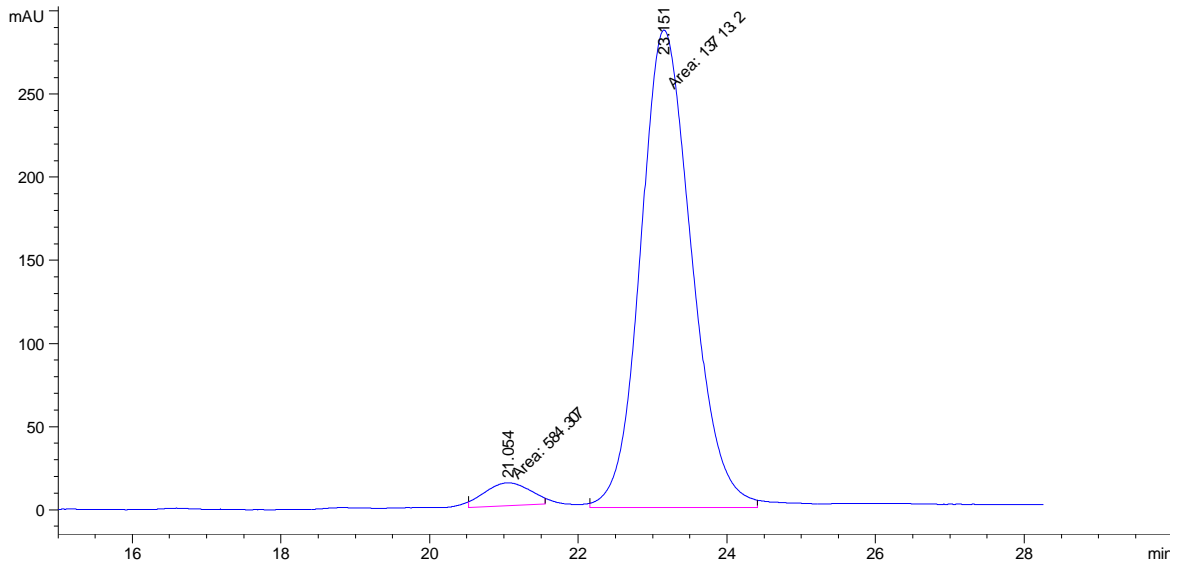

| Peak # | RetTime [min] | Type | Width [min] | Area [mAU*s] | Height [mAU] | Area %  |
|--------|---------------|------|-------------|--------------|--------------|---------|
| 1      | 21.054        | MM   | 0.7062      | 584.30731    | 13.79014     | 4.0868  |
| 2      | 23.151        | MM   | 0.7959      | 1.37132e4    | 287.16132    | 95.9132 |

**(1*S*,2*S*)-1-(4-fluorophenyl)-2-methylbutane-1,4-diol (5d).**

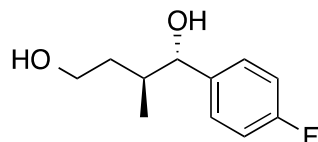

The residue was subjected to flash column chromatography for purification to furnish the title compound (27.7 mg, 75%, *dr* = >20:1) as a white solid.

***R*<sub>f</sub>** = 0.3 (50% EtOAc/Hexanes).

Spectral data is reported for the major isomer.

**<sup>1</sup>H NMR** (400 MHz, CDCl<sub>3</sub>): δ 7.32 – 7.26 (m, 2H), 7.06 – 6.99 (m, 2H), 4.41 (d, *J* = 7.5 Hz, 1H), 3.81 (ddd, *J* = 10.6, 6.3, 5.1 Hz, 1H), 3.68 (ddd, *J* = 10.7, 7.8, 4.8 Hz, 1H), 2.03 – 1.91 (m, 1H), 1.85 – 1.75 (m, 1H), 1.65 – 1.56 (m, 1H), 0.78 (d, *J* = 6.9 Hz, 3H).

**<sup>13</sup>C NMR** (100 MHz, CDCl<sub>3</sub>): δ 163.37, 160.93, 139.40, 139.37, 128.22, 128.14, 115.21, 115.00, 78.56, 60.91, 38.49, 36.03, 17.20.

**<sup>19</sup>F NMR** (100 MHz, CDCl<sub>3</sub>): δ -115.17.

**LRMS** (CI) Calcd. for C<sub>11</sub>H<sub>15</sub>FNaO<sub>2</sub> [M+Na]<sup>+</sup>: 221, Found: 221.

**FTIR** (neat): 3336, 1604, 1509, 1222, 1056, 1033, 1013, 836 cm<sup>-1</sup>.

**HPLC** (Chiralcel OD-H column, hexanes:*i*-PrOH = 95:5, 1 mL/min, 210 nm), ee = 92%.

[α]<sub>D</sub><sup>25</sup> = + 10.0 (c = 0.32, CHCl<sub>3</sub>)

**M.P.** 114.7-115.9 °C

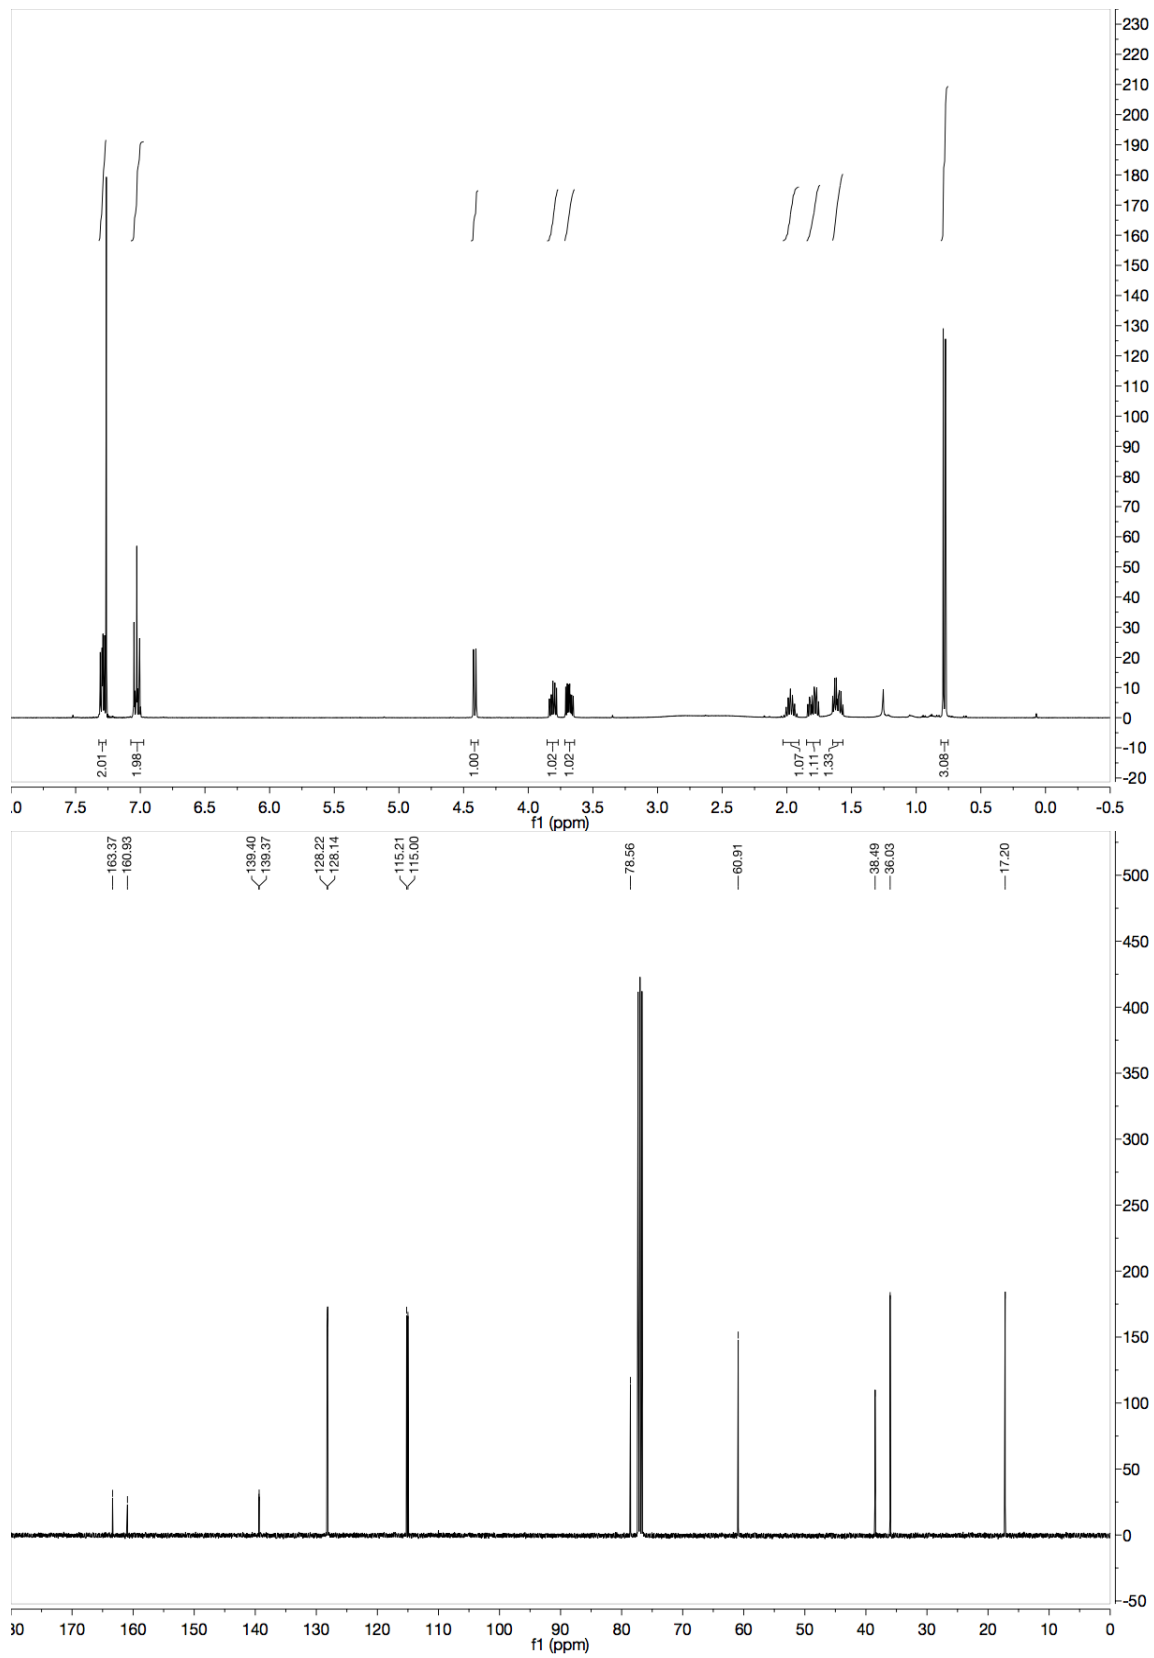

DAD1 B, Sig=210,8 Ref=360,100 (VG\TAO\_1SAMPLE 2015-06-27 10-42-34\010-0201.D)

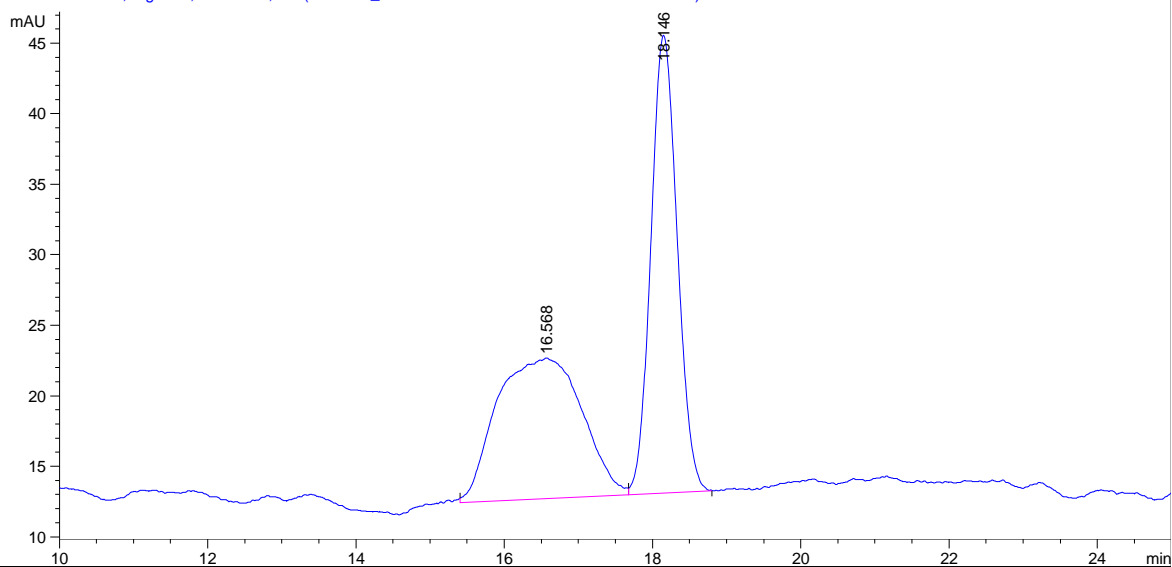

| Peak # | RetTime [min] | Type | Width [min] | Area [mAU*s] | Height [mAU] | Area %  |
|--------|---------------|------|-------------|--------------|--------------|---------|
| 1      | 16.568        | BV   | 0.9456      | 794.74628    | 9.95268      | 49.6548 |
| 2      | 18.146        | VB   | 0.3818      | 805.79523    | 32.44131     | 50.3452 |

DAD1 B, Sig=210,8 Ref=360,100 (VG\TAO\_1SAMPLE 2015-06-27 10-42-34\010-0301.D)

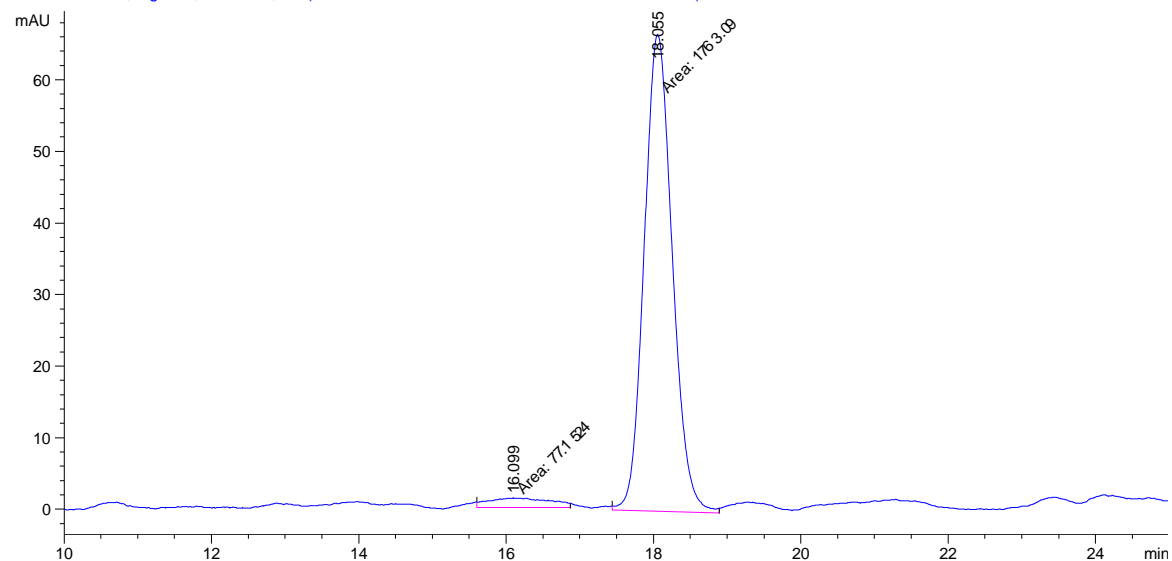

| Peak # | RetTime [min] | Type | Width [min] | Area [mAU*s] | Height [mAU] | Area %  |
|--------|---------------|------|-------------|--------------|--------------|---------|
| 1      | 16.099        | MM   | 0.9821      | 77.15244     | 1.30927      | 4.1925  |
| 2      | 18.055        | MM   | 0.4412      | 1763.08777   | 66.59743     | 95.8075 |

**(1*S*,2*S*)-1-(3-methoxyphenyl)-2-methylbutane-1,4-diol (5e).**

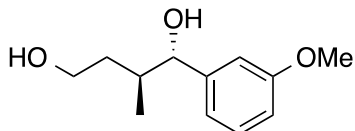

The residue was subjected to flash column chromatography for purification to furnish the title compound (31.5 mg, 75%, *dr* = >20:1) as a colorless oil.

**$R_f$**  = 0.3 (50% EtOAc/Hexanes).

Spectral data is reported for the major isomer.

**$^1\text{H NMR}$**  (400 MHz,  $\text{CDCl}_3$ ):  $\delta$  7.24 (t,  $J$  = 8.1 Hz, 1H), 6.90 – 6.86 (m, 2H), 6.83 – 6.78 (m, 1H), 4.35 (d,  $J$  = 7.6 Hz, 1H), 3.79 (s, 3H), 3.78 – 3.72 (m, 1H), 3.68 – 3.59 (m, 1H), 3.01 – 2.87 (m, 2H), 1.97 (p,  $J$  = 6.5 Hz, 1H), 1.83 – 1.72 (m, 1H), 1.65 – 1.53 (m, 1H), 0.78 (d,  $J$  = 6.9 Hz, 3H).

**$^{13}\text{C NMR}$**  (100 MHz,  $\text{CDCl}_3$ ):  $\delta$  159.71, 145.53, 129.39, 119.23, 112.99, 112.30, 79.26, 60.99, 55.34, 38.50, 36.32, 17.50.

**$\text{LRMS}$**  (CI) Calcd. for  $\text{C}_{12}\text{H}_{18}\text{NaO}_3$  [ $\text{M}+\text{Na}$ ] $^+$ : 233, Found: 233.

**$\text{FTIR}$**  (neat): 3448, 3016, 2970, 1739, 1435, 1366, 1229, 1216  $\text{cm}^{-1}$ .

**$\text{HPLC}$**  (Chiralcel OD-H column, hexanes:*i*-PrOH = 95:5, 1 mL/min, 210 nm), ee = 92%.

$[\alpha]_D^{25}$  = - 29.0 ( $c$  = 0.76,  $\text{CHCl}_3$ )



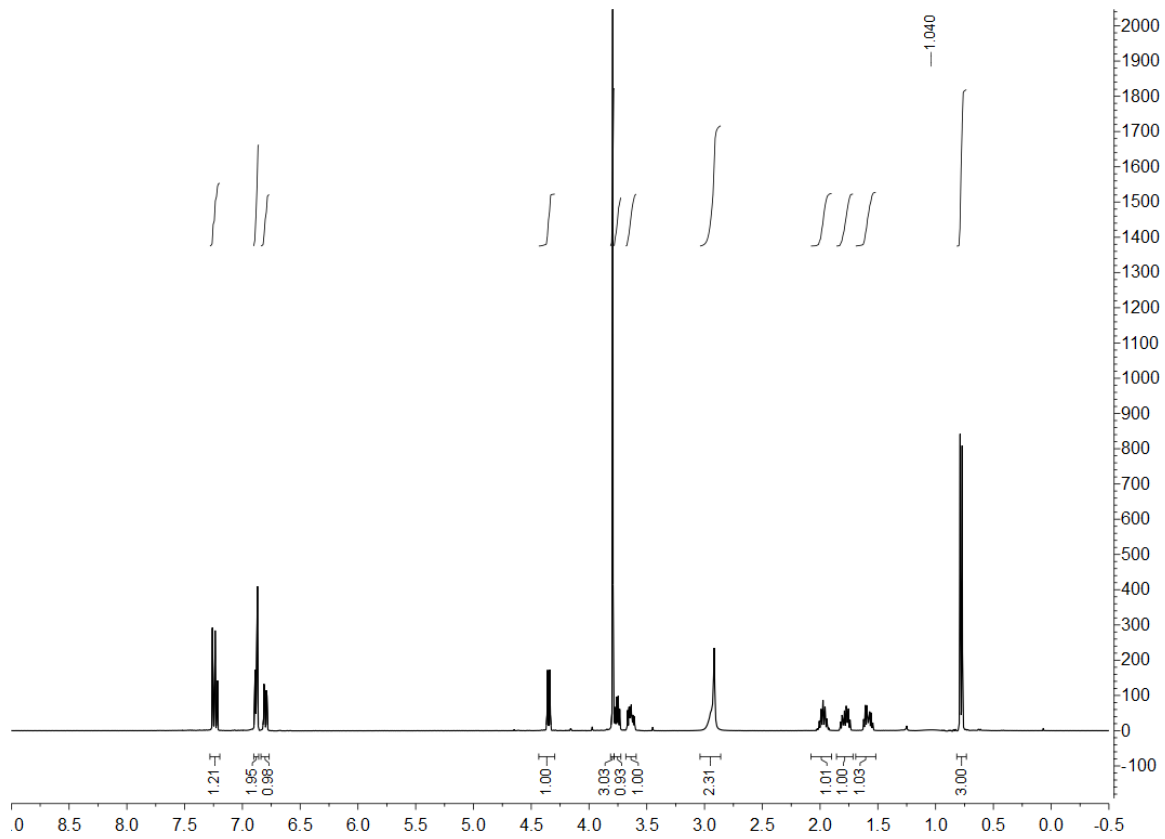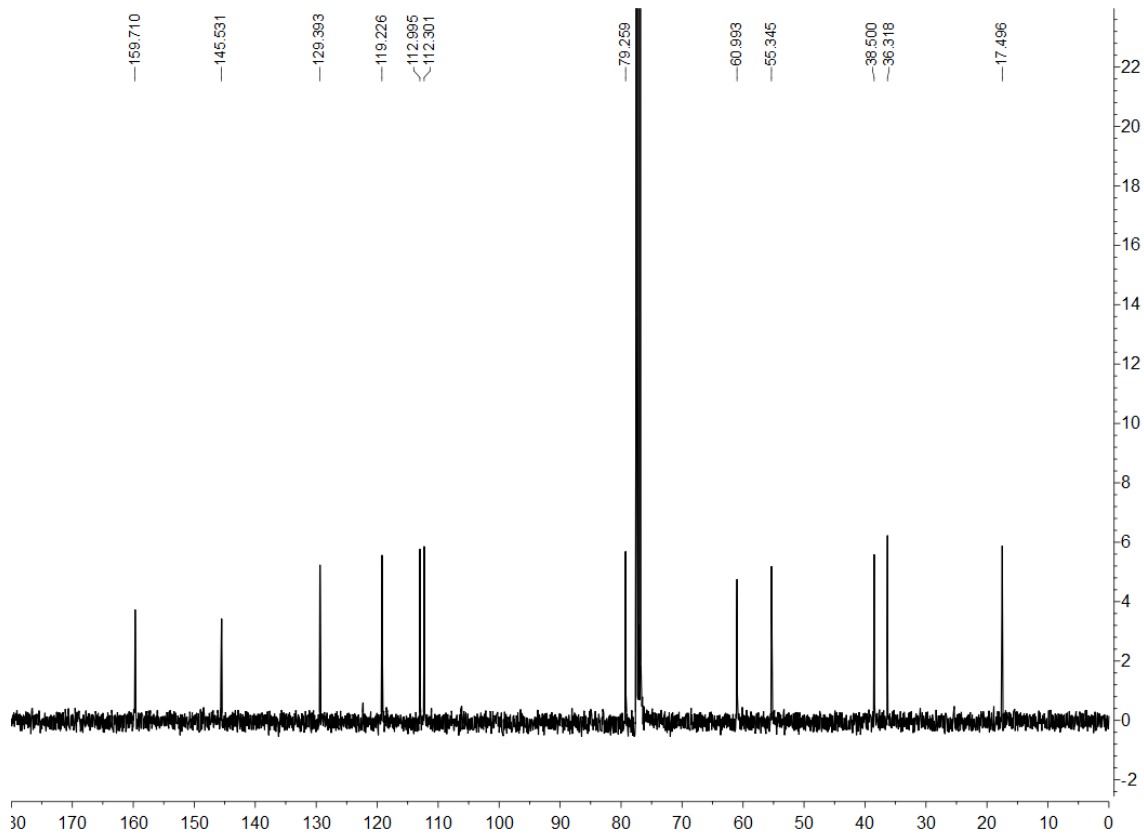

DAD1 B, Sig=210,8 Ref=360,100 (TAOTAO 2015-03-17 16-23-06\002-0301.D)

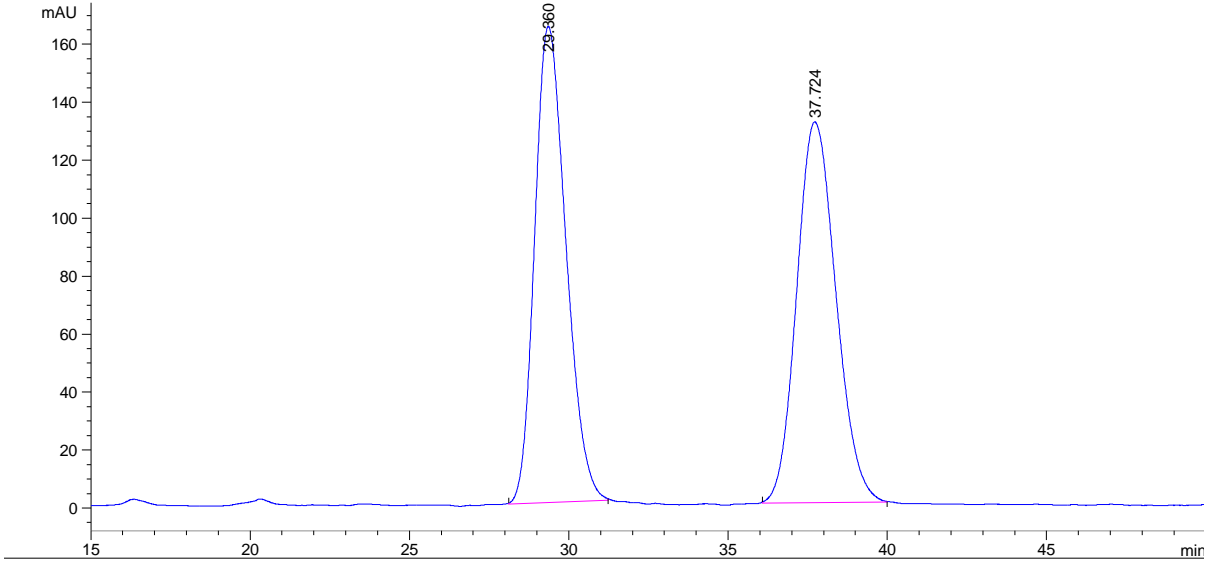

| Peak # | RetTime [min] | Type | Width [min] | Area [mAU*s] | Height [mAU] | Area %  |
|--------|---------------|------|-------------|--------------|--------------|---------|
| 1      | 29.360        | BB   | 1.0488      | 1.12134e4    | 164.18495    | 49.8926 |
| 2      | 37.724        | BB   | 1.2898      | 1.12617e4    | 131.41185    | 50.1074 |

DAD1 B, Sig=210,8 Ref=360,100 (TAOTAO 2015-03-17 16-23-06\003-0501.D)

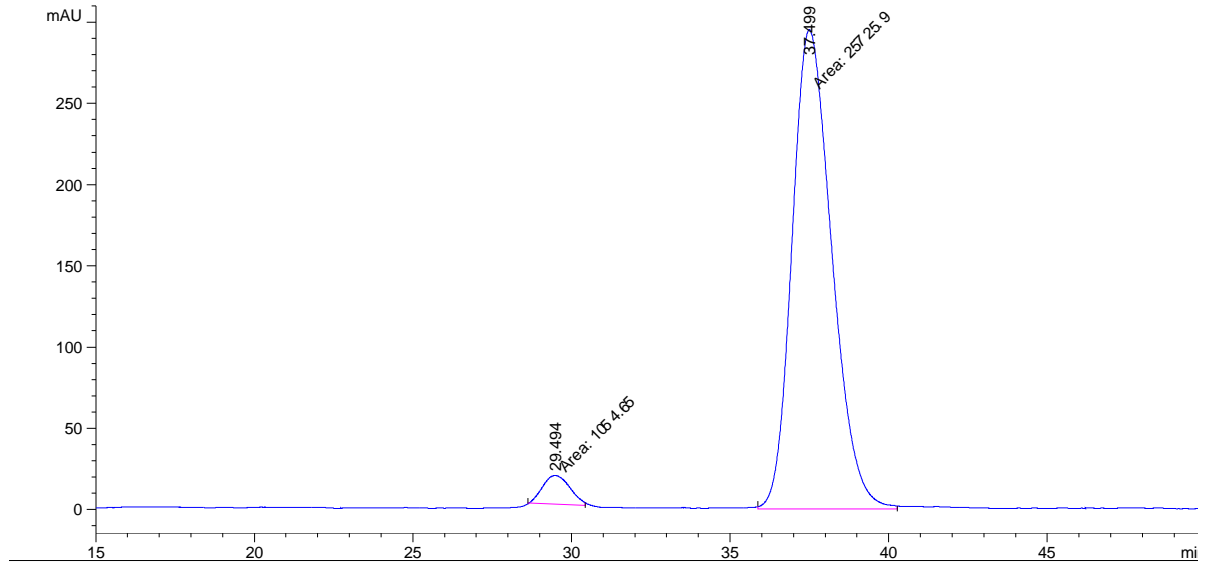

| Peak # | RetTime [min] | Type | Width [min] | Area [mAU*s] | Height [mAU] | Area %  |
|--------|---------------|------|-------------|--------------|--------------|---------|
| 1      | 29.494        | MM   | 0.9963      | 1054.65125   | 17.64229     | 3.9381  |
| 2      | 37.499        | MM   | 1.4534      | 2.57259e4    | 295.01712    | 96.0619 |

**(1*S*,2*S*)-1-(benzo[*d*][1,3]dioxol-5-yl)-2-methylbutane-1,4-diol (5f).**

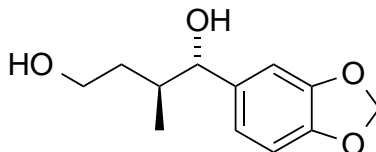

The residue was subjected to flash column chromatography for purification to furnish the title compound (23.7 mg, 63%, *dr* = >20:1) as a white solid.

**R<sub>f</sub>** = 0.3 (50% EtOAc/Hexanes).

Spectral data is reported for the major isomer.

**<sup>1</sup>H NMR** (400 MHz, CDCl<sub>3</sub>): δ 6.84 (s, 1H), 6.76 (d, *J* = 1.0 Hz, 2H), 5.95 (s, 2H), 4.32 (d, *J* = 7.8 Hz, 1H), 3.84 – 3.76 (m, 1H), 3.72 – 3.64 (m, 1H), 2.61 (s, 2H), 1.94 (hept, *J* = 6.7 Hz, 1H), 1.85 – 1.76 (m, 1H), 1.65 – 1.57 (m, 1H), 0.77 (d, *J* = 6.9 Hz, 3H).

**<sup>13</sup>C NMR** (100 MHz, CDCl<sub>3</sub>): δ 147.71, 146.90, 137.73, 120.11, 107.90, 106.88, 100.96, 79.17, 61.07, 38.48, 36.41, 17.38.

**LRMS** (CI) Calcd. for C<sub>12</sub>H<sub>16</sub>NaO<sub>4</sub> [M+Na]<sup>+</sup>: 247, Found: 247.

**FTIR** (neat): 3323, 2890, 1488, 1246, 1037, 1006, 932, 823 cm<sup>-1</sup>.

**HPLC** (Chiralcel AS-H column, hexanes:*i*-PrOH = 95:5, 1 mL/min, 210 nm), ee = 94%.

[α]<sub>D</sub><sup>25</sup> = - 58.7 (c = 0.48, CHCl<sub>3</sub>)

**M.P.** 97.3-98.6 °C

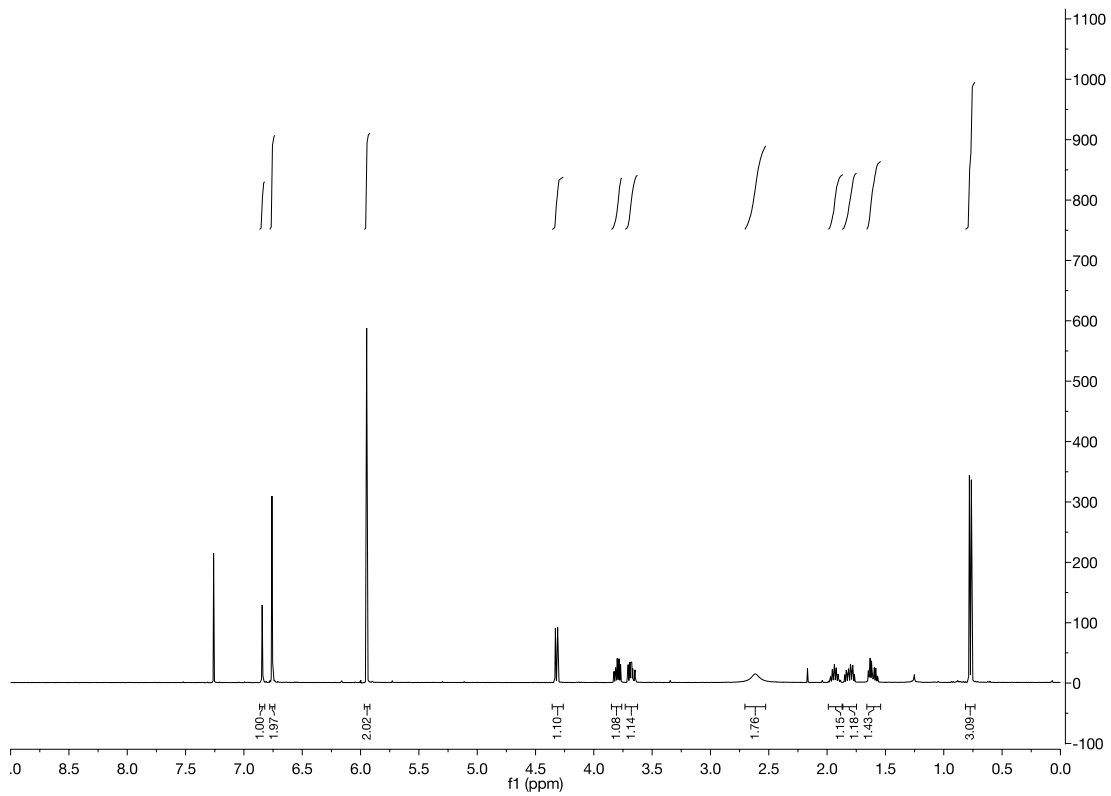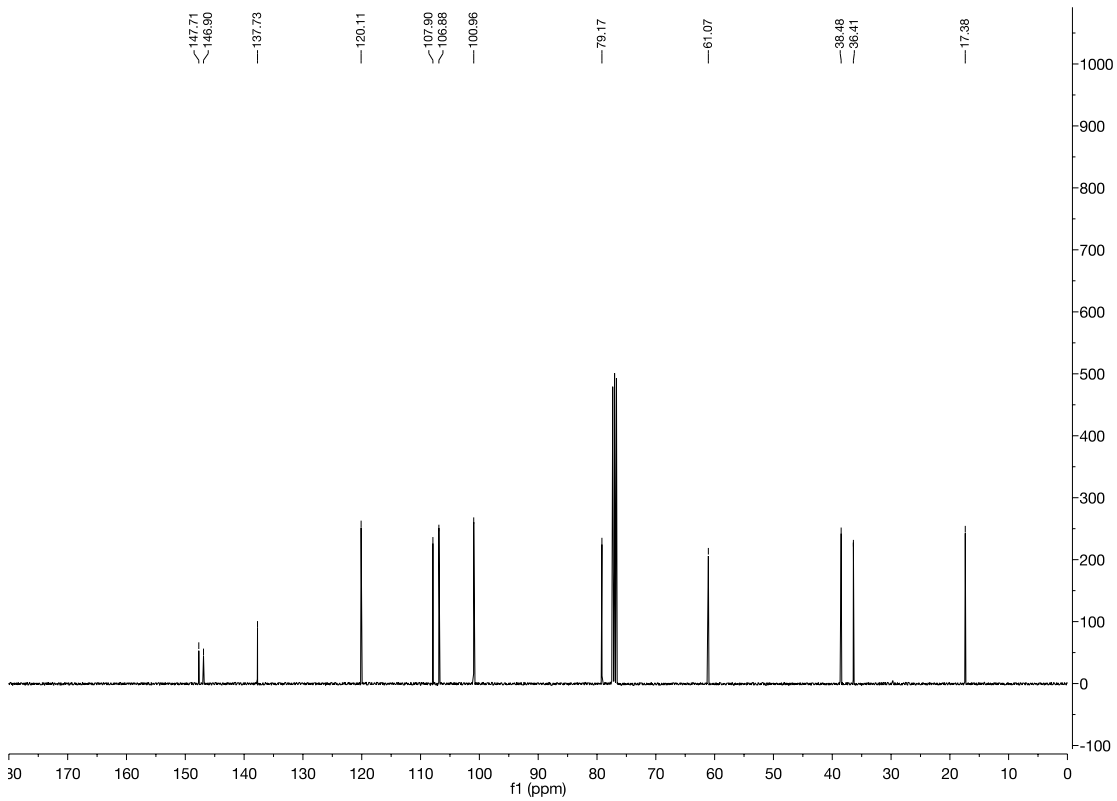

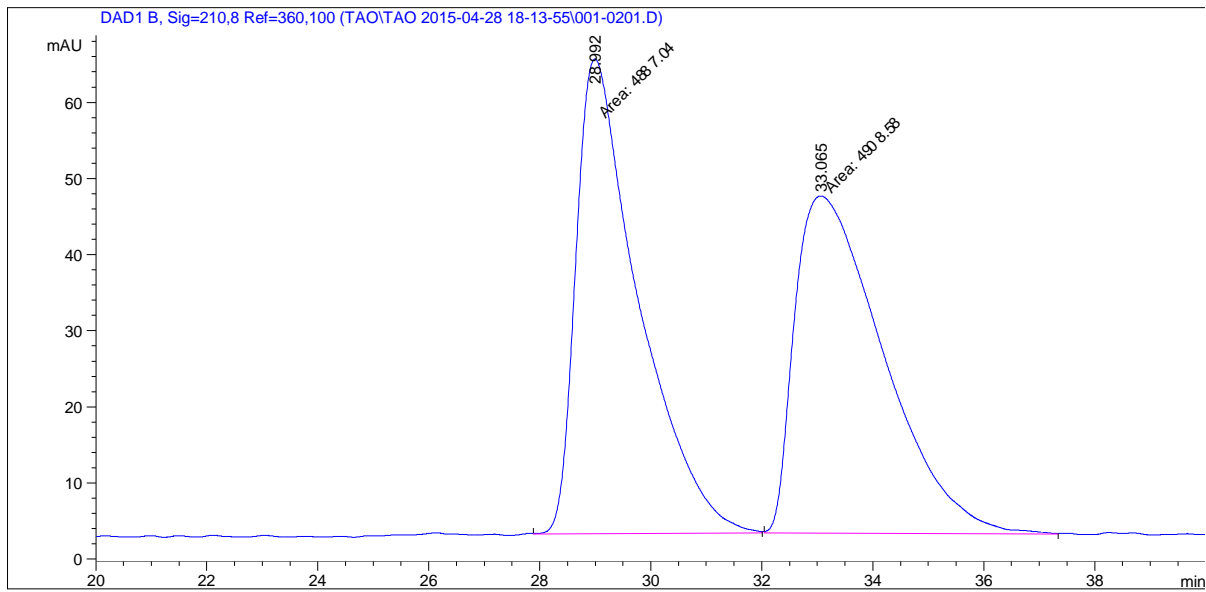

| Peak # | RetTime [min] | Type | Width [min] | Area [mAU*s] | Height [mAU] | Area %  |
|--------|---------------|------|-------------|--------------|--------------|---------|
| 1      | 28.992        | MM   | 1.3066      | 4887.03564   | 62.33603     | 49.8900 |
| 2      | 33.065        | MM   | 1.8481      | 4908.57764   | 44.26786     | 50.1100 |

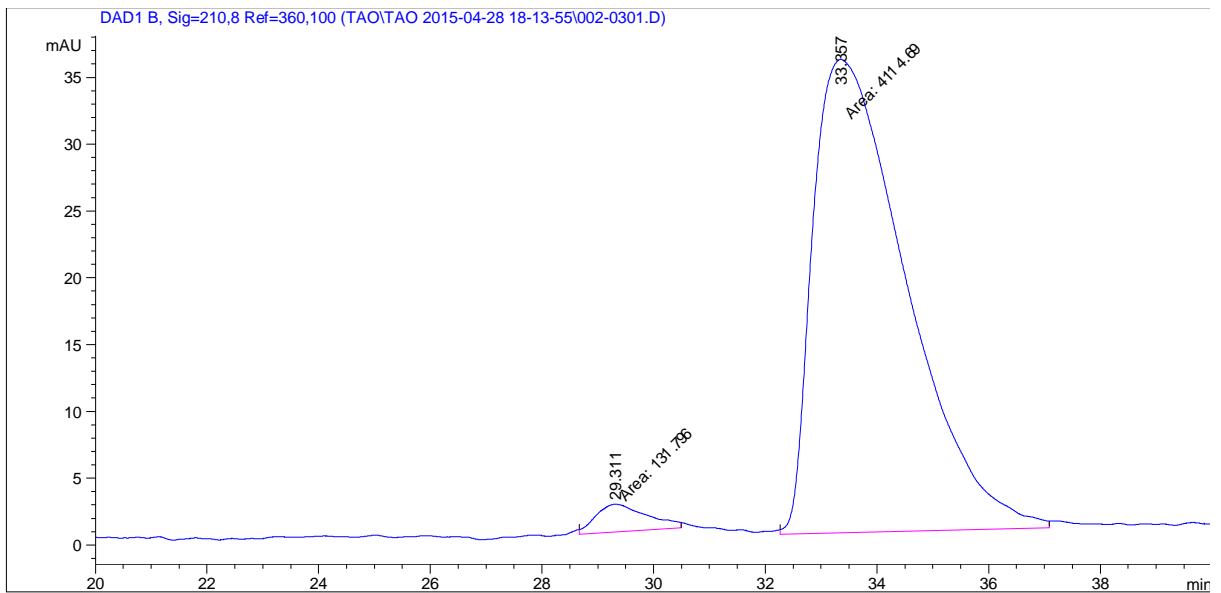

| Peak # | RetTime [min] | Type | Width [min] | Area [mAU*s] | Height [mAU] | Area %  |
|--------|---------------|------|-------------|--------------|--------------|---------|
| 1      | 29.311        | MM   | 1.0546      | 131.79645    | 2.08292      | 3.1037  |
| 2      | 33.357        | MM   | 1.9357      | 4114.68604   | 35.42754     | 96.8963 |

**(1S,2S)-2-methyl-1-(*o*-tolyl)butane-1,4-diol (5g)**

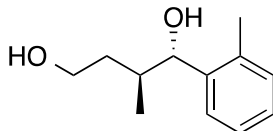

The residue was subjected to flash column chromatography for purification to furnish the title compound (23.6 mg, 61%, *dr* = >20:1) as a white solid.

$R_f$  = 0.4 (50% EtOAc/Hexanes).

Spectral data is reported for the major isomer.

**$^1\text{H NMR}$**  (400 MHz,  $\text{CDCl}_3$ ):  $\delta$  7.42 (dd,  $J$  = 7.6, 1.5 Hz, 1H), 7.22 (td,  $J$  = 7.3, 1.8 Hz, 1H), 7.16 (td,  $J$  = 7.3, 1.5 Hz, 1H), 7.13 (dd,  $J$  = 7.5, 1.8 Hz, 1H), 4.69 (d,  $J$  = 7.8 Hz, 1H), 3.84 – 3.73 (m, 1H), 3.66 (ddd,  $J$  = 10.8, 7.9, 4.7 Hz, 1H), 2.86 (s, 2H), 2.34 (s, 3H), 2.02 (hept,  $J$  = 7.0 Hz, 1H), 1.90 – 1.76 (m, 1H), 1.74 – 1.61 (m, 1H), 0.81 (d,  $J$  = 7.0 Hz, 3H).

**$^{13}\text{C NMR}$**  (100 MHz,  $\text{CDCl}_3$ ):  $\delta$  141.99, 135.06, 130.37, 127.18, 126.30, 126.22, 75.18, 61.06, 38.02, 36.22, 19.49, 17.40.

**LRMS** (CI) Calcd. for  $\text{C}_{12}\text{H}_{18}\text{NaO}_2$   $[\text{M}+\text{Na}]^+$ : 217, Found: 217.

**FTIR** (neat): 2958, 2923, 1460, 1378, 1054, 1012, 756, 729  $\text{cm}^{-1}$ .

**HPLC** (Chiralcel OD-H column, hexanes:*i*-PrOH = 95:5, 1 mL/min, 210 nm), ee = 87%.

$[\alpha]_D^{25}$  = - 37.9 ( $c$  = 0.44,  $\text{CHCl}_3$ )

**M.P.** 84.6-86.7  $^\circ\text{C}$

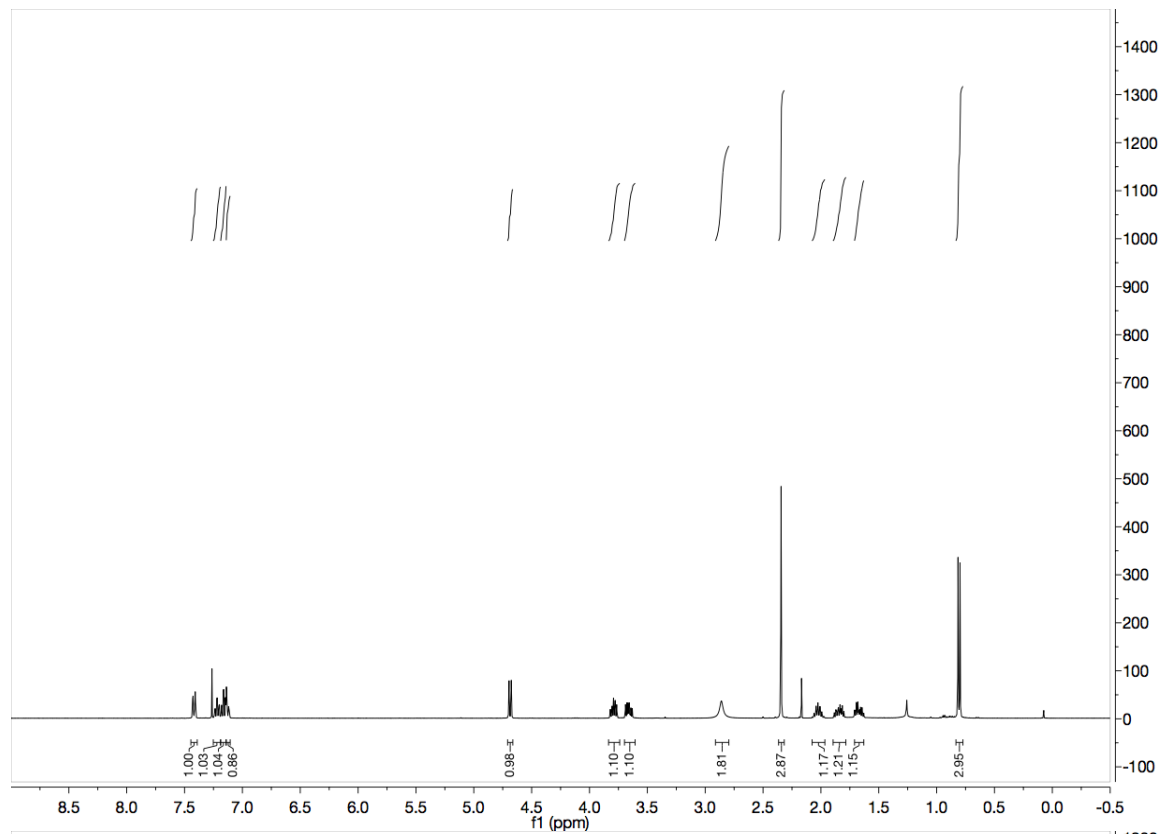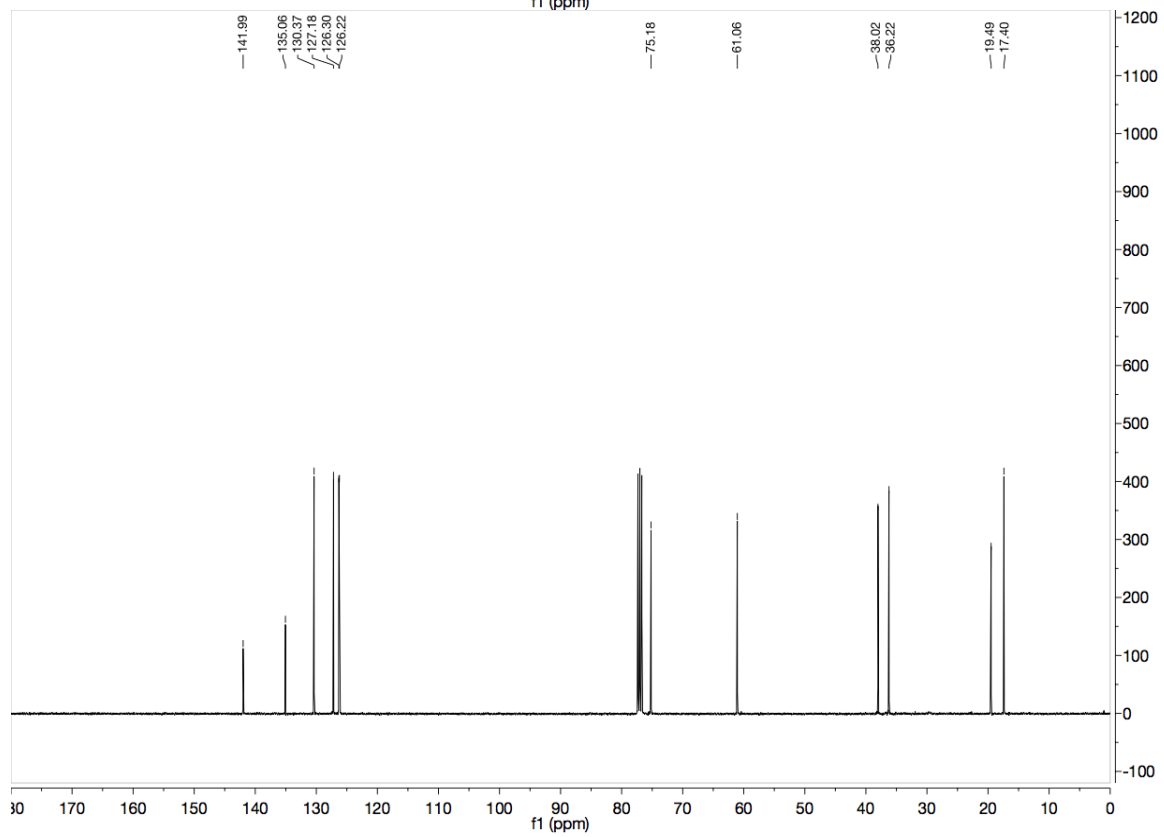

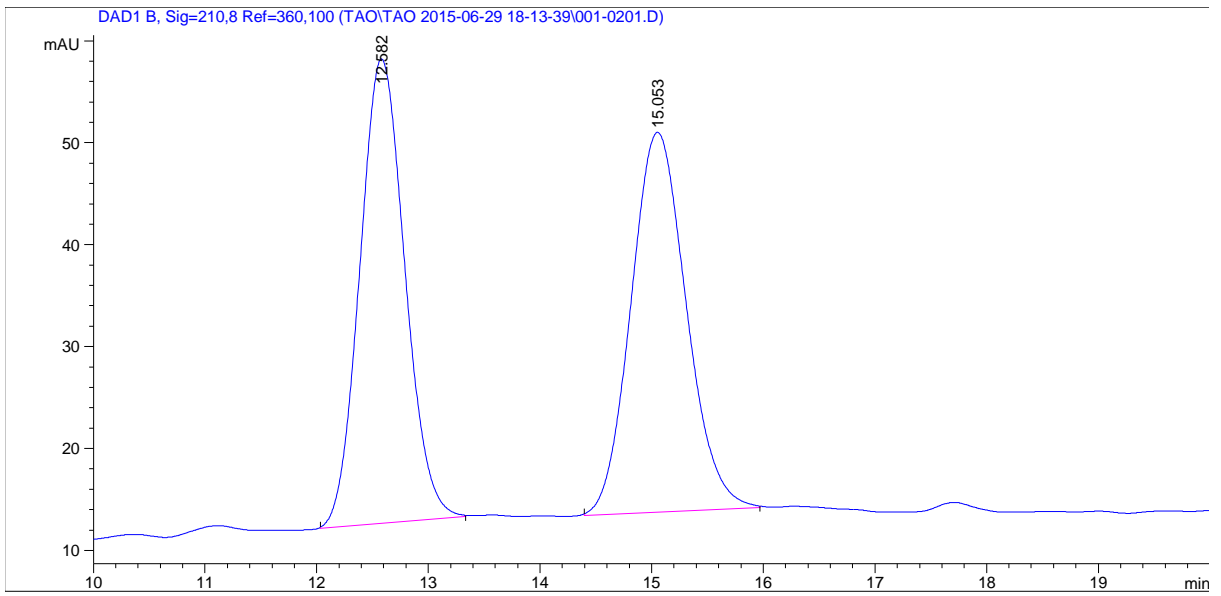

| Peak # | RetTime [min] | Type | Width [min] | Area [mAU*s] | Height [mAU] | Area %  |
|--------|---------------|------|-------------|--------------|--------------|---------|
| 1      | 12.582        | BB   | 0.4370      | 1277.60510   | 45.58098     | 49.9202 |
| 2      | 15.053        | BB   | 0.5332      | 1281.68738   | 37.27221     | 50.0798 |

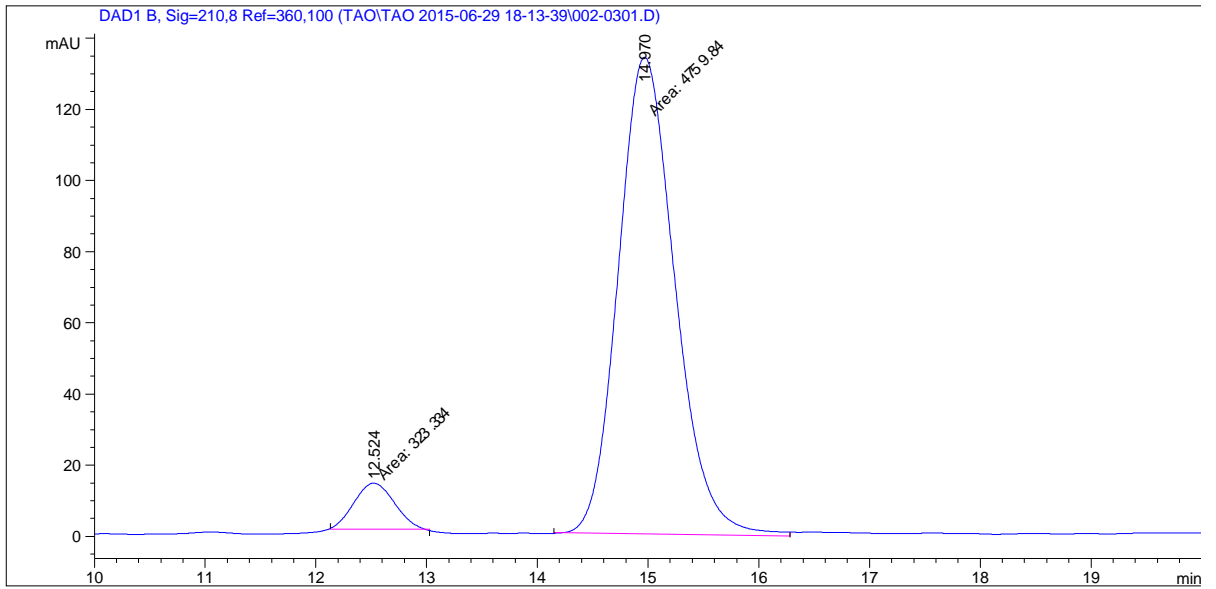

| Peak # | RetTime [min] | Type | Width [min] | Area [mAU*s] | Height [mAU] | Area %  |
|--------|---------------|------|-------------|--------------|--------------|---------|
| 1      | 12.524        | MM   | 0.4181      | 323.33398    | 12.88840     | 6.3609  |
| 2      | 14.970        | MM   | 0.5924      | 4759.83838   | 133.90485    | 93.6391 |



**(1*S*,2*S*)-1-(2-chlorophenyl)-2-methylbutane-1,4-diol (5h).**

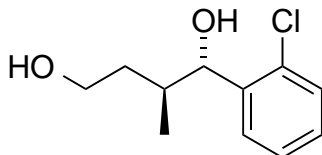

The residue was subjected to flash column chromatography for purification to furnish the title compound (29.1 mg, 68%, *dr* = >20:1) as a colorless oil.

**$R_f$**  = 0.5 (50% EtOAc/Hexanes).

Spectral data is reported for the major isomer.

**$^1\text{H NMR}$**  (400 MHz,  $\text{CDCl}_3$ ):  $\delta$  7.52 (dd,  $J = 7.7, 1.7$  Hz, 1H), 7.32 (dd,  $J = 7.8, 1.4$  Hz, 1H), 7.28 (dd,  $J = 7.6, 1.3$  Hz, 1H), 7.19 (dd,  $J = 7.7, 1.8$  Hz, 1H), 4.95 (d,  $J = 6.8$  Hz, 1H), 3.83 – 3.74 (m, 1H), 3.68 – 3.58 (m, 1H), 3.26 (bs, 1H), 2.69 (bs, 1H), 2.09 (hept,  $J = 6.5$  Hz, 1H), 1.83 – 1.69 (m, 1H), 1.68 – 1.56 (m, 1H), 0.90 (d,  $J = 7.0$  Hz, 3H).

**$^{13}\text{C NMR}$**  (100 MHz,  $\text{CDCl}_3$ ):  $\delta$  141.23, 132.45, 129.33, 128.38, 128.19, 126.95, 74.73, 60.67, 37.38, 35.01, 16.92.

**LRMS** (CI) Calcd. for  $\text{C}_{11}\text{H}_{15}\text{NaClO}_2$   $[\text{M}+\text{Na}]^+$ : 237, Found: 237.

**FTIR** (neat): 3315, 2958, 2922, 2850, 1438, 1049, 1023, 735  $\text{cm}^{-1}$ .

**HPLC** (Chiralcel AS-H/AS-H column, hexanes:*i*-PrOH = 95:5, 0.5 mL/min, 210 nm), ee = 91%.

**$[\alpha]_D^{25}$**  = - 19.2 ( $c = 0.53$ ,  $\text{CHCl}_3$ )

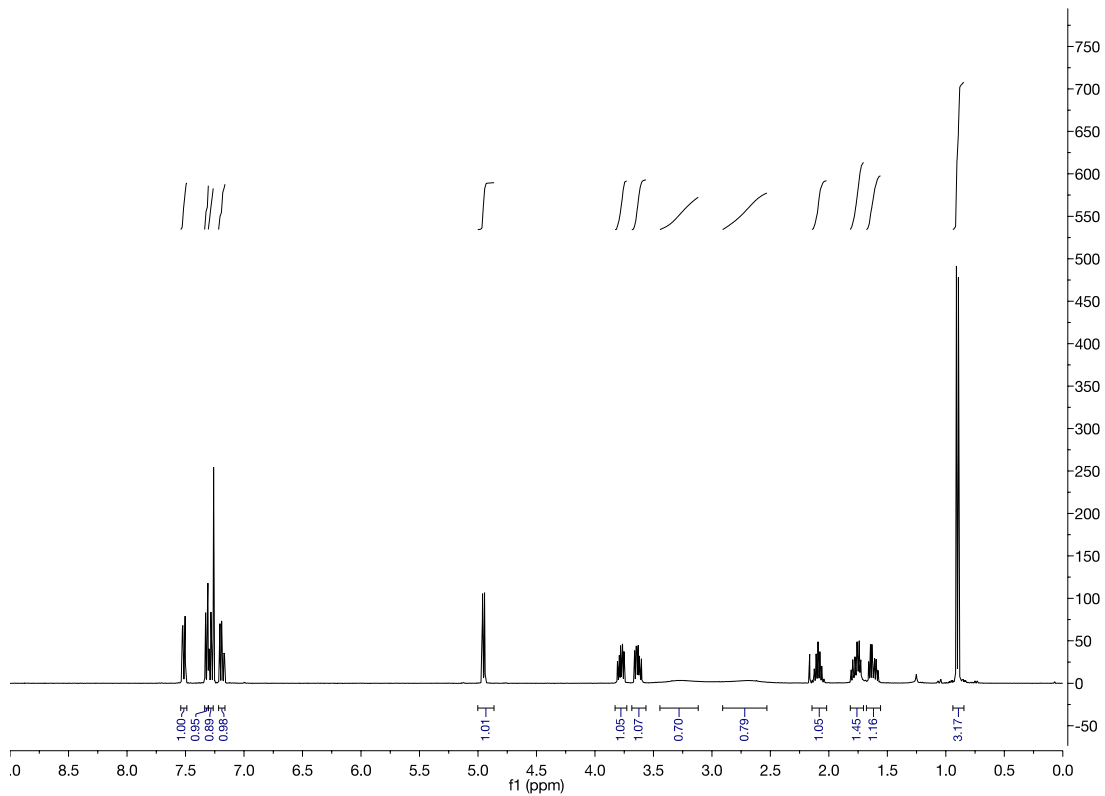

CARBON\_01  
Tao-6-182-H

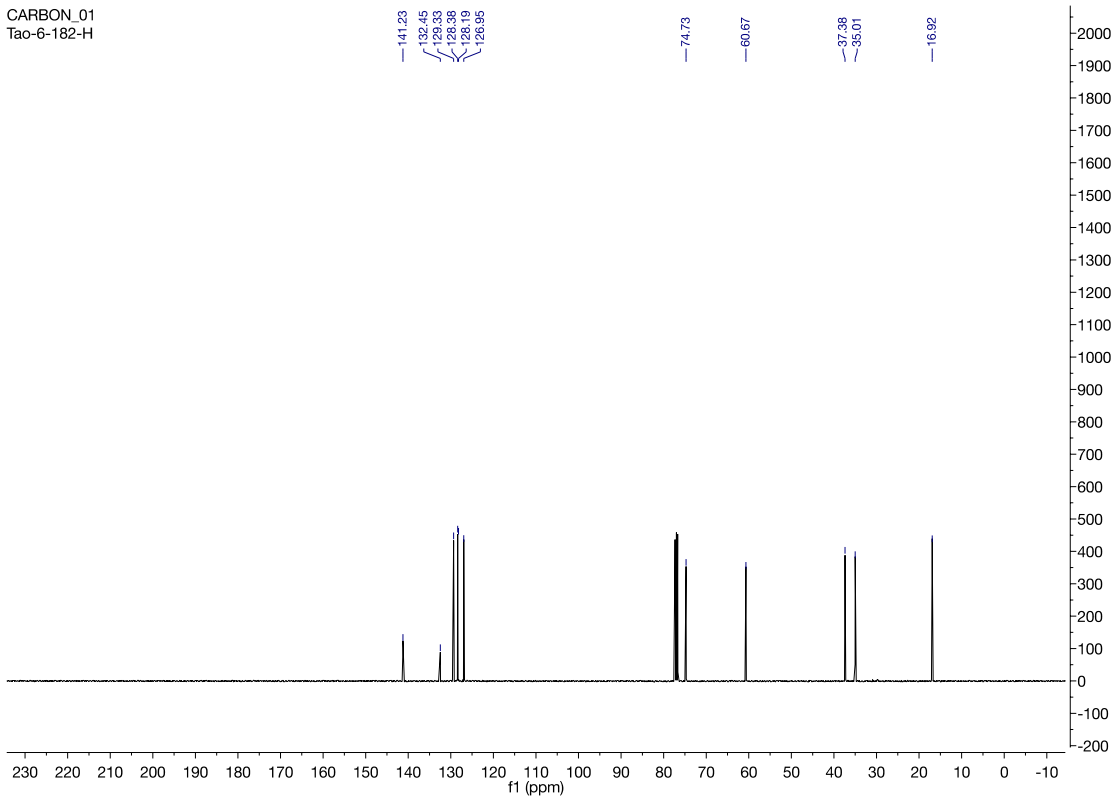

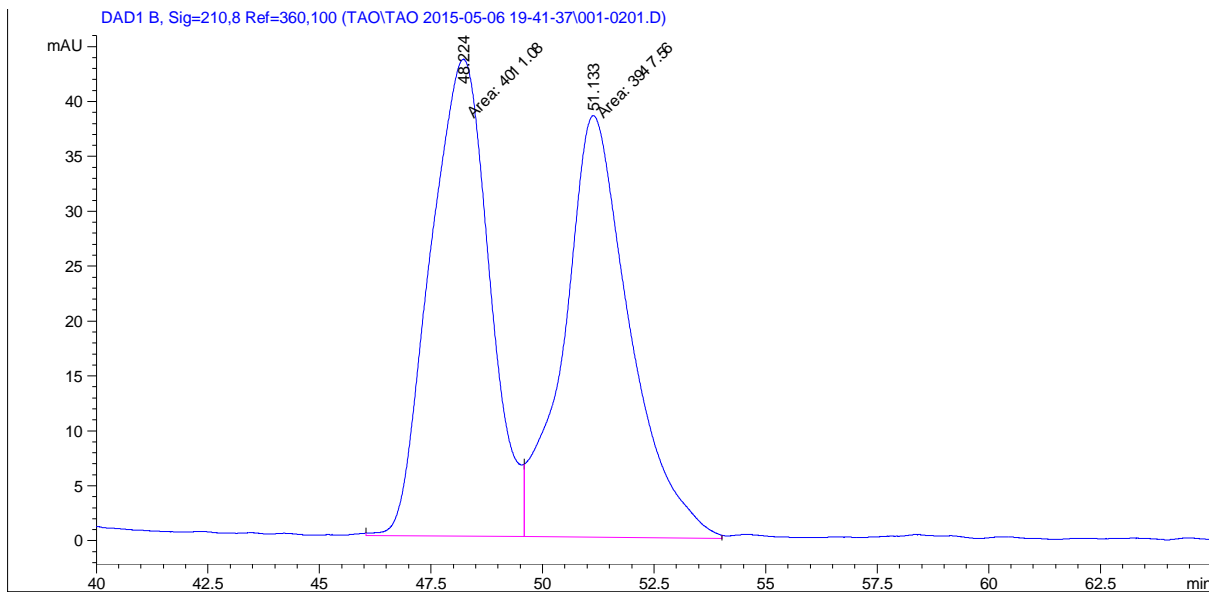

| Peak # | RetTime [min] | Type | Width [min] | Area [mAU*s] | Height [mAU] | Area %  |
|--------|---------------|------|-------------|--------------|--------------|---------|
| 1      | 48.224        | MF   | 1.5389      | 4011.08301   | 43.44012     | 50.3991 |
| 2      | 51.133        | FM   | 1.7133      | 3947.55981   | 38.40157     | 49.6009 |

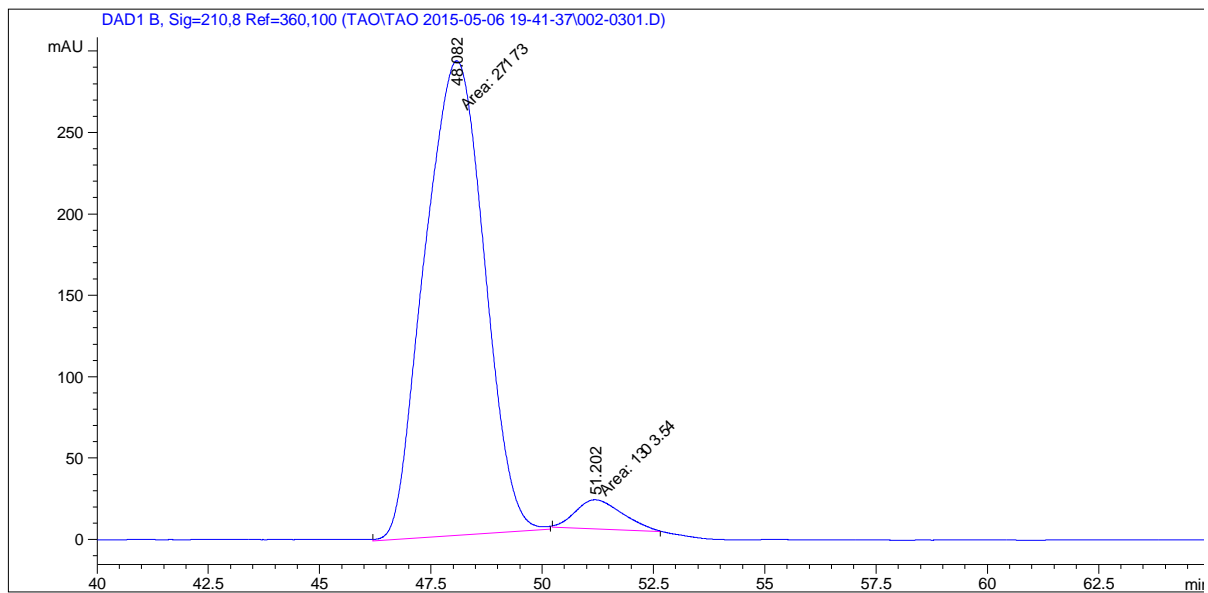

| Peak # | RetTime [min] | Type | Width [min] | Area [mAU*s] | Height [mAU] | Area %  |
|--------|---------------|------|-------------|--------------|--------------|---------|
| 1      | 48.082        | MM   | 1.5540      | 2.71730e4    | 291.42899    | 95.4224 |
| 2      | 51.202        | MM   | 1.2196      | 1303.53503   | 17.81412     | 4.5776  |

**(3*S*,4*S*,*E*)-3,5-dimethyl-6-phenylhex-5-ene-1,4-diol (5i).**

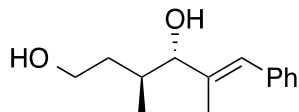

The residue was subjected to flash column chromatography for purification to furnish the title compound (29.7 mg, 72%, *dr* = >20:1) as a colorless liquid.

**R<sub>f</sub>** = 0.3 (50% EtOAc/Hexanes).

Spectral data is reported for the major isomer.

**<sup>1</sup>H NMR** (400 MHz, CDCl<sub>3</sub>): δ 7.36 – 7.31 (m, 2H), 7.30 – 7.27 (m, 2H), 7.27 – 7.18 (m, 1H), 6.47 (s, 1H), 3.88 (d, *J* = 8.3 Hz, 1H), 3.85 – 3.78 (m, 1H), 3.69 (ddd, *J* = 10.8, 8.1, 4.5 Hz, 1H), 2.76 (s, 2H), 1.97 – 1.88 (m, 1H), 1.87 (d, *J* = 1.4 Hz, 3H), 1.86 – 1.79 (m, 1H), 1.68 – 1.58 (m, 1H), 0.90 (d, *J* = 6.8 Hz, 3H).

**<sup>13</sup>C NMR** (100 MHz, CDCl<sub>3</sub>): δ 139.37, 137.42, 128.97, 128.12, 127.52, 126.51, 83.42, 61.24, 36.78, 34.64, 17.82, 12.98.

**LRMS** (CI) Calcd. for C<sub>14</sub>H<sub>20</sub>NaO<sub>2</sub> [M+Na]<sup>+</sup>: 243, Found: 243.

**FTIR** (neat): 2959, 2923, 1147, 1378, 1057, 1008, 750, 699 cm<sup>-1</sup>.

**HPLC** (Chiralcel OD-H column, hexanes:*i*-PrOH = 95:05, 1 mL/min, 254 nm), ee = 90%.

[α]<sub>D</sub><sup>25</sup> = + 42.4 (c = 0.11, CHCl<sub>3</sub>)

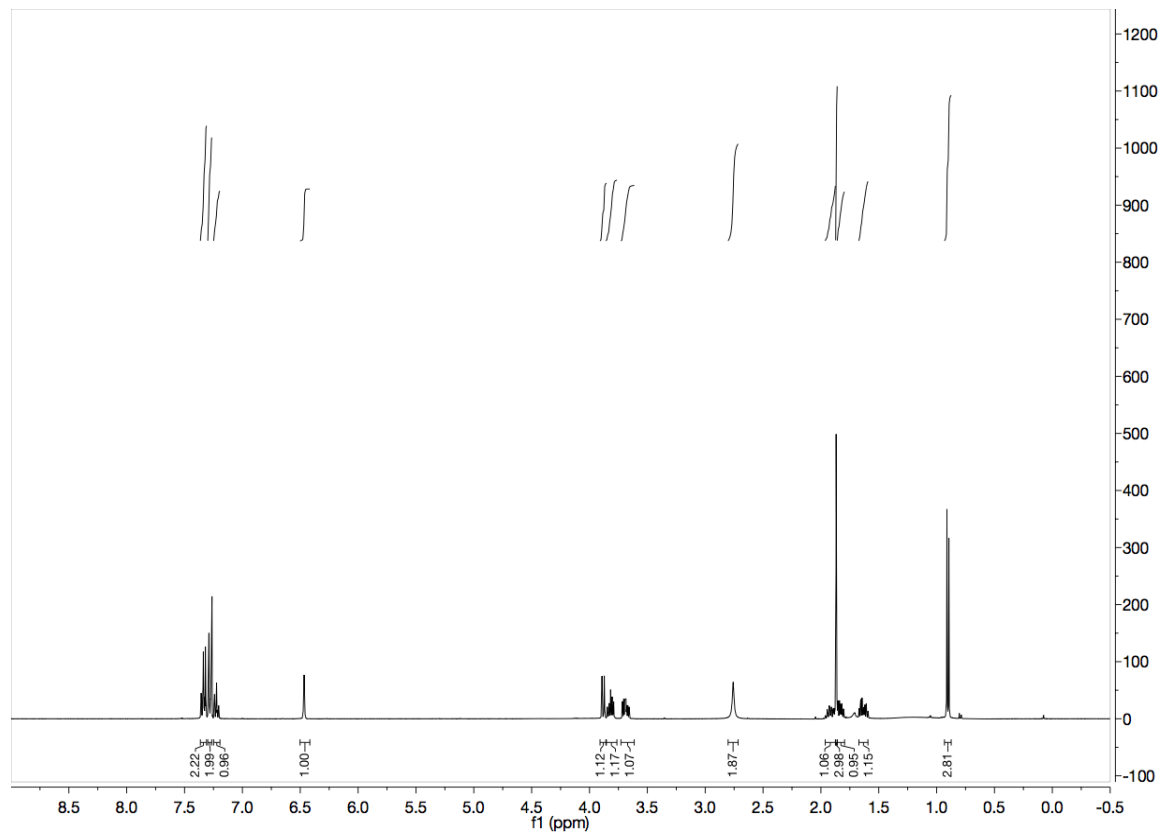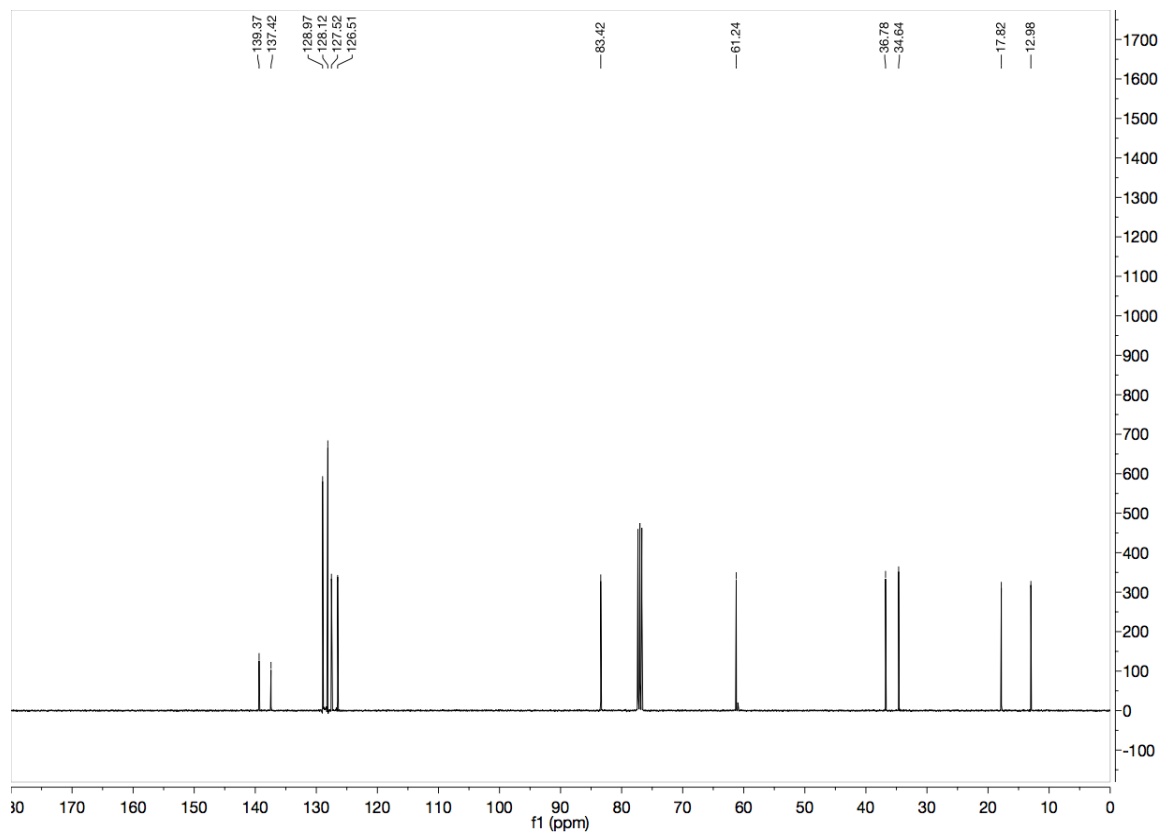

DAD1 A, Sig=254,4 Ref=360,100 (TAOTAO\_1SAMPLE 2015-07-10 17-25-15\010-0201.D)

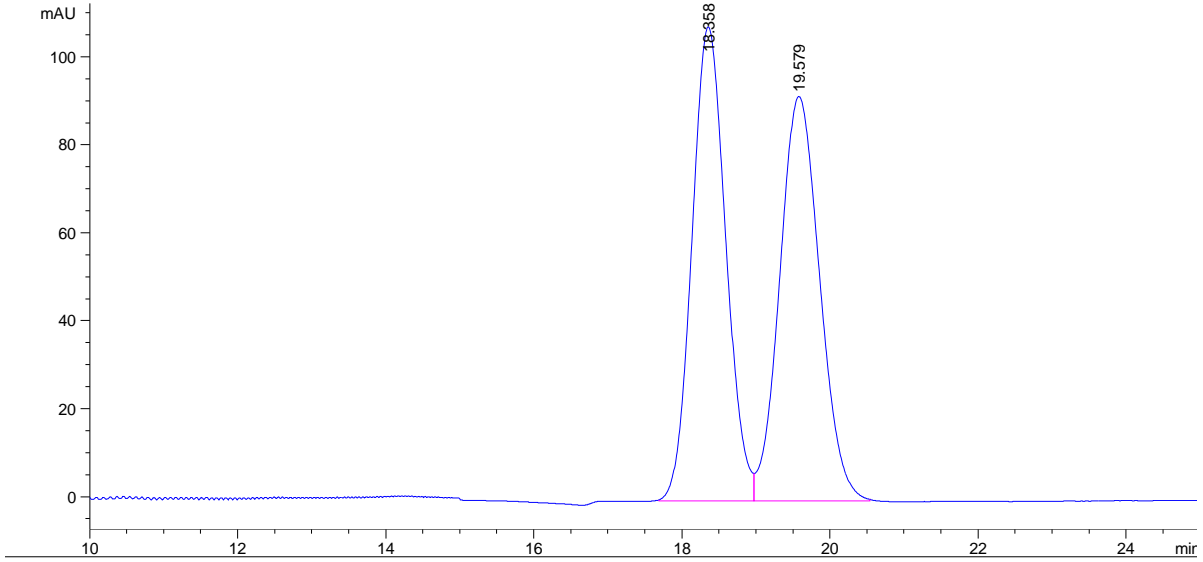

| Peak # | RetTime [min] | Type | Width [min] | Area [mAU*s] | Height [mAU] | Area %  |
|--------|---------------|------|-------------|--------------|--------------|---------|
| 1      | 18.358        | BV   | 0.5027      | 3442.22559   | 107.74624    | 49.9694 |
| 2      | 19.579        | VB   | 0.5774      | 3446.44556   | 91.92495     | 50.0306 |

DAD1 A, Sig=254,4 Ref=360,100 (TAOTAO\_1SAMPLE 2015-07-10 17-25-15\010-0301.D)

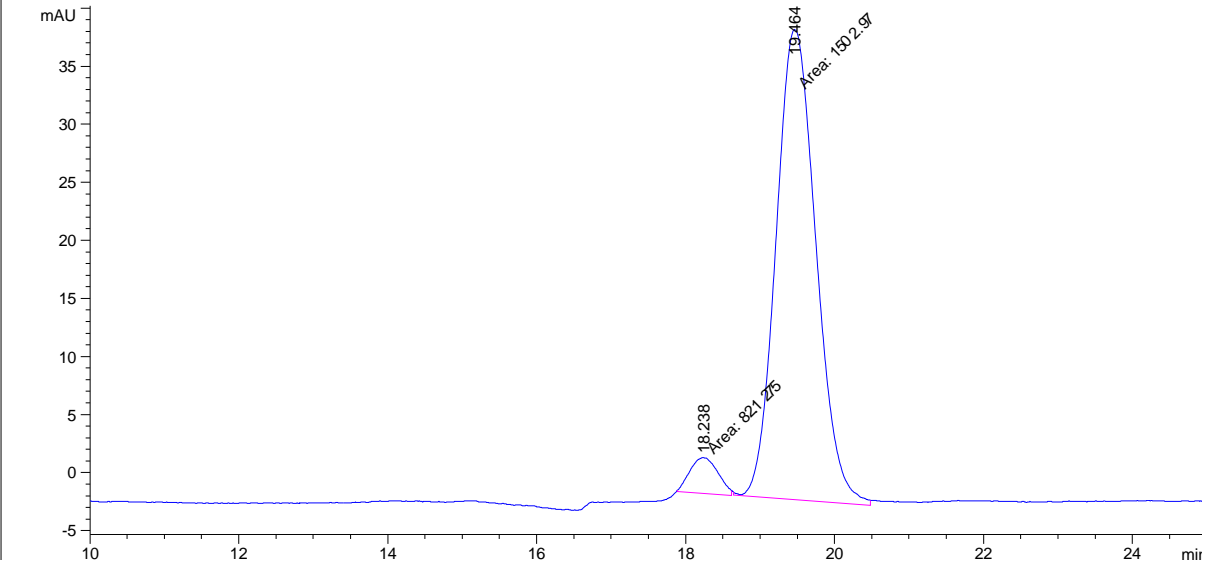

| Peak # | RetTime [min] | Type | Width [min] | Area [mAU*s] | Height [mAU] | Area %  |
|--------|---------------|------|-------------|--------------|--------------|---------|
| 1      | 18.238        | MM   | 0.4430      | 82.12747     | 3.08987      | 5.1812  |
| 2      | 19.464        | MM   | 0.6189      | 1502.96655   | 40.47425     | 94.8188 |

**(3*S*,4*S*)-3,6-dimethylhept-5-ene-1,4-diol (5j).**

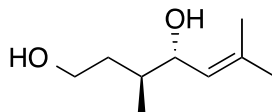

The residue was subjected to flash column chromatography for purification to furnish the title compound (23.1 mg, 73%, *dr* = >20:1) as a colorless oil.

**R<sub>f</sub>** = 0.3 (50% EtOAc/Hexanes).

Spectral data is reported for the major isomer.

**<sup>1</sup>H NMR** (400 MHz, CDCl<sub>3</sub>): δ 5.19 (dp, *J* = 9.0, 1.4 Hz, 1H), 4.12 (dd, *J* = 9.0, 7.2 Hz, 1H), 3.83 – 3.71 (m, 1H), 3.69 – 3.57 (m, 1H), 2.40 (s, 2H), 1.79 – 1.65 (m, 8H), 1.62 – 1.51 (m, 1H), 0.86 (d, *J* = 6.7 Hz, 3H).

**<sup>13</sup>C NMR** (100 MHz, CDCl<sub>3</sub>): δ 136.01, 126.76, 73.00, 61.23, 37.63, 36.76, 26.04, 18.52, 16.66.

**LRMS** (CI) Calcd. for C<sub>9</sub>H<sub>18</sub>NaO<sub>2</sub> [M+Na]<sup>+</sup>: 181, Found: 181.

**FTIR** (neat): 3016, 2970, 1739, 1366, 1229, 1217 cm<sup>-1</sup>.

**HPLC** (Chiralcel AD-H column, hexanes:*i*-PrOH = 95:5, 1 mL/min, 210 nm), ee = 94%.

**[α]<sub>D</sub><sup>25</sup>** = + 3.8 (c = 0.61, CHCl<sub>3</sub>)

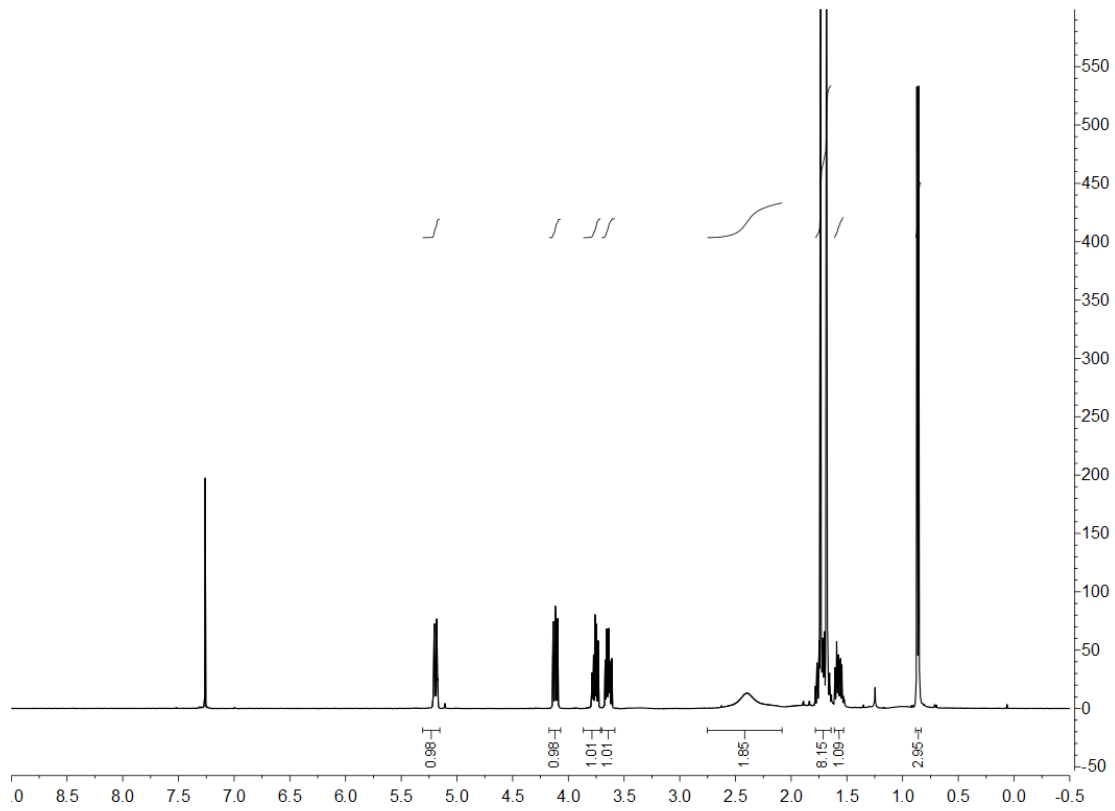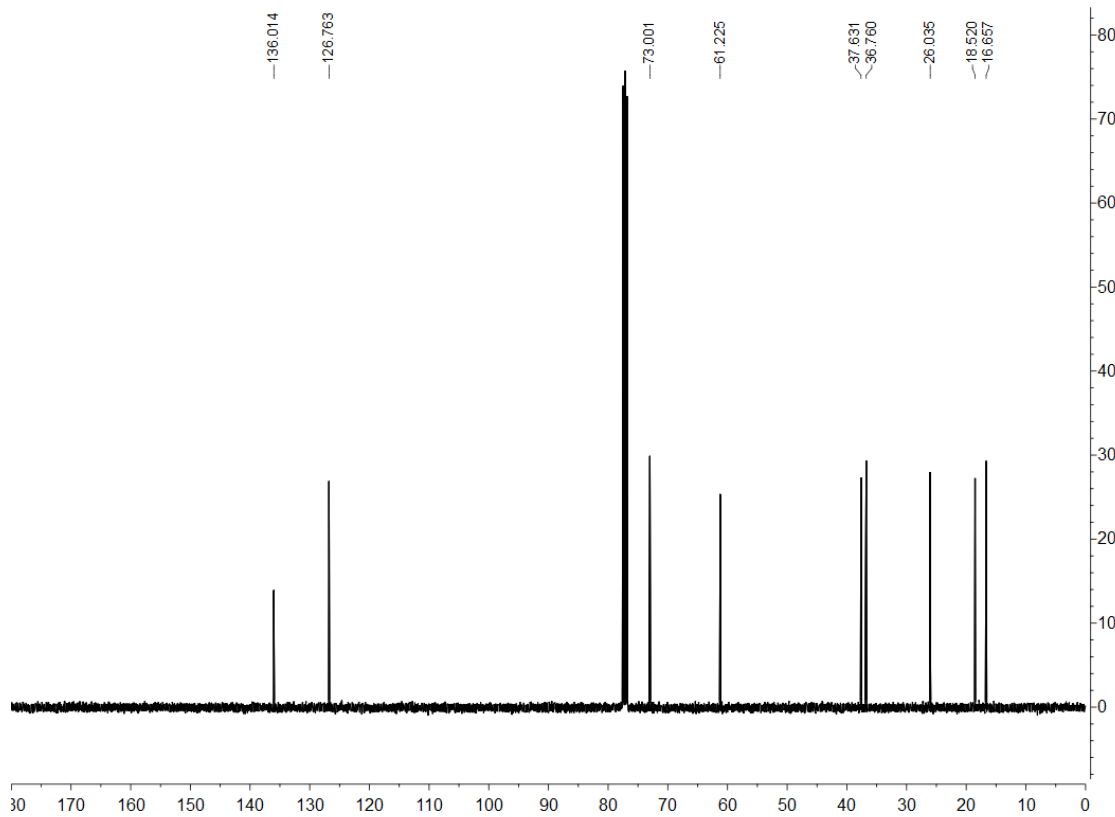



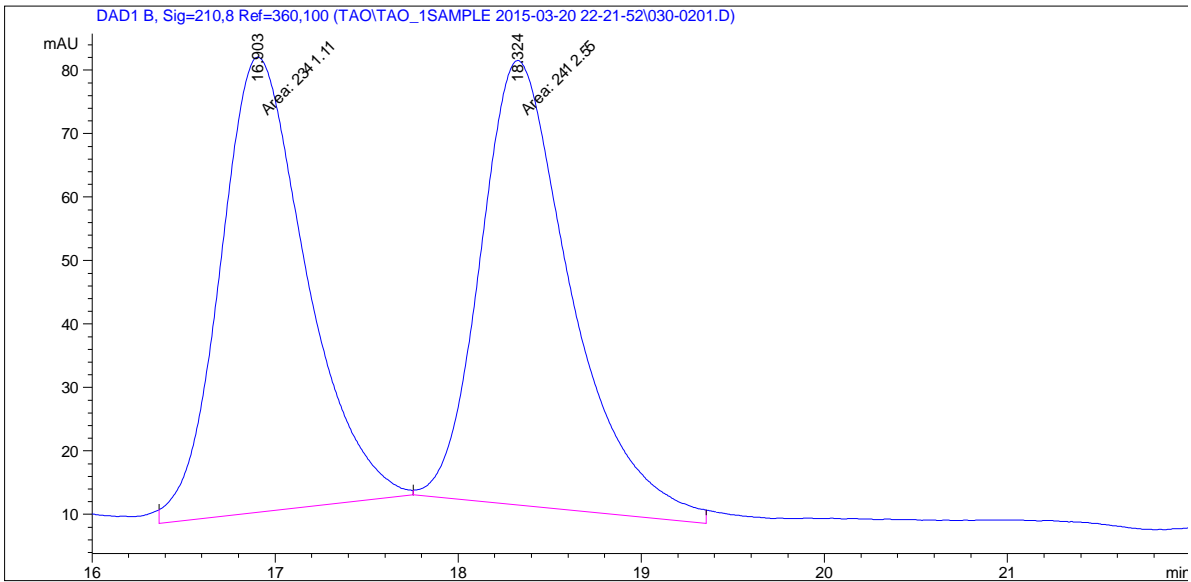

| Peak # | RetTime [min] | Type | Width [min] | Area [mAU*s] | Height [mAU] | Area %  |
|--------|---------------|------|-------------|--------------|--------------|---------|
| 1      | 16.903        | MM   | 0.5440      | 2341.11060   | 71.72882     | 49.2486 |
| 2      | 18.324        | MM   | 0.5742      | 2412.55249   | 70.02545     | 50.7514 |

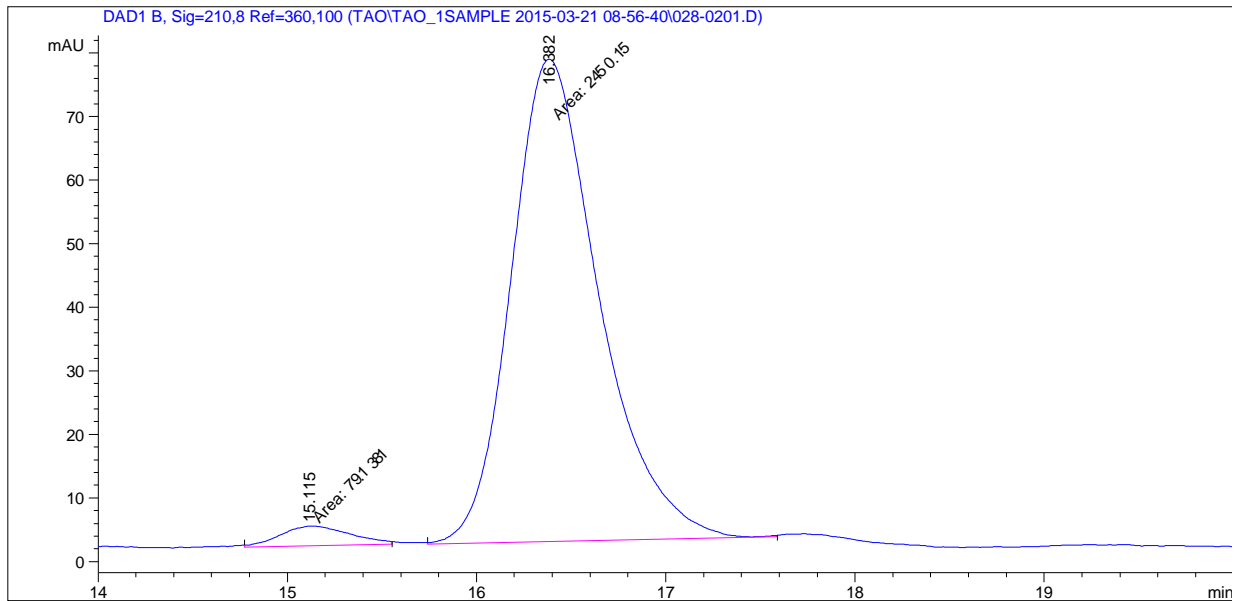

| Peak # | RetTime [min] | Type | Width [min] | Area [mAU*s] | Height [mAU] | Area %  |
|--------|---------------|------|-------------|--------------|--------------|---------|
| 1      | 15.115        | MM   | 0.4262      | 79.13813     | 3.09482      | 3.1289  |
| 2      | 16.382        | MM   | 0.5384      | 2450.14819   | 75.85360     | 96.8711 |

**(3*S*,4*S*,*E*)-3,6,10-trimethylundeca-5,9-diene-1,4-diol (5k).**

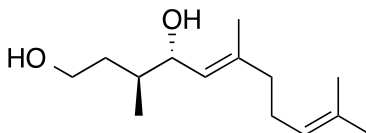

The residue was subjected to flash column chromatography for purification to furnish the title compound (42.3 mg, 72%, *dr* = >20:1) as a colorless oil.

***R*<sub>f</sub>** = 0.3 (50% EtOAc/Hexanes).

Spectral data is reported for the major isomer.

**<sup>1</sup>H NMR** (400 MHz, CDCl<sub>3</sub>): δ 5.19 (dq, *J* = 9.1, 1.3 Hz, 1H), 5.10 – 5.03 (m, 1H), 4.13 (dd, *J* = 9.0, 7.3 Hz, 1H), 3.76 (ddd, *J* = 11.0, 6.1, 5.0 Hz, 1H), 3.70 – 3.60 (m, 1H), 2.14 – 2.00 (m, 4H), 1.81 – 1.69 (m, 2H), 1.68 – 1.66 (m, 6H), 1.60 (s, 3H), 1.58 – 1.54 (m, 1H), 0.86 (d, *J* = 6.7 Hz, 3H).

**<sup>13</sup>C NMR** (100 MHz, CDCl<sub>3</sub>): δ 139.39, 131.85, 126.69, 124.07, 72.92, 61.27, 39.86, 37.69, 36.85, 26.48, 25.83, 17.84, 16.86, 16.62.

**LRMS** (CI) Calcd. for C<sub>14</sub>H<sub>26</sub>NaO<sub>2</sub> [M+Na]<sup>+</sup>: 249, Found: 249.

**FTIR** (neat): 2970, 1739, 1448, 1366, 1229, 1217 cm<sup>-1</sup>.

**HPLC** (Chiralcel OD-H column/OD-H column, hexanes:*i*-PrOH = 95:5, 1 mL/min, 210 nm), ee = 96%.

**[α]<sub>D</sub><sup>25</sup>** = - 6.8(c = 0.54, CHCl<sub>3</sub>)

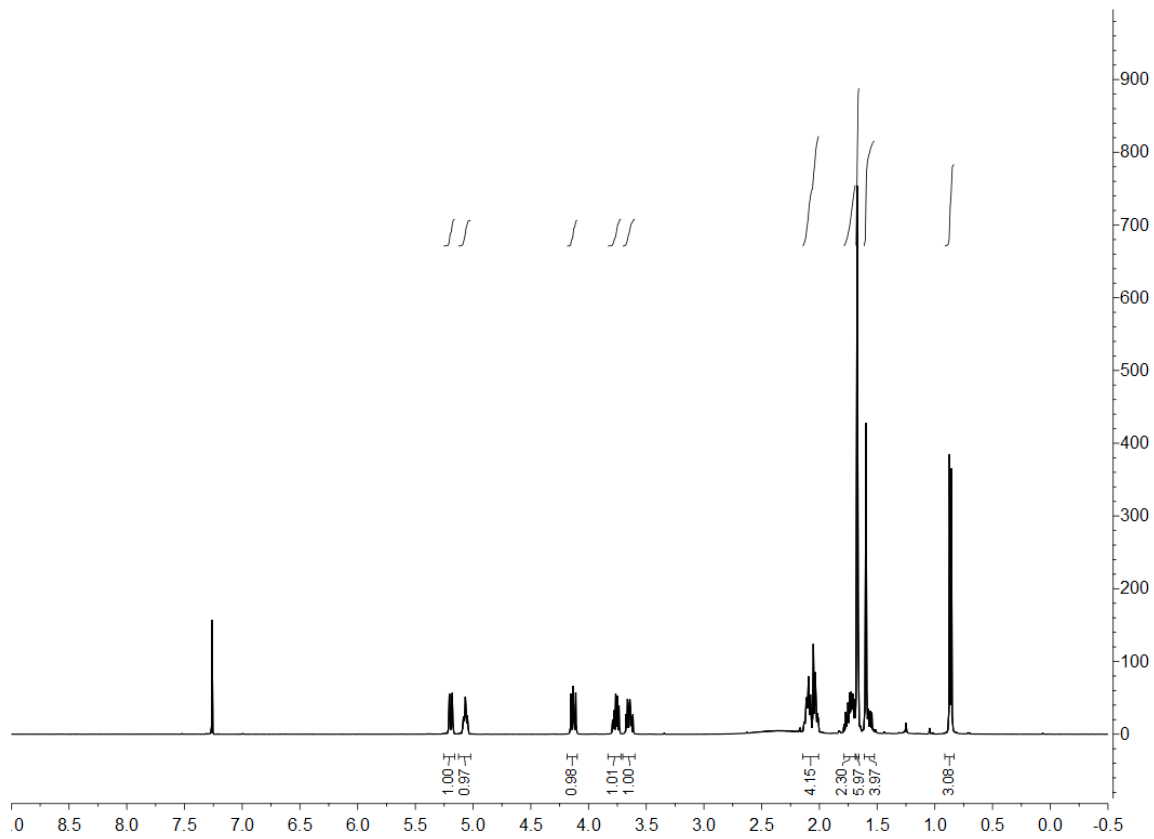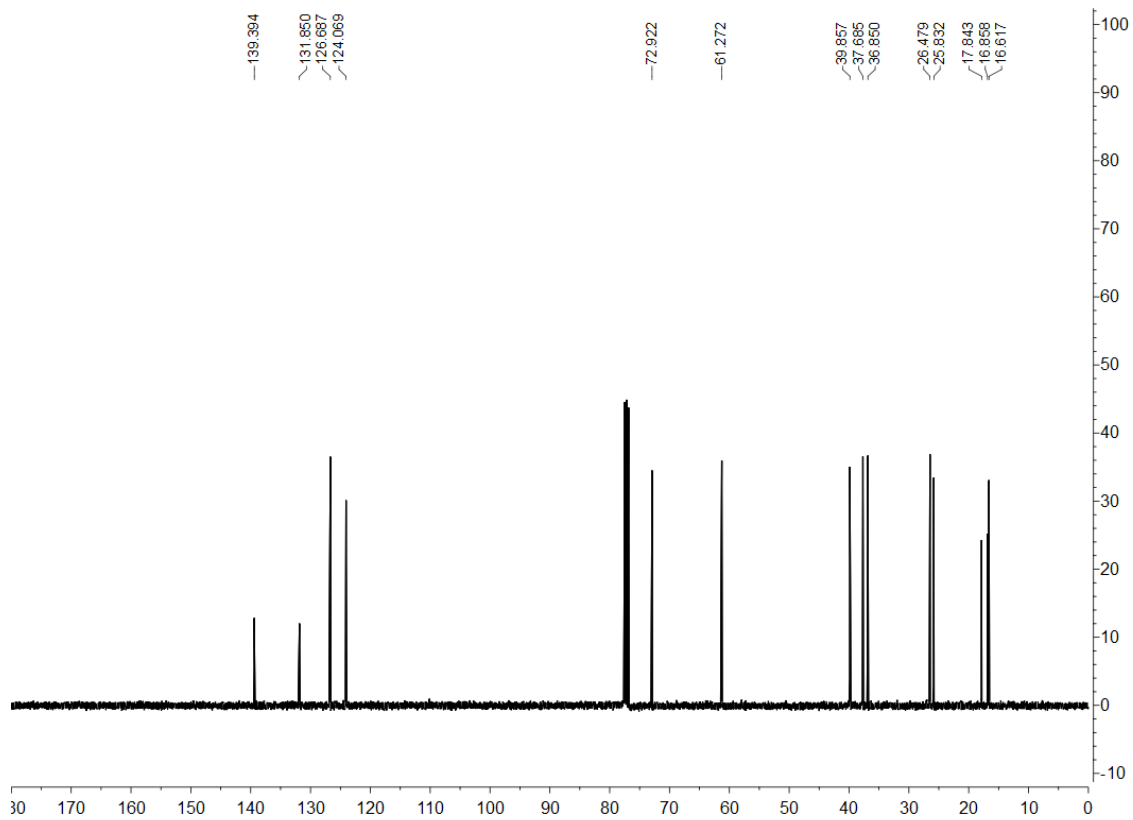

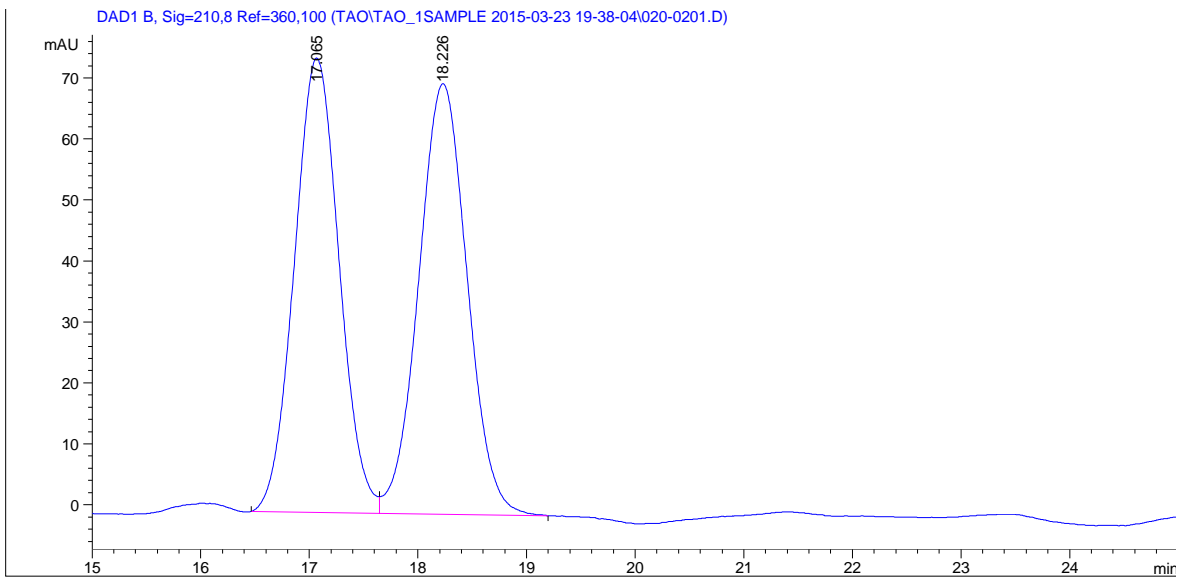

| Peak # | RetTime [min] | Type | Width [min] | Area [mAU*s] | Height [mAU] | Area %  |
|--------|---------------|------|-------------|--------------|--------------|---------|
| 1      | 17.065        | BV   | 0.4444      | 2136.06885   | 74.53375     | 49.3446 |
| 2      | 18.226        | VB   | 0.4783      | 2192.80786   | 70.60277     | 50.6554 |

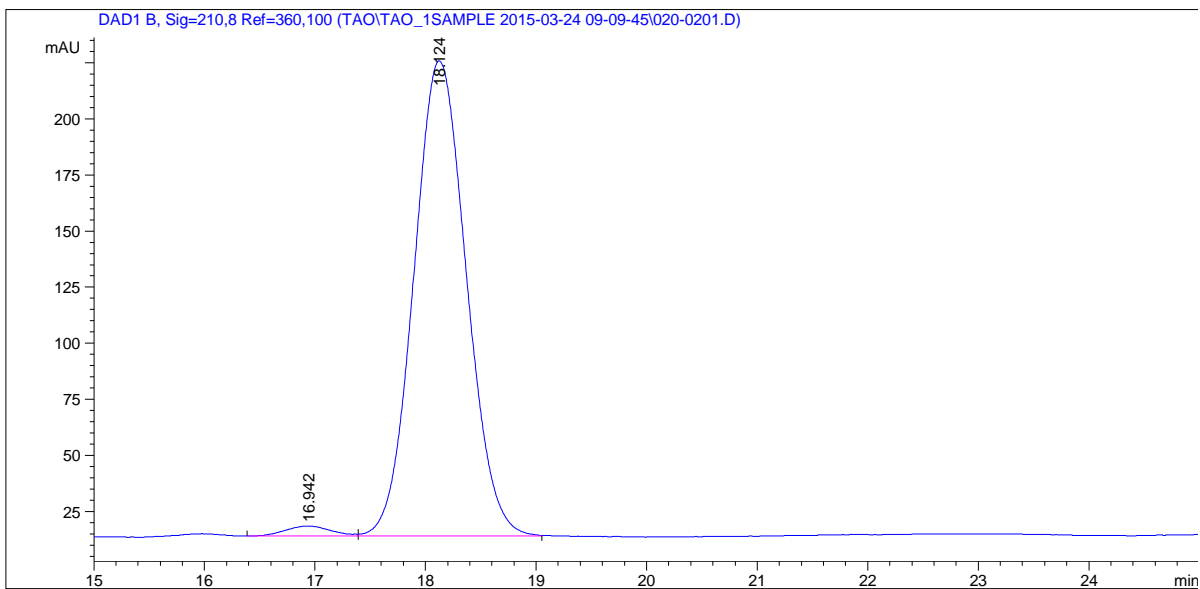

| Peak # | RetTime [min] | Type | Width [min] | Area [mAU*s] | Height [mAU] | Area %  |
|--------|---------------|------|-------------|--------------|--------------|---------|
| 1      | 16.942        | BV   | 0.3495      | 126.60713    | 4.42887      | 1.7824  |
| 2      | 18.124        | VB   | 0.5183      | 6976.73682   | 211.78230    | 98.2176 |

**(3*S*,4*S*,*E*)-3-methyl-6-phenylhex-5-ene-1,4-diol (5I).**

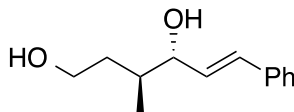

The residue was subjected to flash column chromatography for purification to furnish the title compound (29.7 mg, 72%, *dr* = >20:1) as a white solid.

**R<sub>f</sub>** = 0.3 (50% EtOAc/Hexanes).

Spectral data is reported for the major isomer.

**<sup>1</sup>H NMR** (400 MHz, CDCl<sub>3</sub>): δ 7.41 – 7.20 (m, 5H), 6.57 (d, *J* = 15.9 Hz, 1H), 6.22 (dd, *J* = 15.9, 7.1 Hz, 1H), 4.08 (t, *J* = 6.9 Hz, 1H), 3.83 – 3.75 (m, 1H), 3.71 – 3.63 (m, 1H), 2.59 (s, 2H), 1.91 – 1.71 (m, 2H), 1.68 – 1.55 (m, 1H), 0.97 (d, *J* = 6.9 Hz, 3H).

**<sup>13</sup>C NMR** (100 MHz, CDCl<sub>3</sub>): δ 136.81, 131.54, 131.15, 128.71, 127.80, 126.59, 60.87, 37.18, 36.17, 16.79.

**LRMS** (CI) Calcd. for C<sub>13</sub>H<sub>18</sub>NaO<sub>2</sub> [M+Na]<sup>+</sup>: 229, Found: 229.

**FTIR** (neat): 3260, 3025, 2970, 2944, 1739, 1449, 1366, 1228, 1217, 1011, 970, 693 cm<sup>-1</sup>.

**HPLC** (Chiralcel OD-H column, hexanes:*i*-PrOH = 90:10, 1 mL/min, 254 nm), ee = 93%.

**[α]<sub>D</sub><sup>25</sup>** = + 8.2 (c = 0.65, CHCl<sub>3</sub>)

**M.P.** 84.5-86 °C

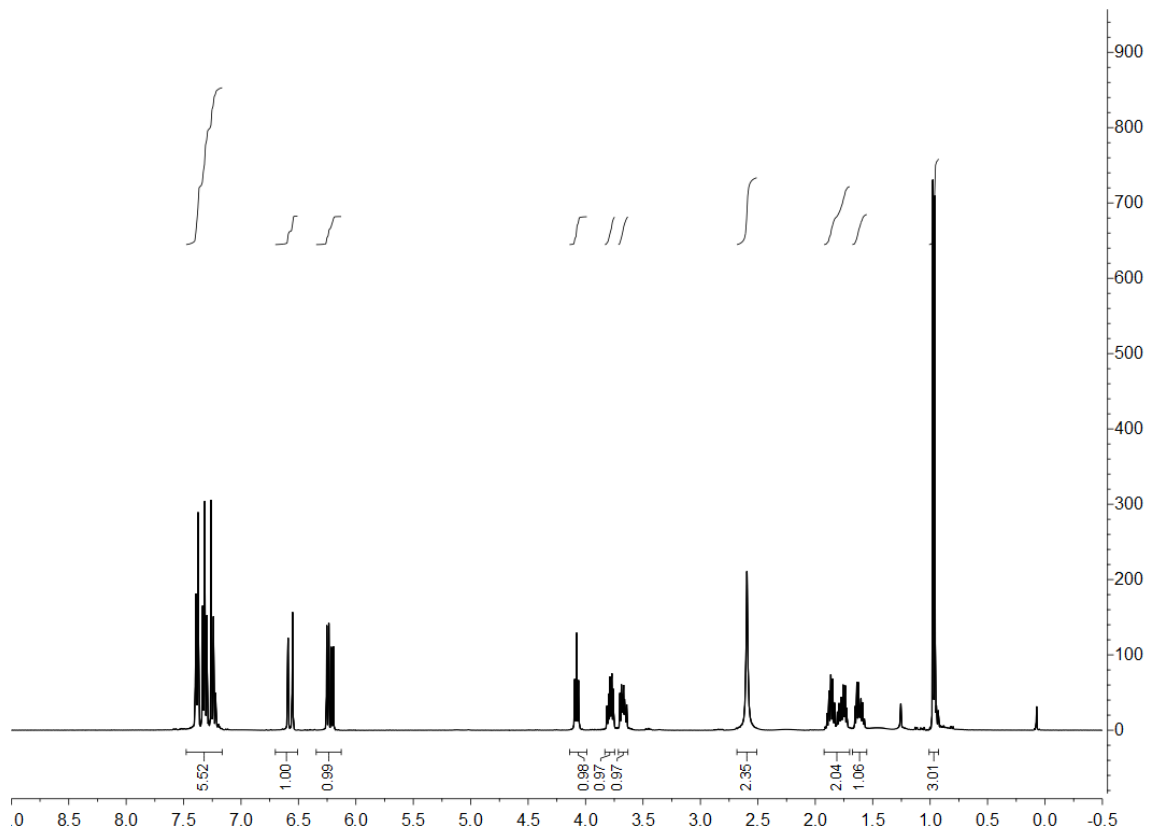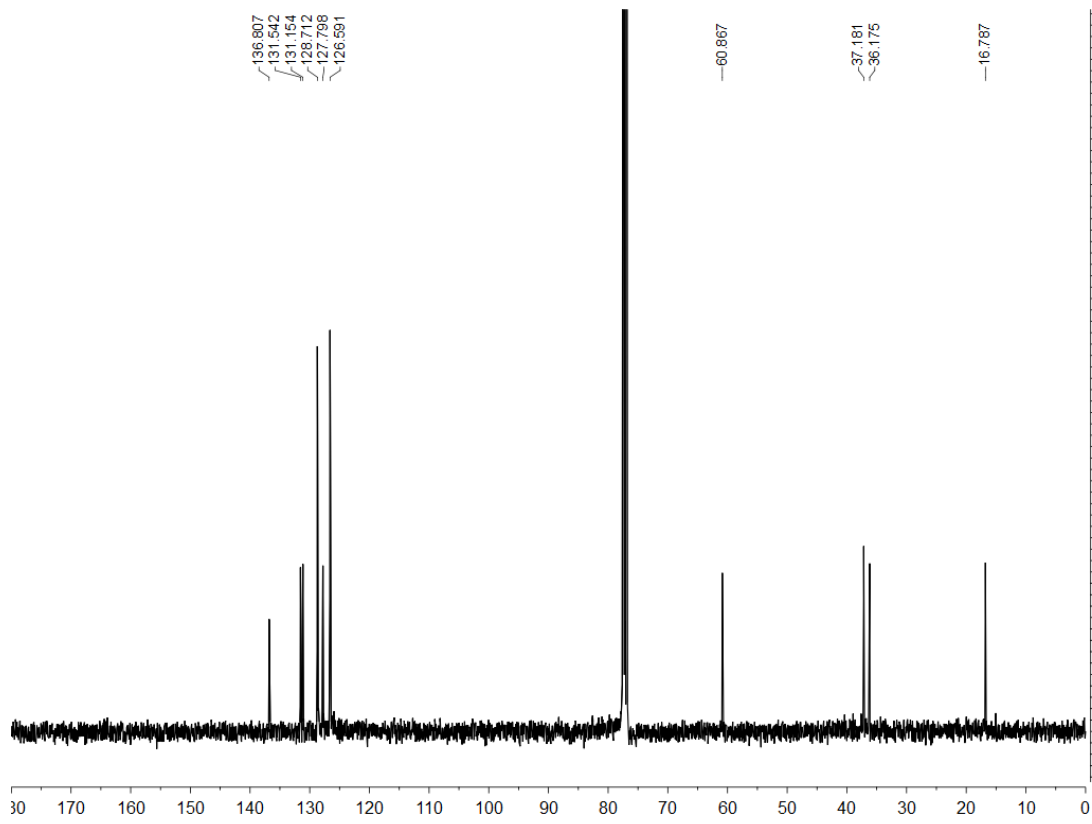

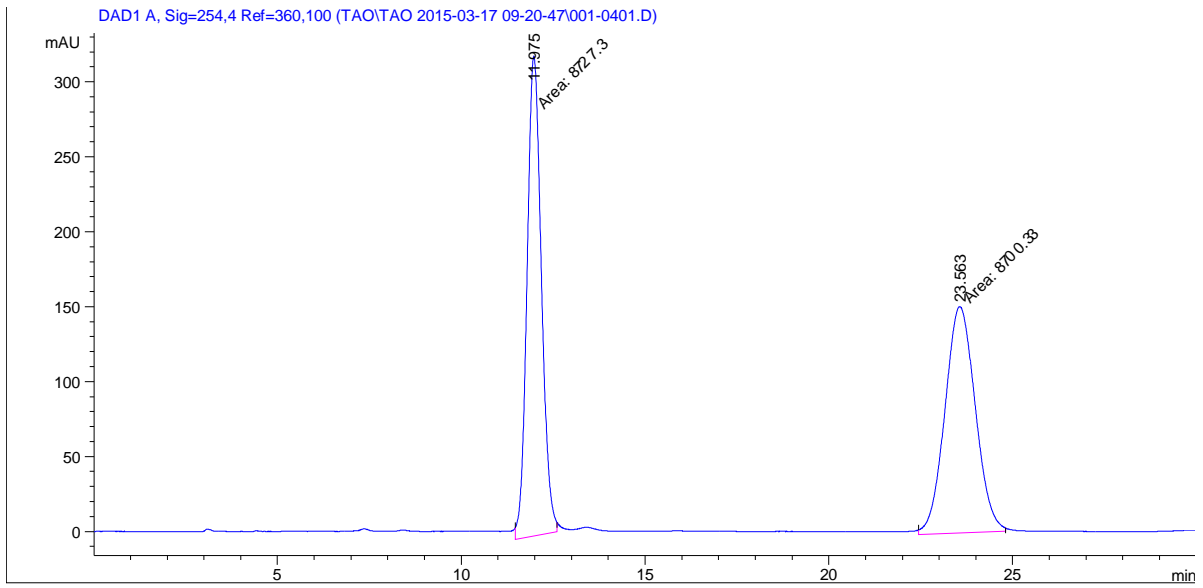

| Peak # | RetTime [min] | Type | Width [min] | Area [mAU*s] | Height [mAU] | Area %  |
|--------|---------------|------|-------------|--------------|--------------|---------|
| 1      | 11.975        | MM   | 0.4547      | 8727.30273   | 319.92133    | 50.0774 |
| 2      | 23.563        | MM   | 0.9592      | 8700.32813   | 151.16803    | 49.9226 |

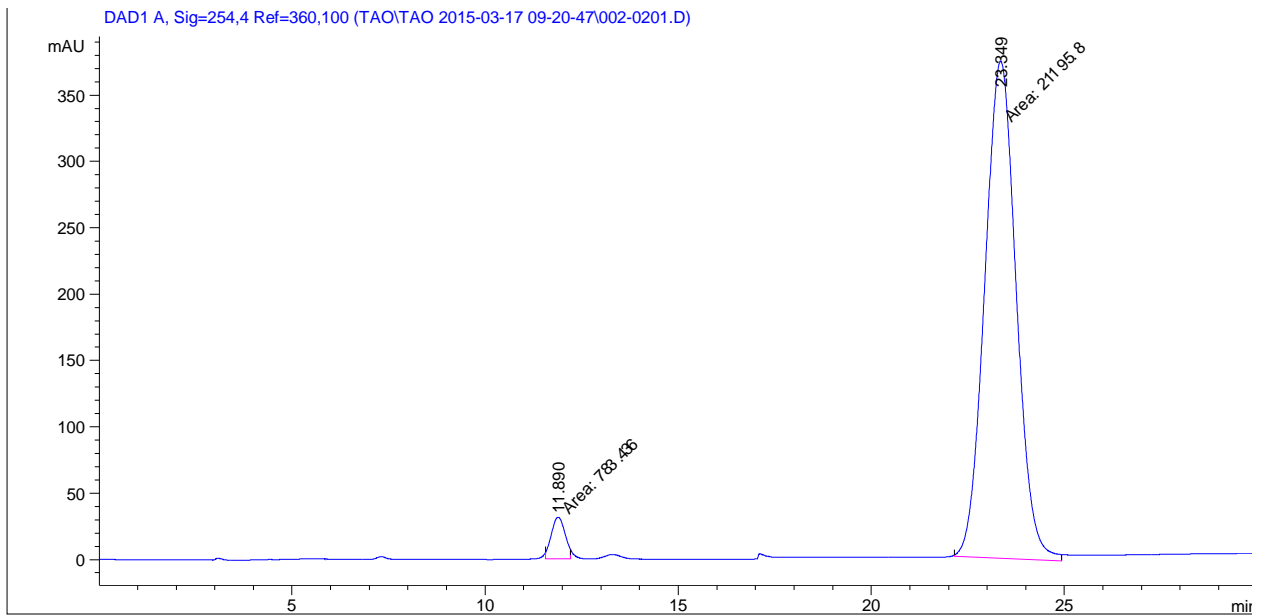

| Peak # | RetTime [min] | Type | Width [min] | Area [mAU*s] | Height [mAU] | Area %  |
|--------|---------------|------|-------------|--------------|--------------|---------|
| 1      | 11.890        | MM   | 0.4136      | 783.43585    | 31.57117     | 3.5644  |
| 2      | 23.349        | MM   | 0.9433      | 2.11958e4    | 374.49902    | 96.4356 |

**(3*S*,4*R*)-3-methyl-6-phenylhexane-1,4-diol (5m).**

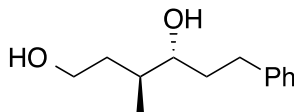

The residue was subjected to flash column chromatography for purification to furnish the title compound (14.5 mg, 0.1 mmol scale, 70%, *dr* = >20:1) as a colorless oil.

**R<sub>f</sub>** = 0.3 (50% EtOAc/Hexanes).

Spectral data is reported for the major isomer.

**<sup>1</sup>H NMR** (400 MHz, CDCl<sub>3</sub>): δ 7.31 – 7.26 (m, 2H), 7.24 – 7.15 (m, 3H), 3.76 (ddd, *J* = 10.6, 6.6, 5.0 Hz, 1H), 3.63 (ddd, *J* = 10.6, 7.0, 5.0 Hz, 1H), 3.52 – 3.40 (m, 1H), 2.85 (ddd, *J* = 13.7, 9.9, 5.5 Hz, 1H), 2.72 – 2.56 (m, 3H), 1.92 – 1.51 (m, 5H), 0.95 (d, *J* = 6.8 Hz, 3H).

**<sup>13</sup>C NMR** (100 MHz, CDCl<sub>3</sub>): δ 142.40, 128.57, 128.53, 125.93, 75.34, 60.50, 36.76, 36.39, 35.34, 32.45, 16.62.

**LRMS** (CI) Calcd. for C<sub>13</sub>H<sub>20</sub>NaO<sub>2</sub> [M+Na]<sup>+</sup>: 231, Found: 231.

**FTIR** (neat): 3026, 2970, 2946, 1739, 1454, 1366, 1229, 1217, 1052, 698 cm<sup>-1</sup>.

**HPLC** (Chiralcel OD-H column, hexanes:*i*-PrOH = 95:5, 1.0 mL/min, 210 nm), ee = 90%.

**[α]<sub>D</sub><sup>25</sup>** = + 17.8 (c = 0.73, CHCl<sub>3</sub>)



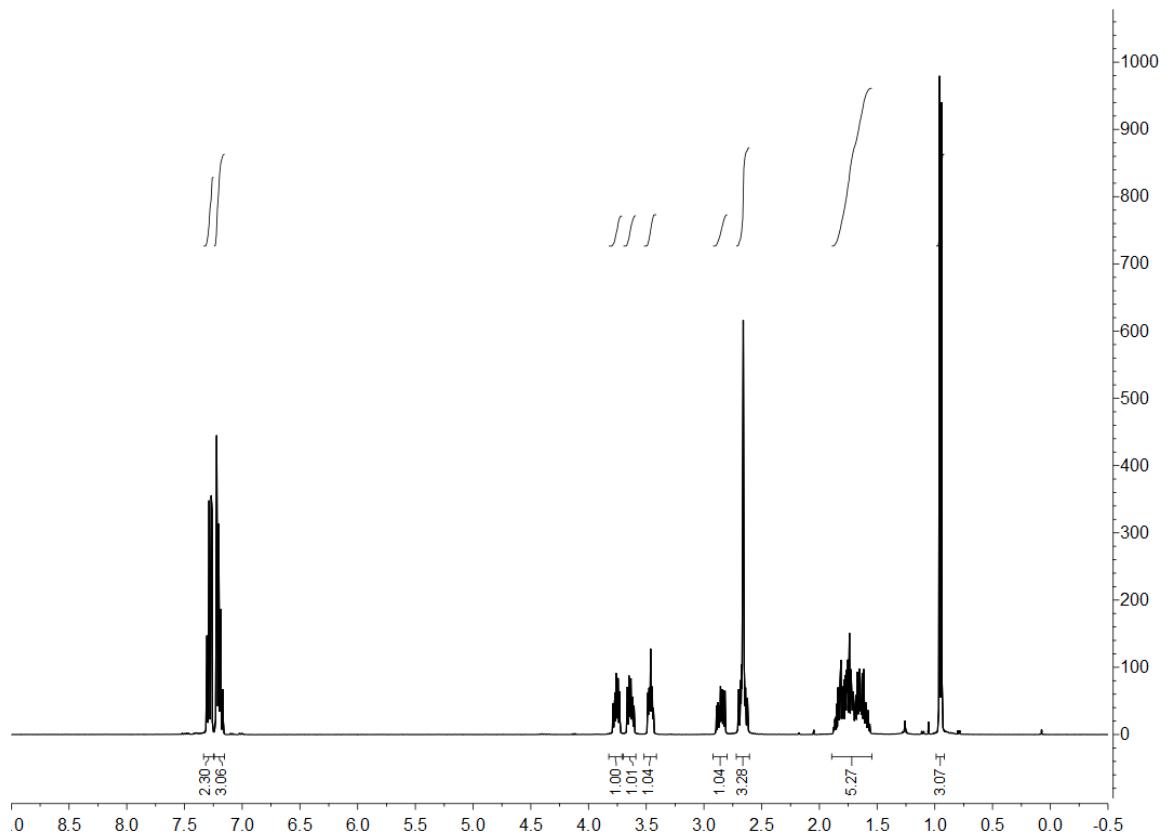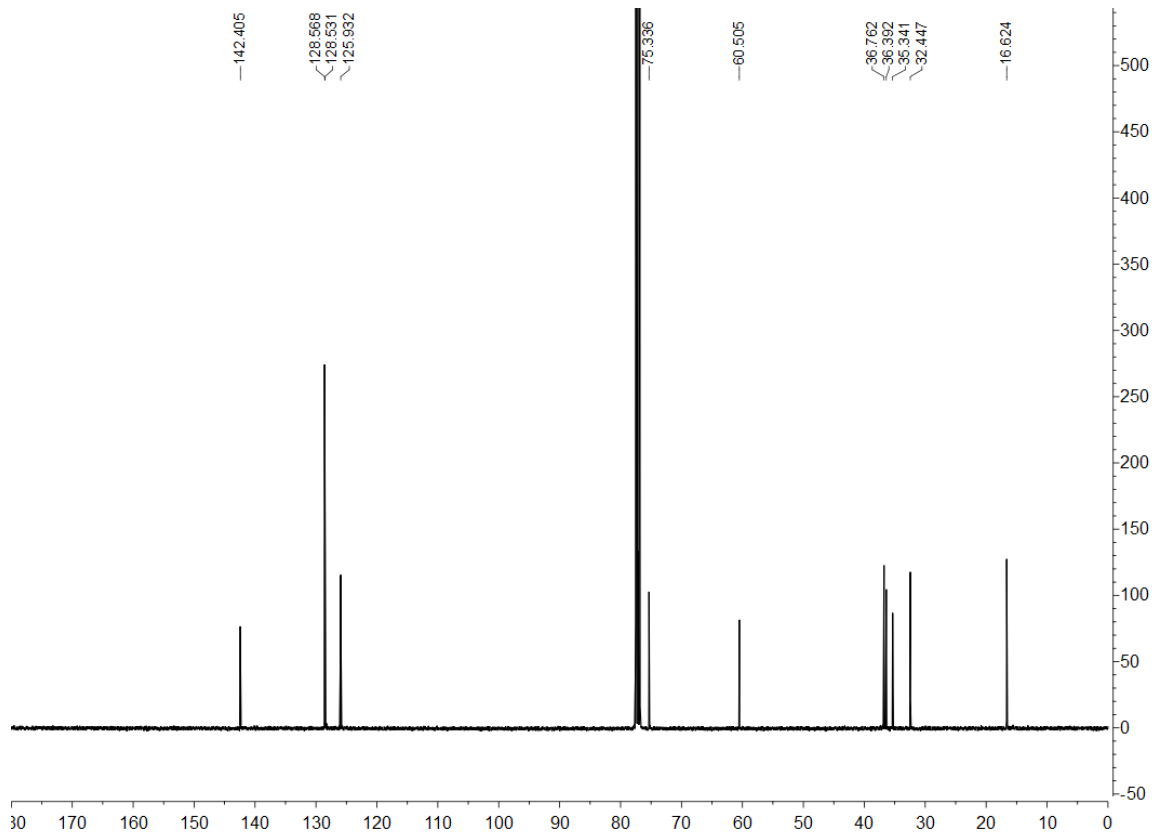

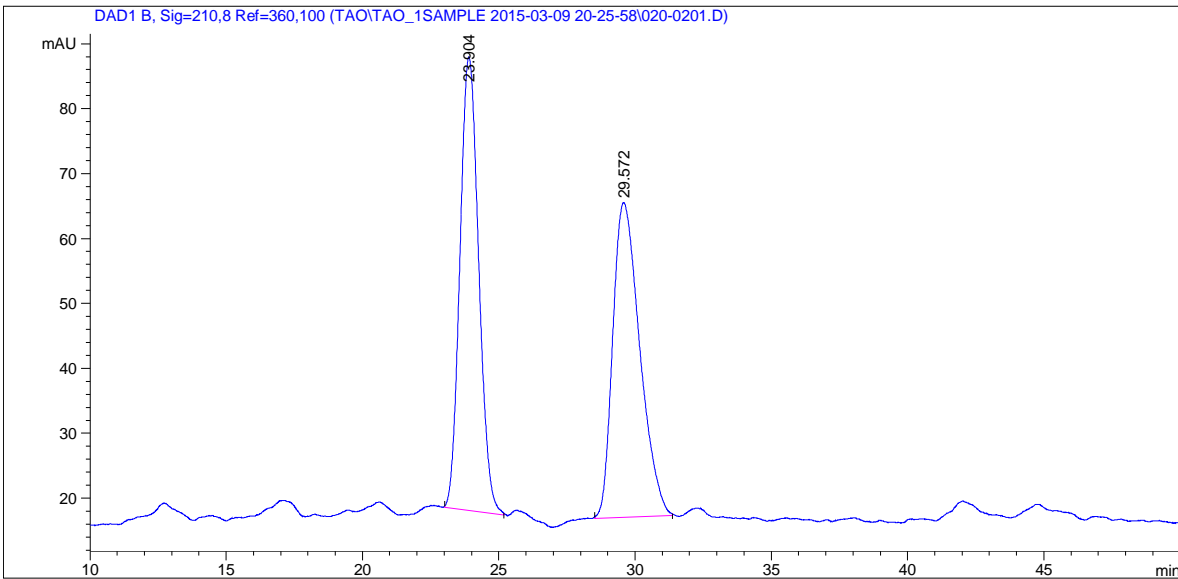

| Peak # | RetTime [min] | Type | Width [min] | Area [mAU*s] | Height [mAU] | Area %  |
|--------|---------------|------|-------------|--------------|--------------|---------|
| 1      | 23.904        | BB   | 0.6953      | 3334.83179   | 69.80979     | 50.0286 |
| 2      | 29.572        | BB   | 0.8201      | 3331.01636   | 48.44849     | 49.9714 |

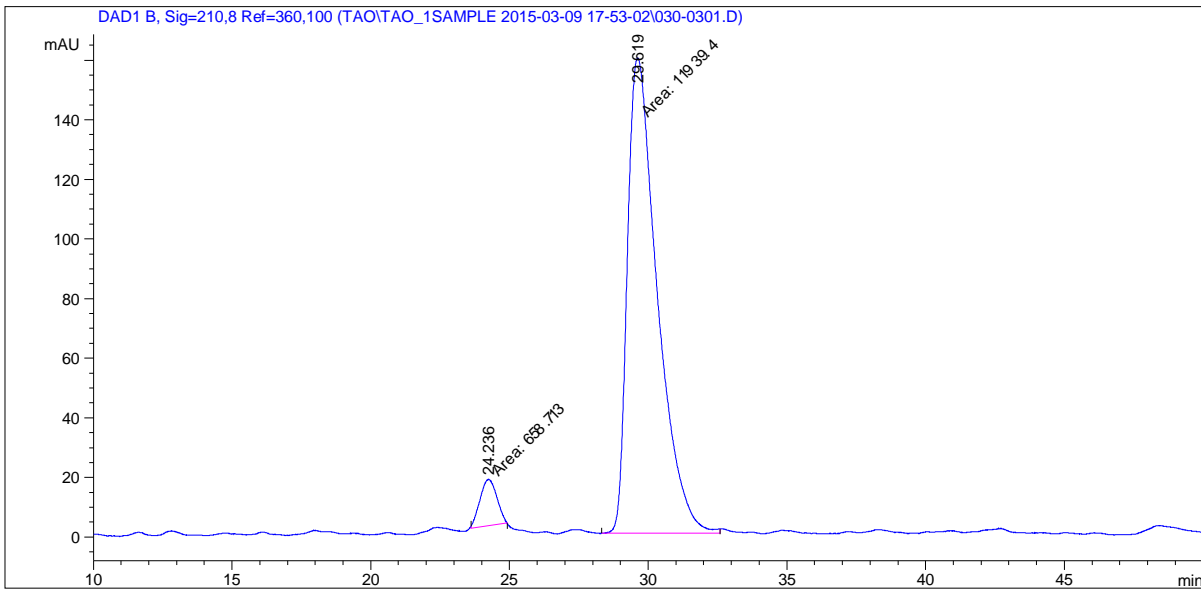

| Peak # | RetTime [min] | Type | Width [min] | Area [mAU*s] | Height [mAU] | Area %  |
|--------|---------------|------|-------------|--------------|--------------|---------|
| 1      | 24.236        | MM   | 0.7041      | 658.71326    | 15.59339     | 5.2287  |
| 2      | 29.619        | MM   | 1.2478      | 1.19394e4    | 159.47311    | 94.7713 |

**(3*S*,4*R*)-3-methyldecane-1,4-diol (5n).**

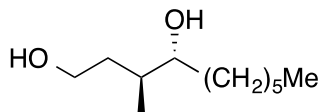

The residue was subjected to flash column chromatography for purification to furnish the title compound (30.5 mg, 81%, *dr* = >20:1) as a colorless oil.

**R<sub>f</sub>** = 0.3 (50% EtOAc/Hexanes).

Spectral data is reported for the major isomer.

**<sup>1</sup>H NMR** (400 MHz, CDCl<sub>3</sub>): δ 3.75 (ddd, *J* = 11.3, 6.7, 4.9 Hz, 1H), 3.62 (ddd, *J* = 10.7, 7.0, 5.0 Hz, 1H), 3.44 – 3.35 (m, 1H), 2.73 (s, 2H), 1.75 – 1.17 (m, 14H), 0.93 (d, *J* = 6.7 Hz, 3H), 0.90 – 0.85 (m, 3H).

**<sup>13</sup>C NMR** (100 MHz, CDCl<sub>3</sub>): δ 76.03, 60.54, 36.53, 35.36, 34.59, 32.00, 29.55, 25.97, 22.78, 16.73, 14.23.

**LRMS** (CI) Calcd. for C<sub>11</sub>H<sub>24</sub>NaO<sub>2</sub> [M+Na]<sup>+</sup>: 211, Found: 211.

**FTIR** (neat): 2970, 2928, 1739, 1456, 1366, 1229, 1217 cm<sup>-1</sup>.

**HPLC** (Chiralcel OD-H column, hexanes:*i*-PrOH = 95:5, 1 mL/min, 230 nm), ee = 90%.

**[α]<sub>D</sub><sup>25</sup>** = -2.1 (c = 0.62, CHCl<sub>3</sub>)

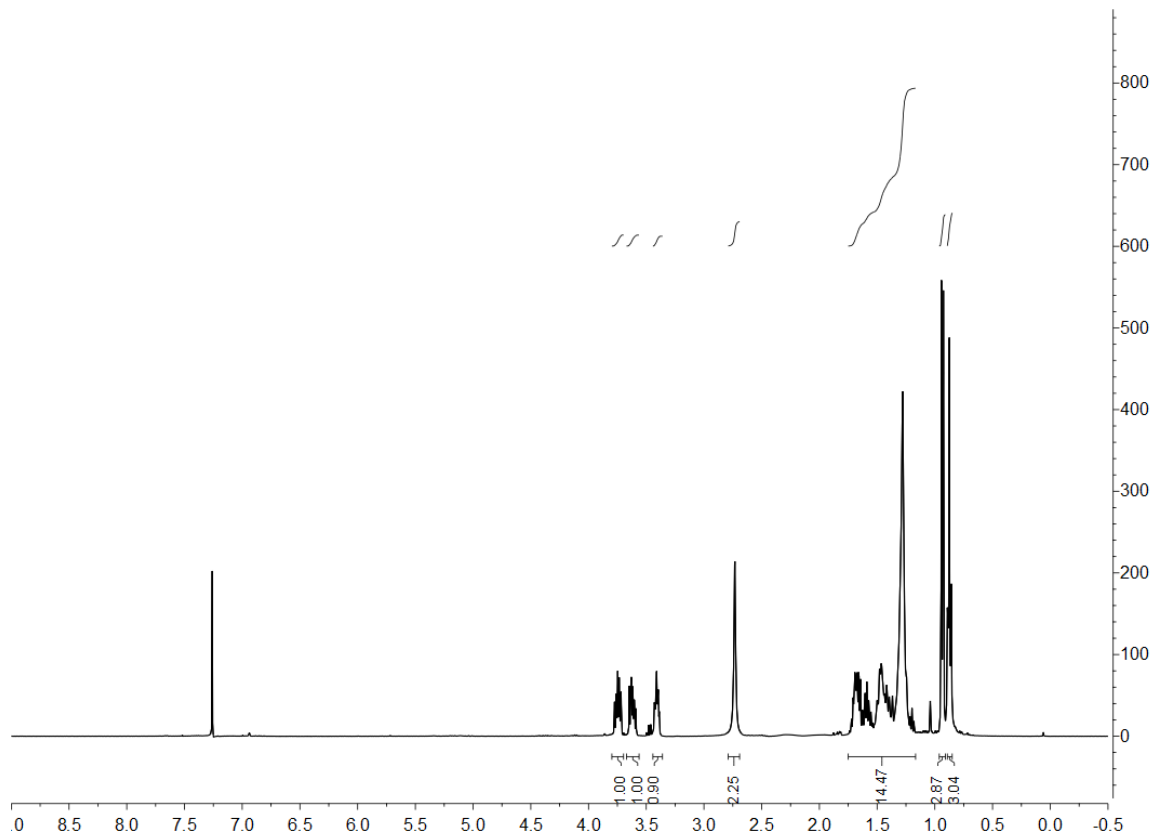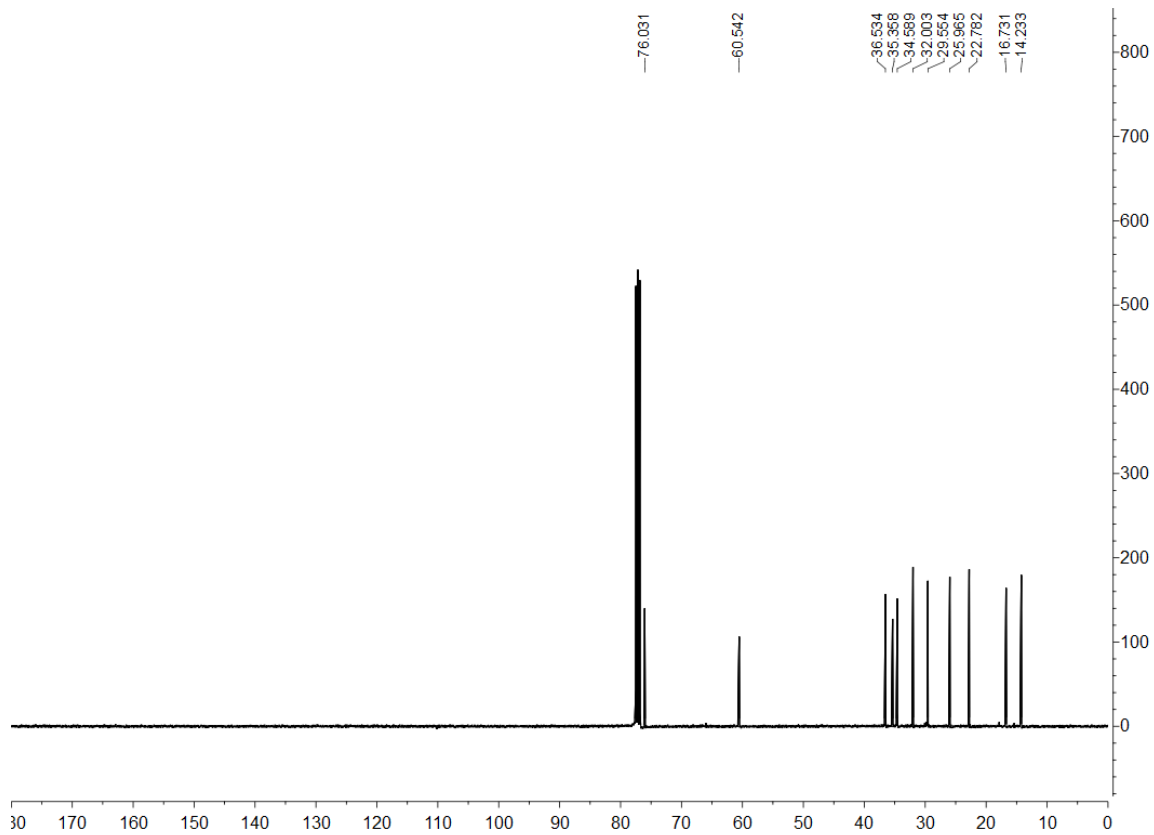

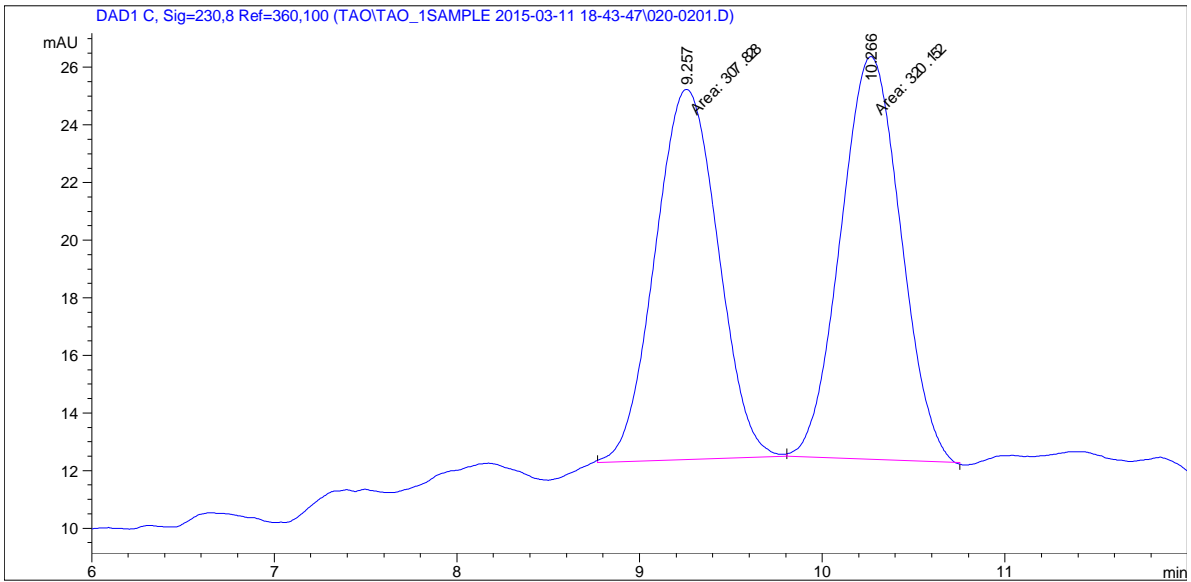

| Peak # | RetTime [min] | Type | Width [min] | Area [mAU*s] | Height [mAU] | Area %  |
|--------|---------------|------|-------------|--------------|--------------|---------|
| 1      | 9.257         | MM   | 0.3991      | 307.82849    | 12.85460     | 49.0188 |
| 2      | 10.266        | MM   | 0.3816      | 320.15195    | 13.98154     | 50.9812 |

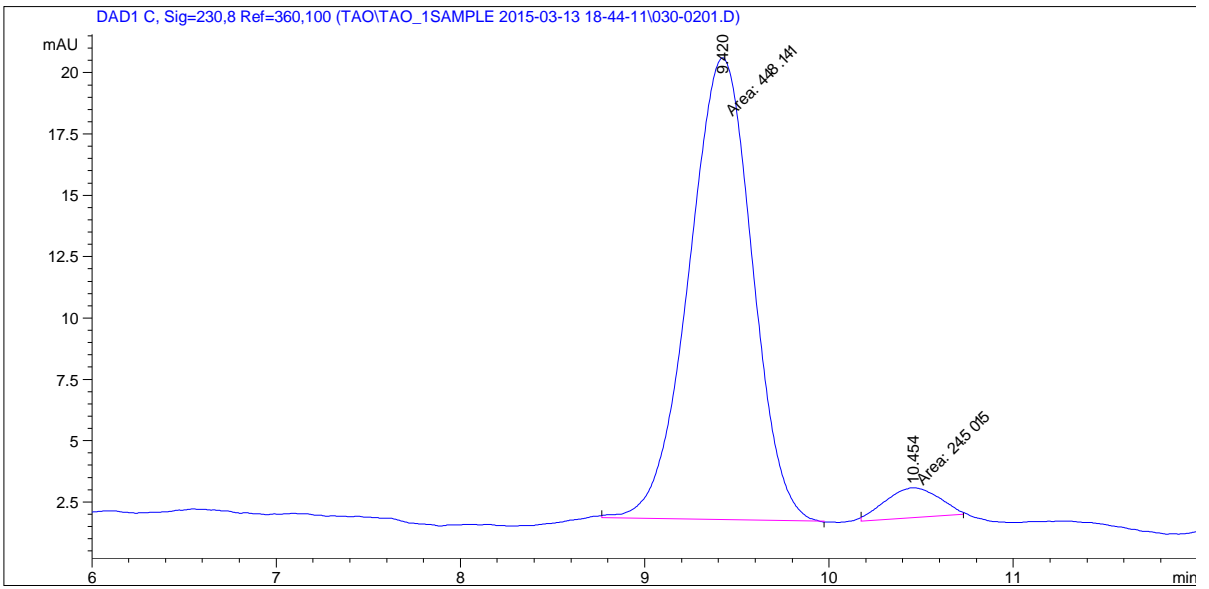

| Peak # | RetTime [min] | Type | Width [min] | Area [mAU*s] | Height [mAU] | Area %  |
|--------|---------------|------|-------------|--------------|--------------|---------|
| 1      | 9.420         | MM   | 0.3969      | 448.14063    | 18.81815     | 94.8160 |
| 2      | 10.454        | MM   | 0.3367      | 24.50155     | 1.21290      | 5.1840  |

**(3*S*,4*R*)-7,7,7-trifluoro-3-methylheptane-1,4-diol (5o).**

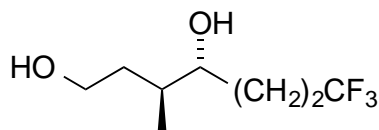

The residue was subjected to flash column chromatography for purification to furnish the title compound (26.8 mg, 67%, *dr* = >20:1) as a colorless oil.

**R<sub>f</sub>** = 0.3 (50% EtOAc/Hexanes).

Spectral data is reported for the major isomer.

**<sup>1</sup>H NMR** (400 MHz, CDCl<sub>3</sub>): δ 3.86 – 3.75 (m, 1H), 3.73 – 3.63 (m, 1H), 3.43 (ddd, *J* = 9.3, 6.1, 3.0 Hz, 1H), 2.54 (s, 2H), 2.47 – 2.27 (m, 1H), 2.25 – 2.03 (m, 1H), 1.84 – 1.55 (m, 5H), 0.97 (d, *J* = 6.7 Hz, 3H).

**<sup>13</sup>C NMR** (100 MHz, CDCl<sub>3</sub>): δ 74.47, 60.40, 37.10, 35.29, 31.12, 30.83, 30.55, 30.26, 27.02, 26.99, 16.60.

**<sup>19</sup>F NMR** (378 MHz, CDCl<sub>3</sub>): δ 66.34.

**LRMS** (CI) Calcd. for C<sub>8</sub>H<sub>15</sub>NaF<sub>3</sub>O<sub>2</sub> [M+Na]<sup>+</sup>: 223, Found: 223.

**FTIR** (neat): 2970, 1739, 1366, 1252, 1229, 1217, 1138, 1031 cm<sup>-1</sup>.

**GC** (cyclosil-B: Initial temperature: 110 °C, rate: 1 °C /min, End temperature: 150 °C), ee = 90%.

**[α]<sub>D</sub><sup>25</sup>** = -4.7 (c = 0.63, CHCl<sub>3</sub>)

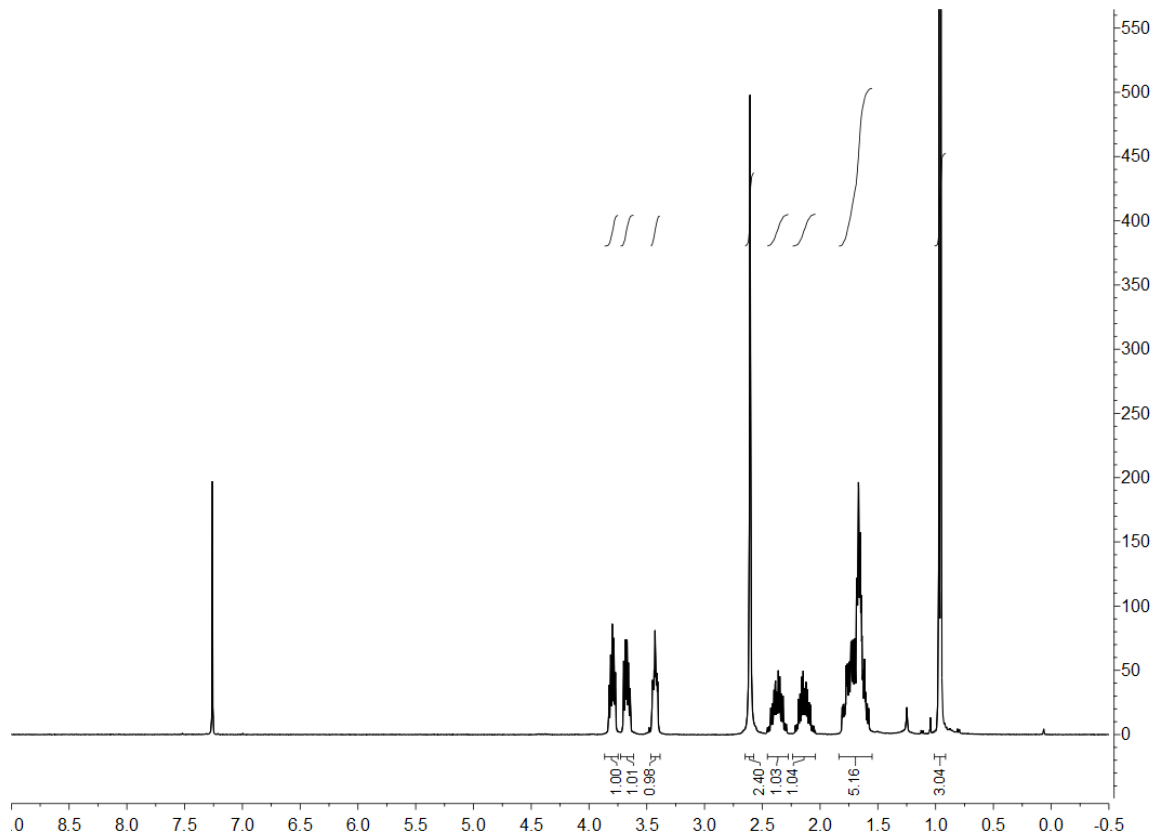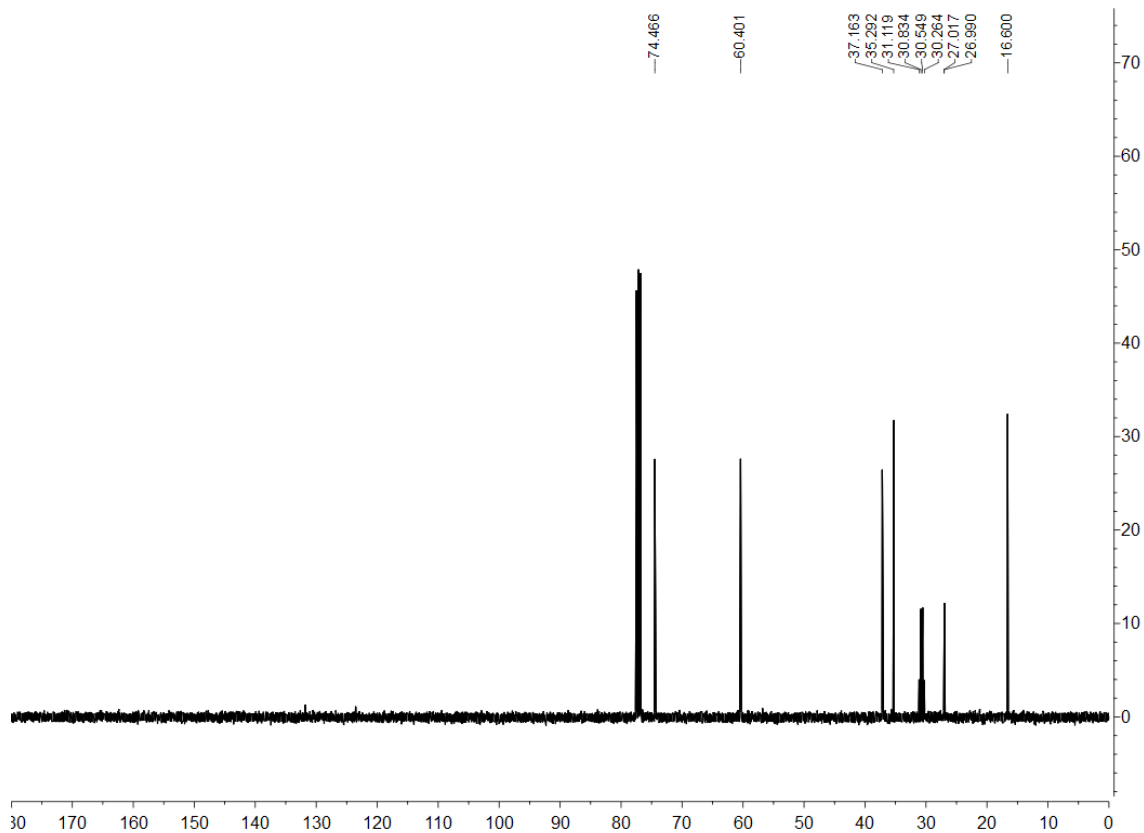

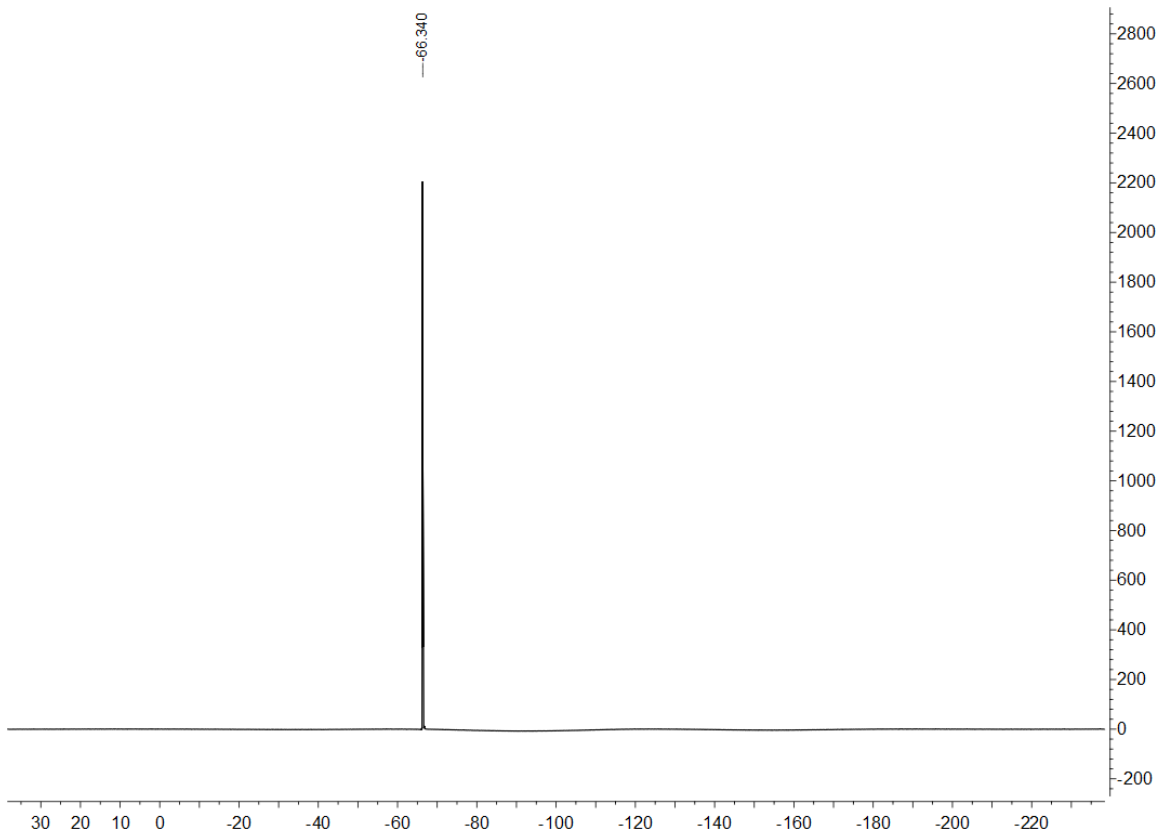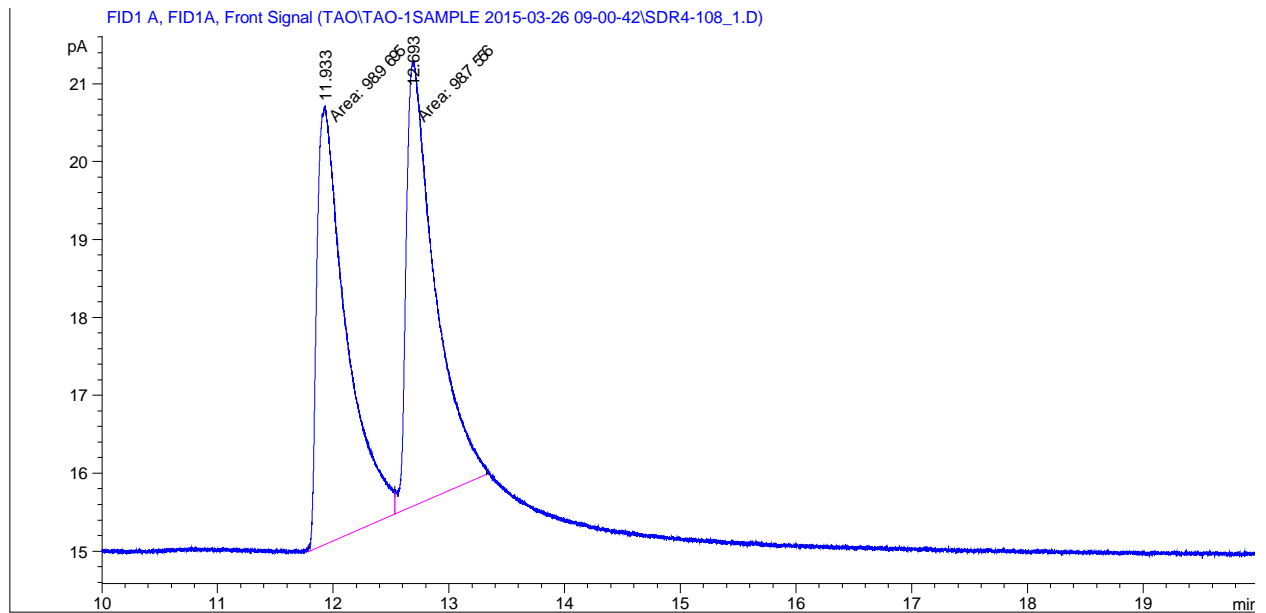

| Peak # | RetTime [min] | Type | Width [min] | Area [pA*s] | Height [pA] | Area %   |
|--------|---------------|------|-------------|-------------|-------------|----------|
| 1      | 11.933        | MF   | 0.2926      | 98.96948    | 5.63673     | 50.05408 |
| 2      | 12.693        | FM   | 0.2884      | 98.75562    | 5.70641     | 49.94592 |



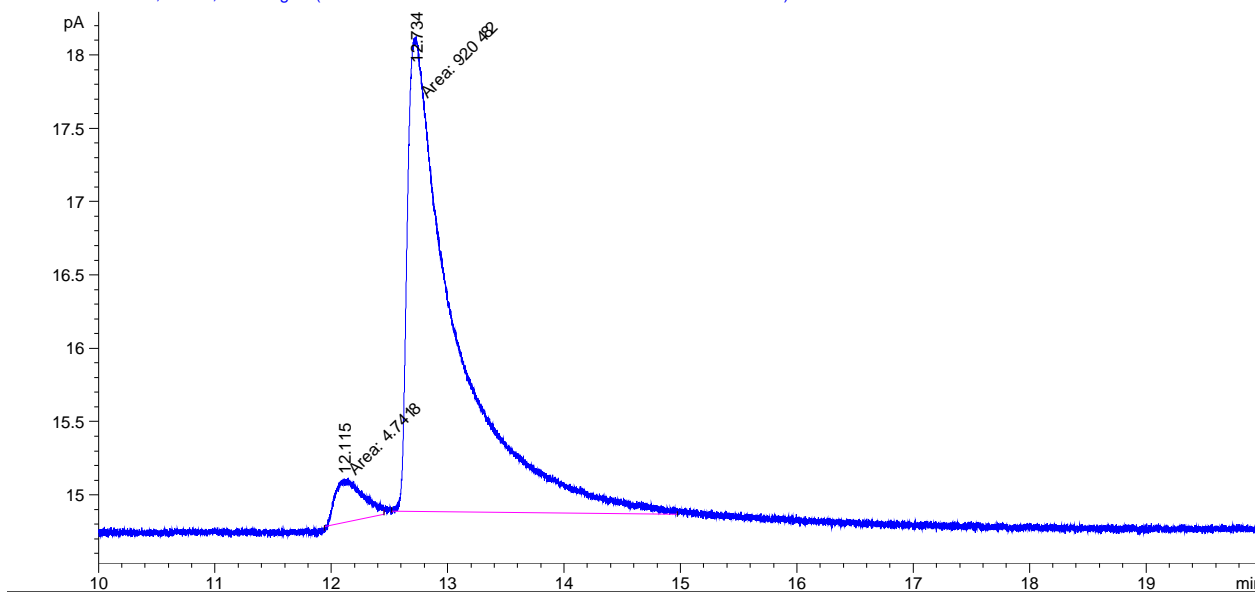

| Peak # | RetTime [min] | Type | Width [min] | Area [pA*s] | Height [pA] | Area %   |
|--------|---------------|------|-------------|-------------|-------------|----------|
| 1      | 12.115        | MM   | 0.2619      | 4.74180     | 3.01749e-1  | 4.89906  |
| 2      | 12.734        | MM   | 0.4743      | 92.04816    | 3.23429     | 95.10094 |

**(1*S*,2*S*)-1-(4-bromophenyl)-2-ethylbutane-1,4-diol (5p).**

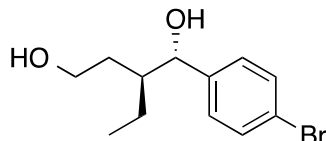

The residue was subjected to flash column chromatography for purification to furnish the title compound (34.3 mg, 63%, *dr* = >20:1) as a white solid.

**R<sub>f</sub>** = 0.3 (50% EtOAc/Hexanes).

Spectral data is reported for the major isomer.

**<sup>1</sup>H NMR** (400 MHz, CDCl<sub>3</sub>): δ 7.46 (d, *J* = 8.4 Hz, 2H), 7.20 (d, *J* = 8.1 Hz, 2H), 4.54 (d, *J* = 6.5 Hz, 1H), 3.74 (ddd, *J* = 10.6, 6.8, 4.7 Hz, 1H), 3.58 (ddd, *J* = 10.6, 6.8, 4.7 Hz, 1H), 3.35 (s, 1H), 1.78 – 1.60 (m, 3H), 1.40 – 1.14 (m, 3H), 0.88 (t, *J* = 7.4 Hz, 3H).

**<sup>13</sup>C NMR** (100 MHz, CDCl<sub>3</sub>): δ 143.08, 131.35, 128.20, 121.01, 76.00, 60.69, 45.26, 31.68, 23.66, 11.43.

**LRMS** (CI) Calcd. for C<sub>12</sub>H<sub>17</sub>BrNaO<sub>2</sub> [M+Na]<sup>+</sup>: 295, Found: 295.

**FTIR** (neat): 3299, 2886, 1070, 1057, 1008, 838, 686, 669 cm<sup>-1</sup>.

**HPLC** (Chiralcel OD-H column, hexanes:*i*-PrOH = 95:5, 1 mL/min, 230 nm), ee = 96%.

[α]<sub>D</sub><sup>25</sup> = -30.0 (c = 0.45, CHCl<sub>3</sub>)

**M.P.** 134.9-135.9 °C

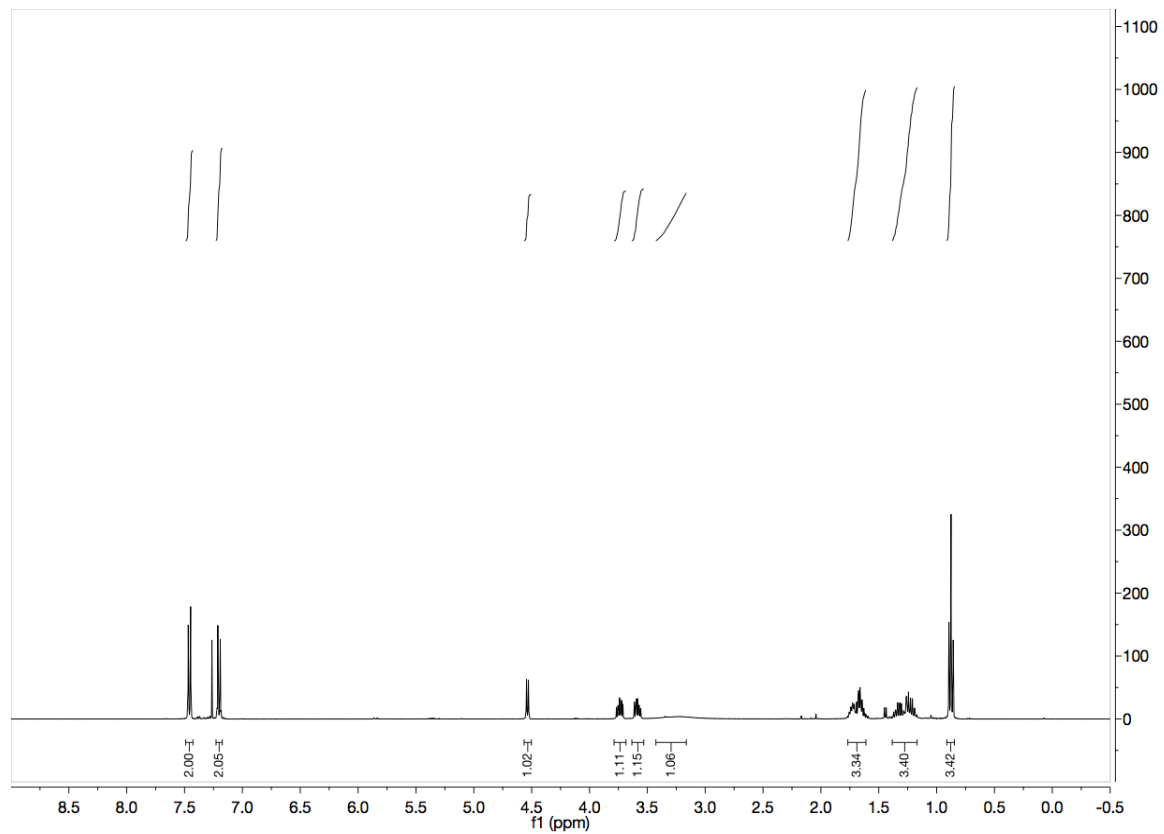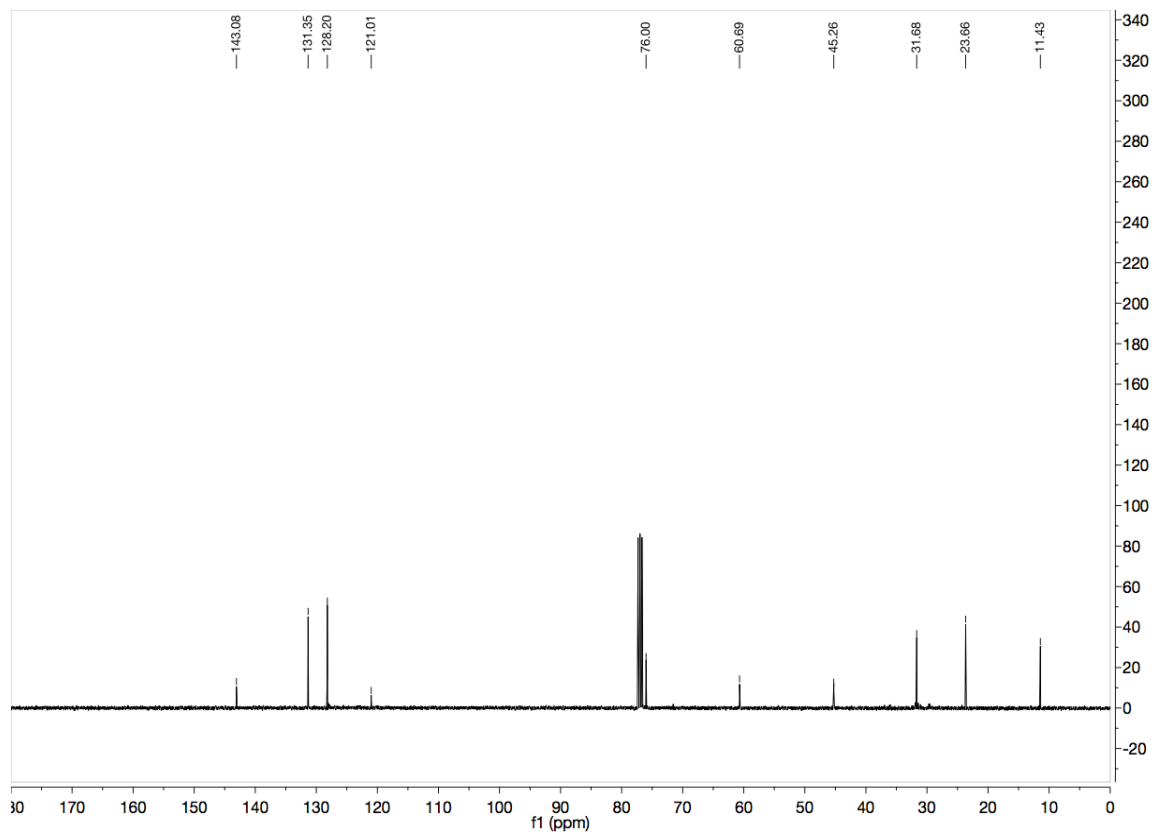

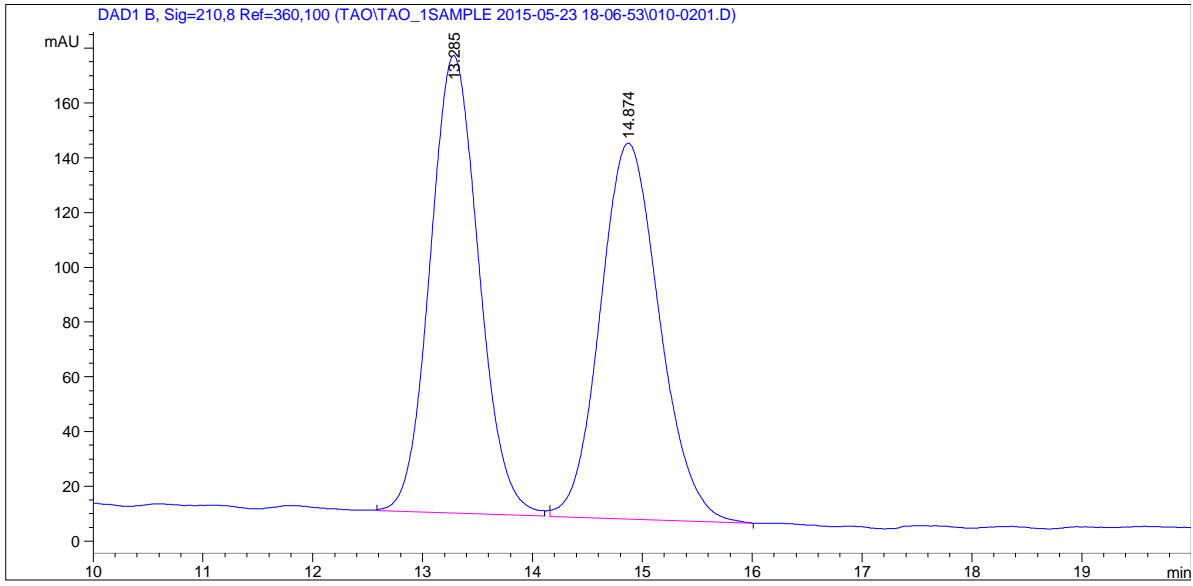

| Peak # | RetTime [min] | Type | Width [min] | Area [mAU*s] | Height [mAU] | Area %  |
|--------|---------------|------|-------------|--------------|--------------|---------|
| 1      | 13.285        | BB   | 0.4783      | 5161.87988   | 167.12447    | 50.0902 |
| 2      | 14.874        | BB   | 0.5751      | 5143.28369   | 137.27925    | 49.9098 |

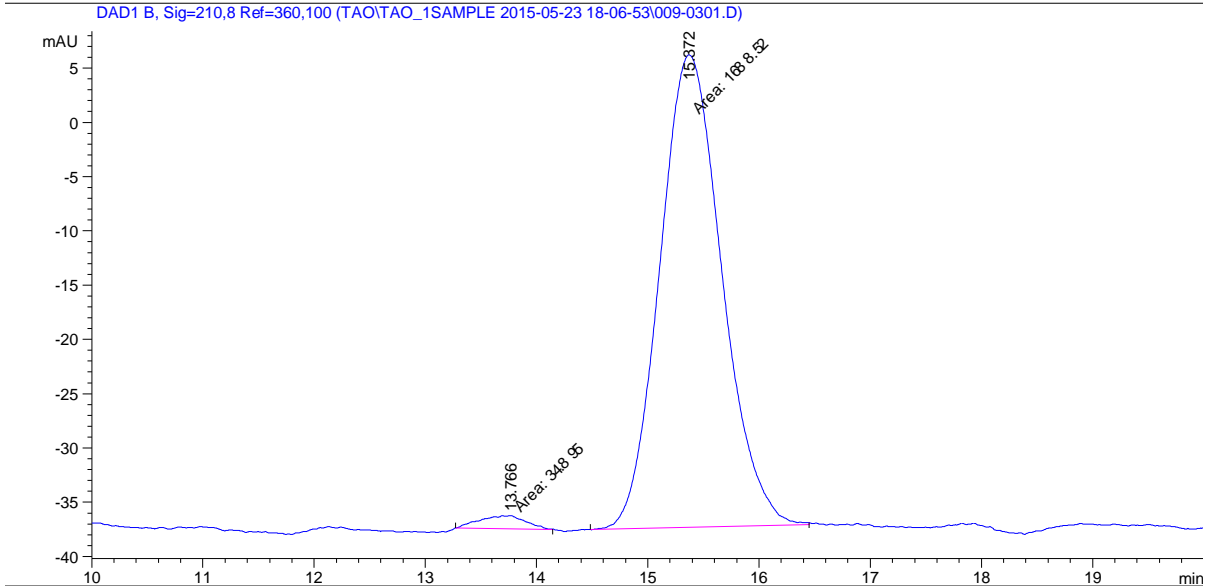

| Peak # | RetTime [min] | Type | Width [min] | Area [mAU*s] | Height [mAU] | Area %  |
|--------|---------------|------|-------------|--------------|--------------|---------|
| 1      | 13.766        | MM   | 0.4741      | 34.89495     | 1.22664      | 2.0248  |
| 2      | 15.372        | MM   | 0.6464      | 1688.51941   | 43.53523     | 97.9752 |

**(1*S*,2*R*)-1-(4-bromophenyl)-2-phenylbutane-1,4-diol (5q).**

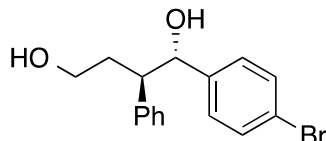

The residue was subjected to flash column chromatography for purification to furnish the title compound (41 mg, 64%, *dr* = >20:1).

**R<sub>f</sub>** = 0.3 (50% EtOAc/Hexanes).

Spectral data is reported for the major isomer.

**<sup>1</sup>H NMR** (400 MHz, Methanol-*d*<sub>4</sub>) δ 7.22 – 7.14 (m, 2H), 7.09 – 7.02 (m, 2H), 7.01 – 6.96 (m, 1H), 6.95 – 6.89 (m, 4H), 4.58 (d, *J* = 8.1 Hz, 1H), 3.30 (ddd, *J* = 10.6, 8.0, 4.5 Hz, 1H), 3.26 – 3.15 (m, 3H), 2.87 (ddd, *J* = 11.5, 8.1, 3.7 Hz, 1H), 2.33 – 2.17 (m, 1H), 1.93 – 1.75 (m, 1H).

**<sup>13</sup>C NMR** (100 MHz, Methanol-*d*<sub>4</sub>): δ 144.57, 142.79, 131.71, 129.89, 129.84, 129.12, 127.39, 121.47, 78.79, 61.27, 51.78, 35.43.

**LRMS** (CI) Calcd. for C<sub>16</sub>H<sub>17</sub>BrNaO<sub>2</sub> [M+Na]<sup>+</sup>: 343, Found: 343.

**FTIR** (neat): 2362, 1486, 1070, 1037, 1008, 818, 756, 700 cm<sup>-1</sup>.

**HPLC** (Chiralcel OD-H column, hexanes:*i*-PrOH = 95:5, 1 mL/min, 210 nm), ee = 90%.

[α]<sub>D</sub><sup>25</sup> = -1.3 (c = 1.0, Methanol)

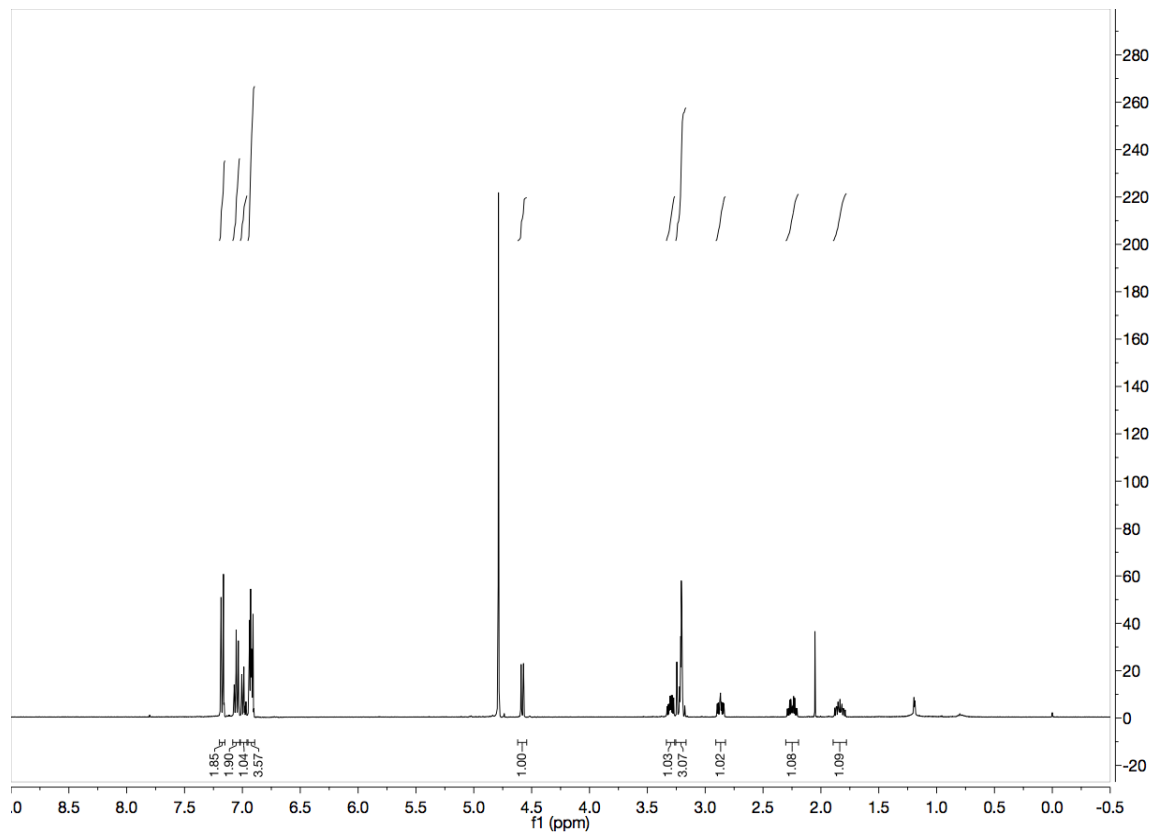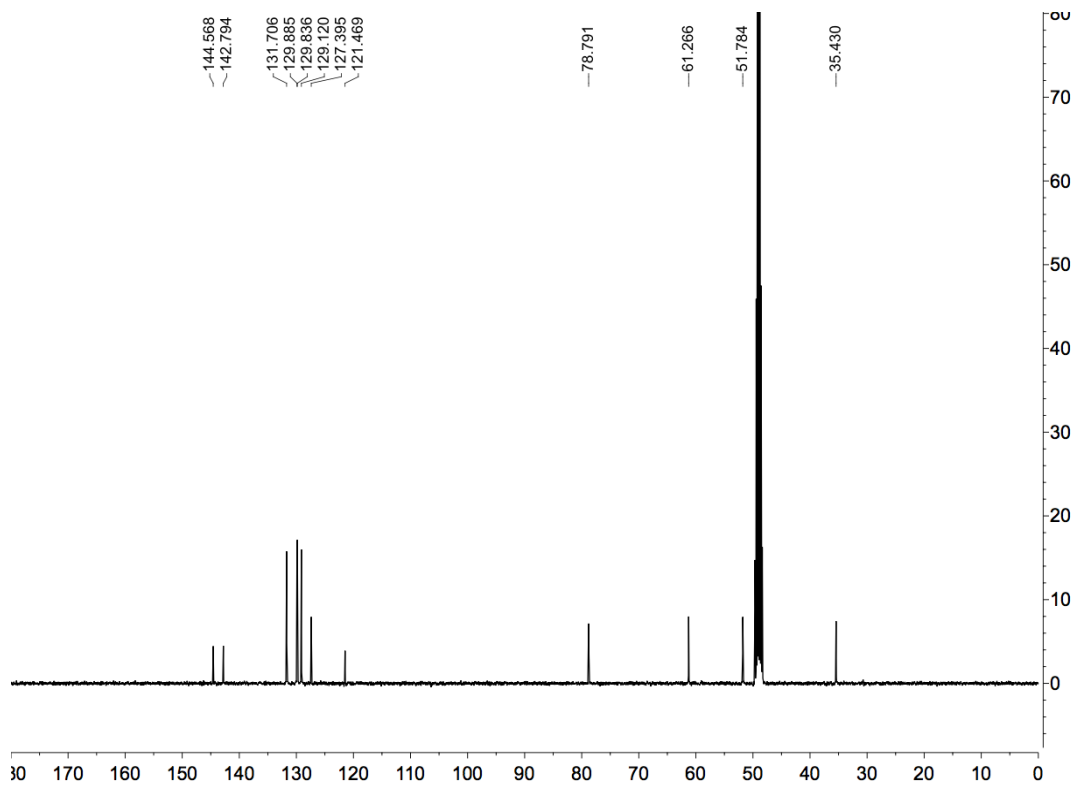

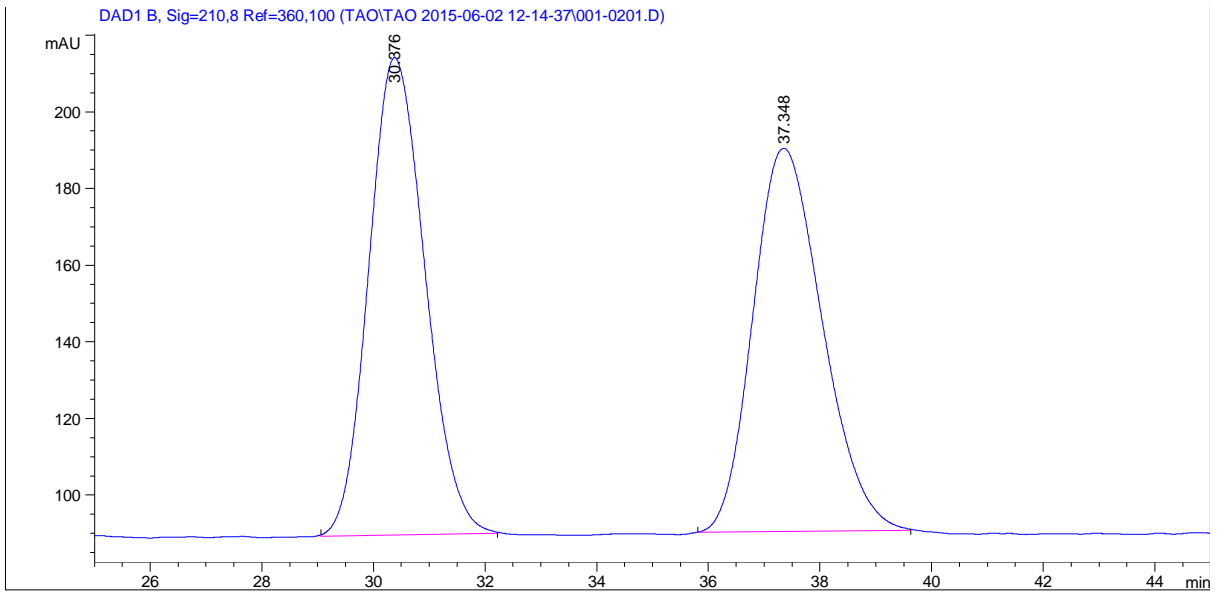

| Peak # | RetTime [min] | Type | Width [min] | Area [mAU*s] | Height [mAU] | Area %  |
|--------|---------------|------|-------------|--------------|--------------|---------|
| 1      | 30.376        | BB   | 1.0911      | 8726.72266   | 124.59850    | 50.2329 |
| 2      | 37.348        | BB   | 1.3323      | 8645.80469   | 100.04136    | 49.7671 |

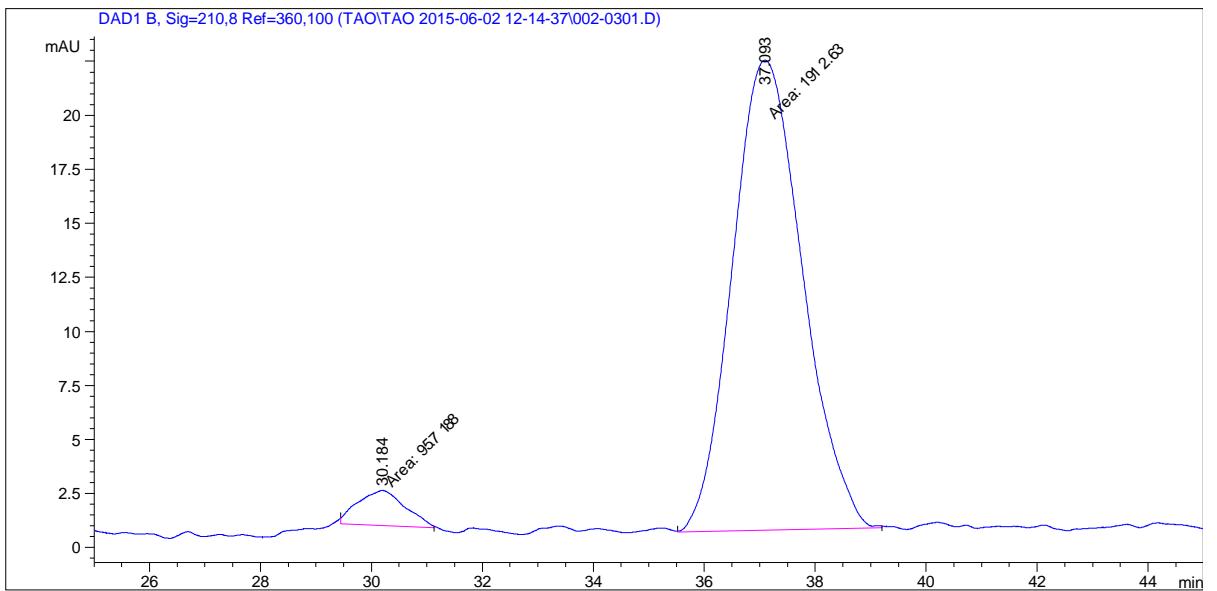

| Peak # | RetTime [min] | Type | Width [min] | Area [mAU*s] | Height [mAU] | Area %  |
|--------|---------------|------|-------------|--------------|--------------|---------|
| 1      | 30.184        | MM   | 0.9871      | 95.71881     | 1.61612      | 4.7660  |
| 2      | 37.093        | MM   | 1.4656      | 1912.62830   | 21.75019     | 95.2340 |

**C. General Procedure for Conversion of Alcohols 5a, 5c, 5e, 5f, 5k and 5m to *trans*-2,3-disubstituted furans 6a, 6c, 6e, 6f, 6k and 6m**

To a solution of alcohol in pyridine (0.4 M) at 0 °C was added TsCl (1.5 eq) in one portion. The mixture was stirred at 0 °C for 5 hours and was allowed to warm to room temperature overnight. Once TLC indicated no alcohol left, pyridine was removed by vacuo and the residue was subjected to flash column chromatography (Alumina, basic, 60-325 Mesh, eluent Hexanes:EA = 20:1) to afford the corresponding disubstituted furan products.



**(2*S*,3*S*)-3-methyl-2-phenyltetrahydrofuran (6a).**

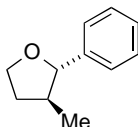

The residue was subjected to flash column chromatography for purification to furnish the title compound (81%, *dr* = >20:1) as a colorless liquid.

**$R_f$**  = 0.7 (20% EtOAc/Hexanes).

Spectral data is reported for the major isomer.

**$^1\text{H NMR}$**  (400 MHz,  $\text{CDCl}_3$ )  $\delta$  7.36 – 7.21 (m, 5H), 4.28 (d,  $J$  = 8.3 Hz, 1H), 4.10 (td,  $J$  = 8.3, 7.0 Hz, 1H), 4.03 (td,  $J$  = 8.4, 4.2 Hz, 1H), 2.27 – 2.15 (m, 1H), 2.15 – 1.99 (m, 1H), 1.71 (dq,  $J$  = 12.0, 8.5 Hz, 1H), 1.08 (d,  $J$  = 6.6 Hz, 3H).

**$^{13}\text{C NMR}$**  (100 MHz,  $\text{CDCl}_3$ ):  $\delta$  142.21, 128.27, 127.40, 126.08, 87.91, 67.90, 42.87, 34.95, 16.38.

**$\text{LRMS}$**  (CI) Calcd. for  $\text{C}_{11}\text{H}_{15}\text{O}$   $[\text{M}+\text{H}]^+$ : 163, Found: 163.

**$\text{FTIR}$**  (neat): 1453, 1097, 1044, 1026, 995, 926, 751, 699  $\text{cm}^{-1}$ .

**$\text{HPLC}$**  (Chiralcel OJ-H/OJ-H column, hexanes:*i*-PrOH = 99:1, 1 mL/min, 210 nm), ee = 91%.

$[\alpha]_D^{25}$  = -9.7 ( $c$  = 0.52,  $\text{CHCl}_3$ )

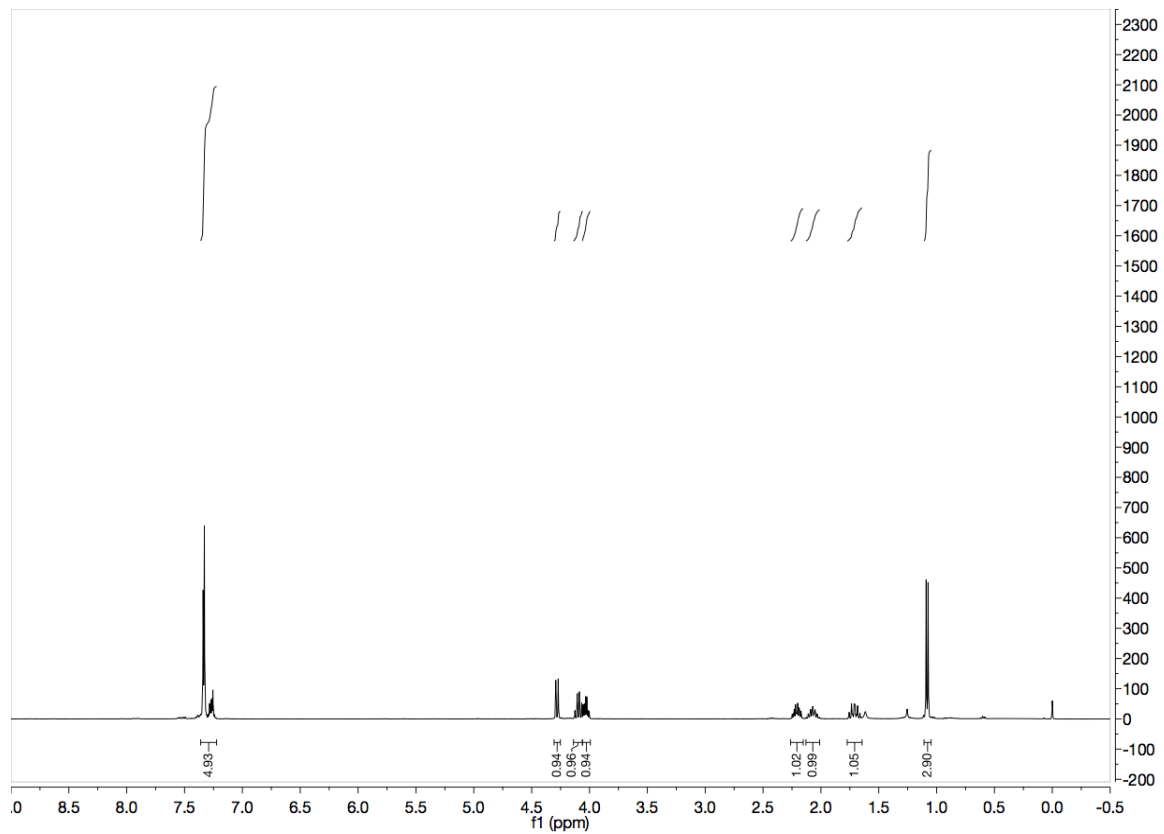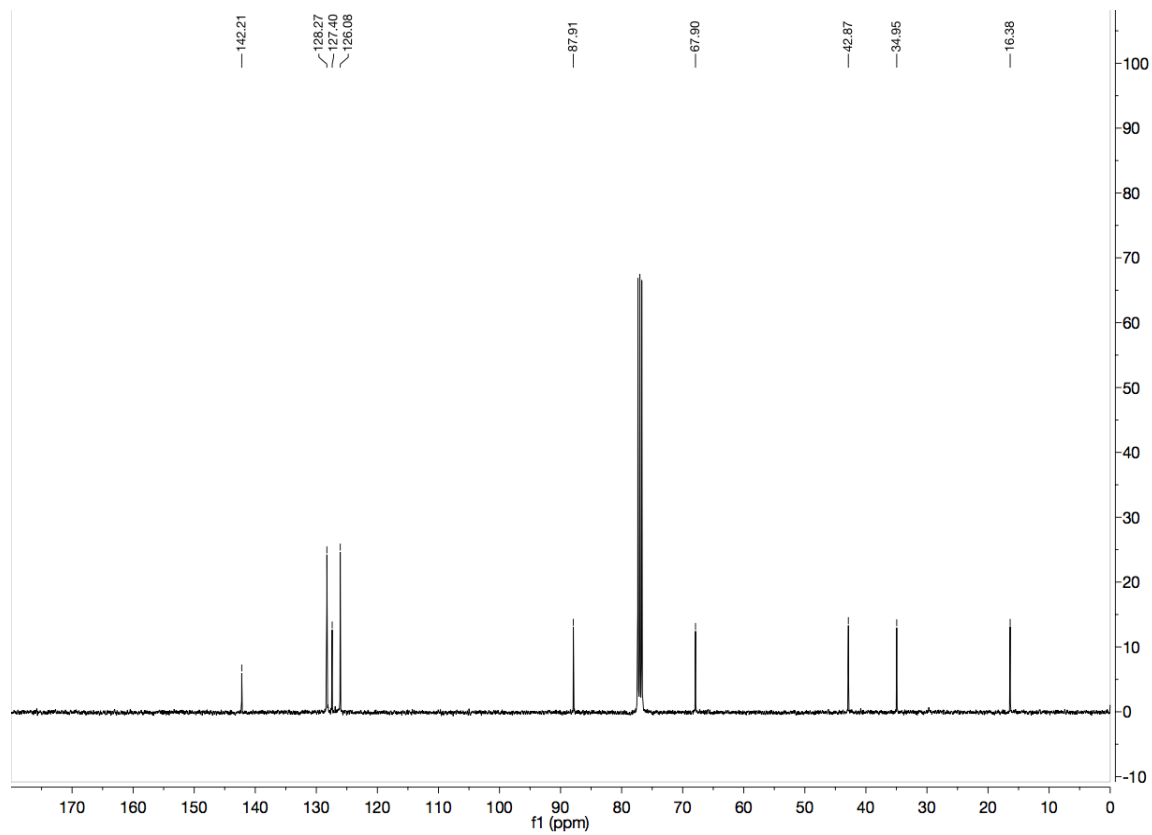

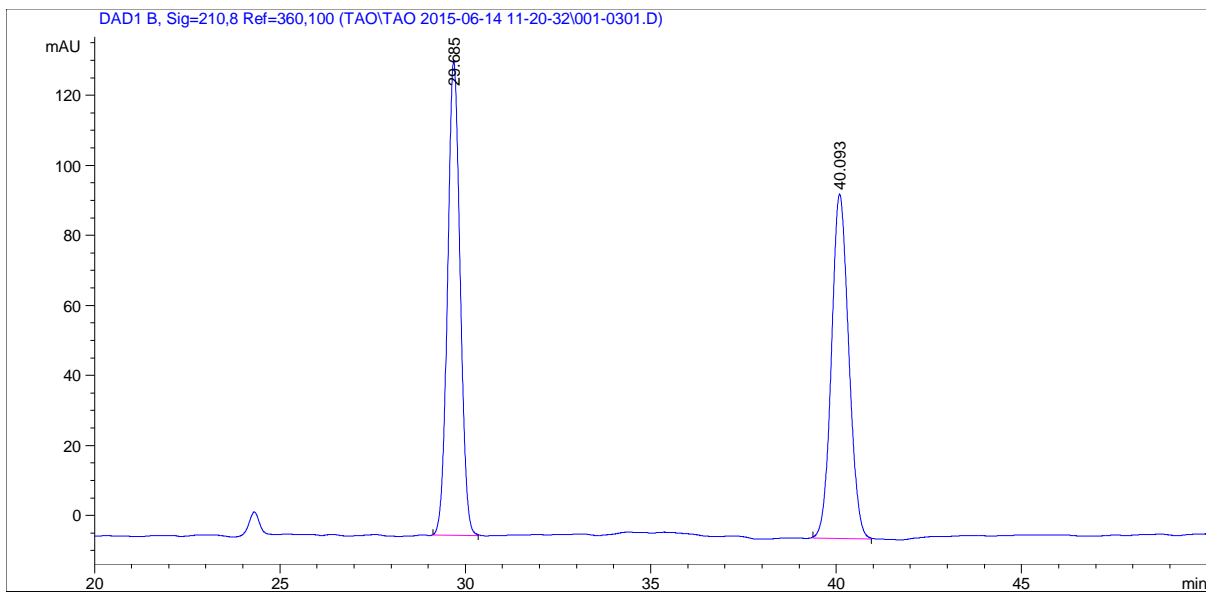

| Peak # | RetTime [min] | Type | Width [min] | Area [mAU*s] | Height [mAU] | Area %  |
|--------|---------------|------|-------------|--------------|--------------|---------|
| 1      | 29.685        | BB   | 0.3669      | 3197.04639   | 135.66116    | 50.0370 |
| 2      | 40.093        | BB   | 0.5027      | 3192.31348   | 98.35523     | 49.9630 |

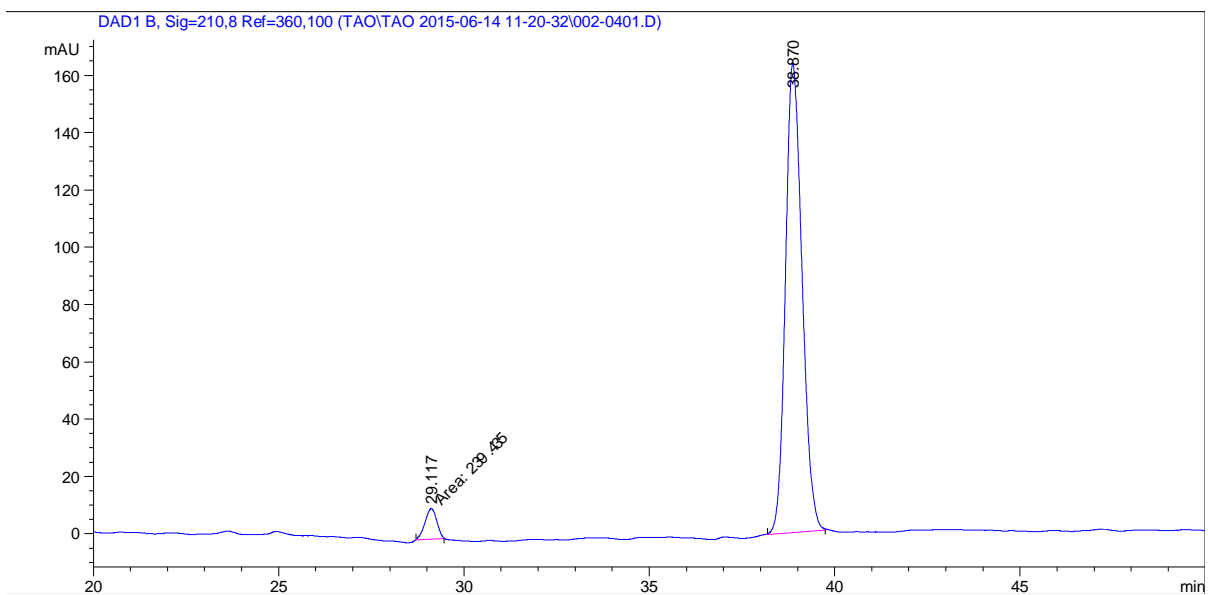

| Peak # | RetTime [min] | Type | Width [min] | Area [mAU*s] | Height [mAU] | Area %  |
|--------|---------------|------|-------------|--------------|--------------|---------|
| 1      | 29.117        | MM   | 0.3720      | 239.43546    | 10.72619     | 4.4972  |
| 2      | 38.870        | BB   | 0.4801      | 5084.62305   | 163.82202    | 95.5028 |

**(2*S*,3*S*)-2-(4-bromophenyl)-3-methyltetrahydrofuran (6c).**

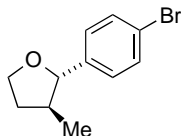

The residue was subjected to flash column chromatography for purification to furnish the title compound (78%, *dr* = >20:1) as a colorless liquid.

**R<sub>f</sub>** = 0.7 (20% EtOAc/Hexanes).

Spectral data is reported for the major isomer.

**<sup>1</sup>H NMR** (400 MHz, CDCl<sub>3</sub>) δ 7.49 – 7.44 (m, 2H), 7.23 – 7.19 (m, 2H), 4.24 (d, *J* = 8.2 Hz, 1H), 4.08 (td, *J* = 8.3, 7.0 Hz, 1H), 4.02 (td, *J* = 8.4, 4.3 Hz, 1H), 2.25 – 2.16 (m, 1H), 2.07 – 1.94 (m, 1H), 1.77 – 1.66 (m, 1H), 1.07 (d, *J* = 6.6 Hz, 3H).

**<sup>13</sup>C NMR** (100 MHz, CDCl<sub>3</sub>): δ 141.35, 131.36, 127.74, 121.11, 87.21, 67.92, 43.02, 34.85, 16.25.

**LRMS** (CI) Calcd. for C<sub>11</sub>H<sub>14</sub>BrO [M+H]<sup>+</sup>: 241, Found: 241.

**FTIR** (neat): 2960, 2871, 1486, 1069, 1046, 1010, 819, 800 cm<sup>-1</sup>.

**HPLC** (Chiralcel AD-H/AD-H column, hexanes:*i*-PrOH = 99:1, 0.5 mL/min, 210 nm), ee = 92%.

**[α]<sub>D</sub><sup>25</sup>** = -1.8 (c = 1.15, CHCl<sub>3</sub>)

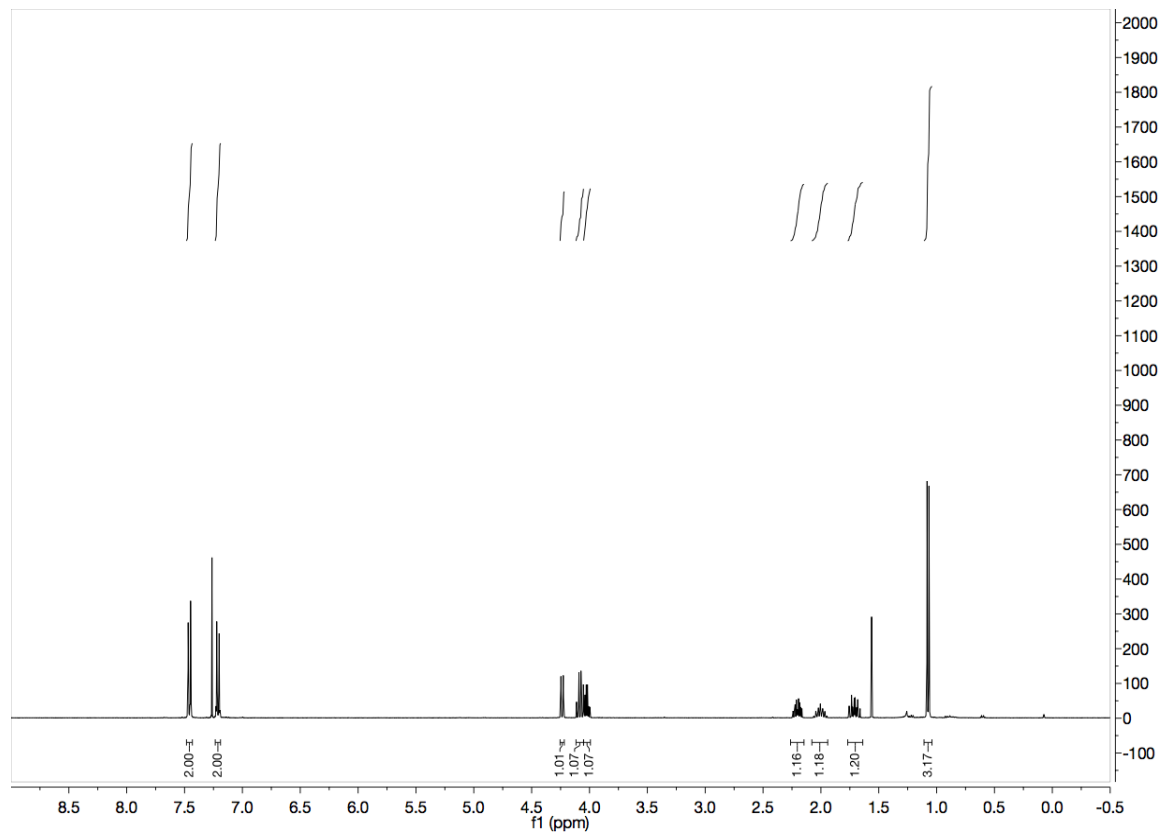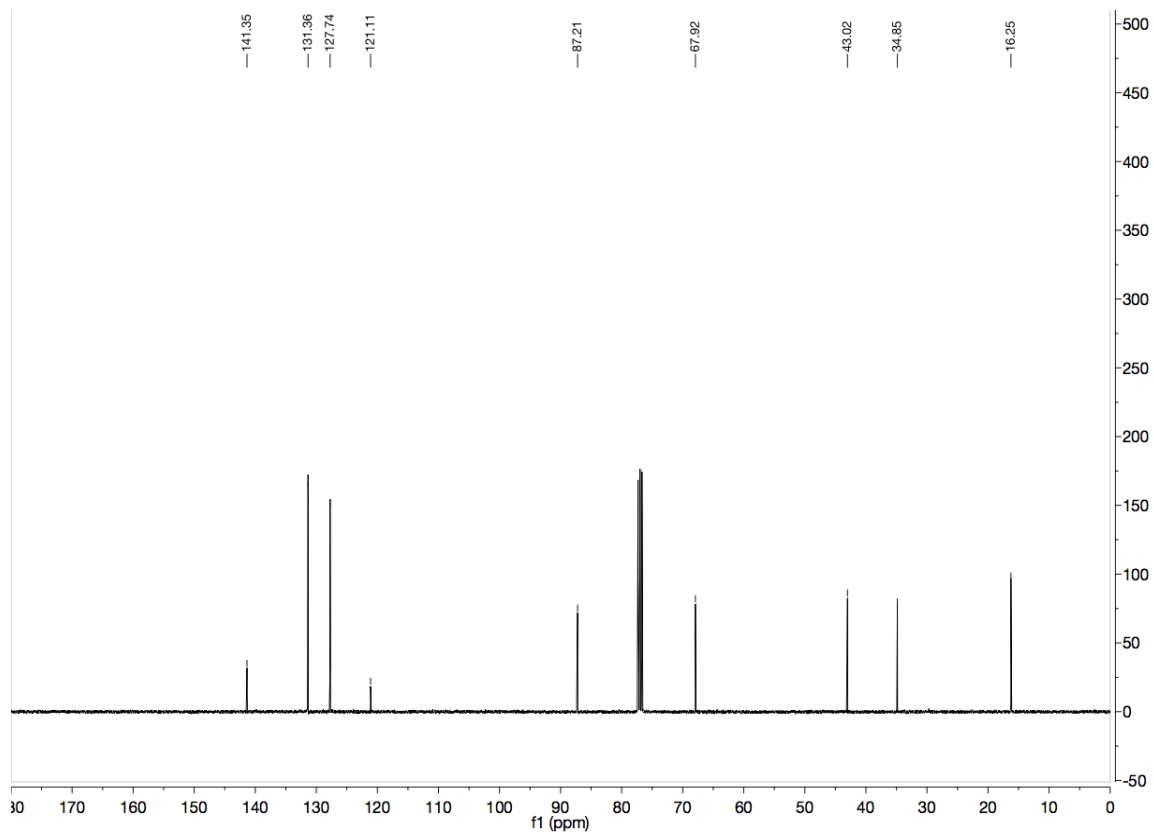

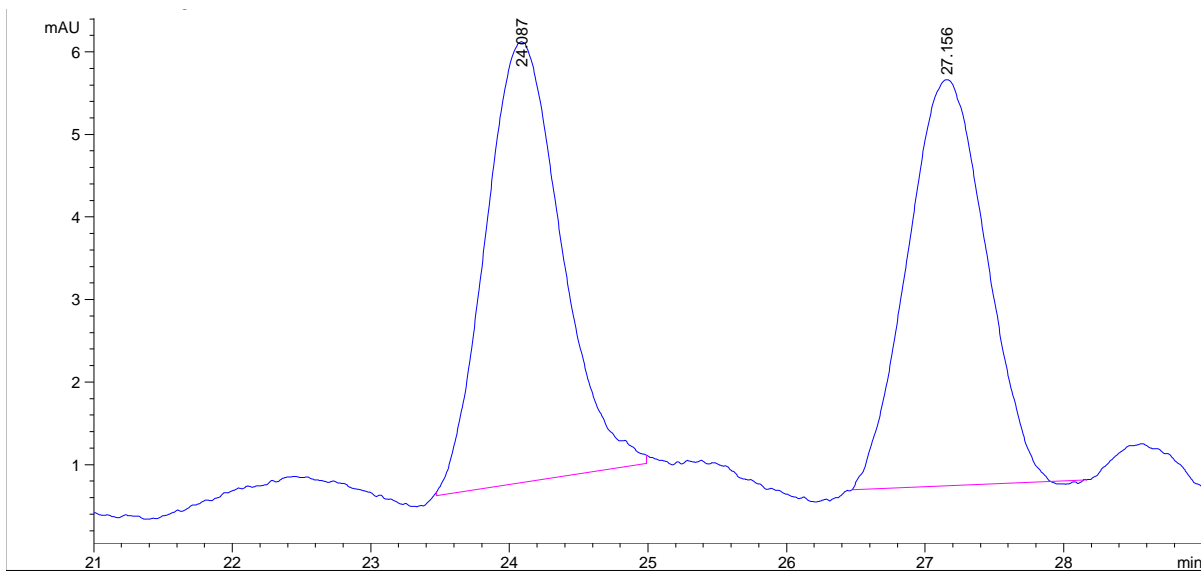

| Peak # | RetTime [min] | Type | Width [min] | Area [mAU*s] | Height [mAU] | Area %  |
|--------|---------------|------|-------------|--------------|--------------|---------|
| 1      | 24.081        | BB   | 0.5451      | 592.29285    | 15.95542     | 49.1568 |
| 2      | 27.161        | MM   | 0.6626      | 612.61224    | 15.40874     | 50.8432 |

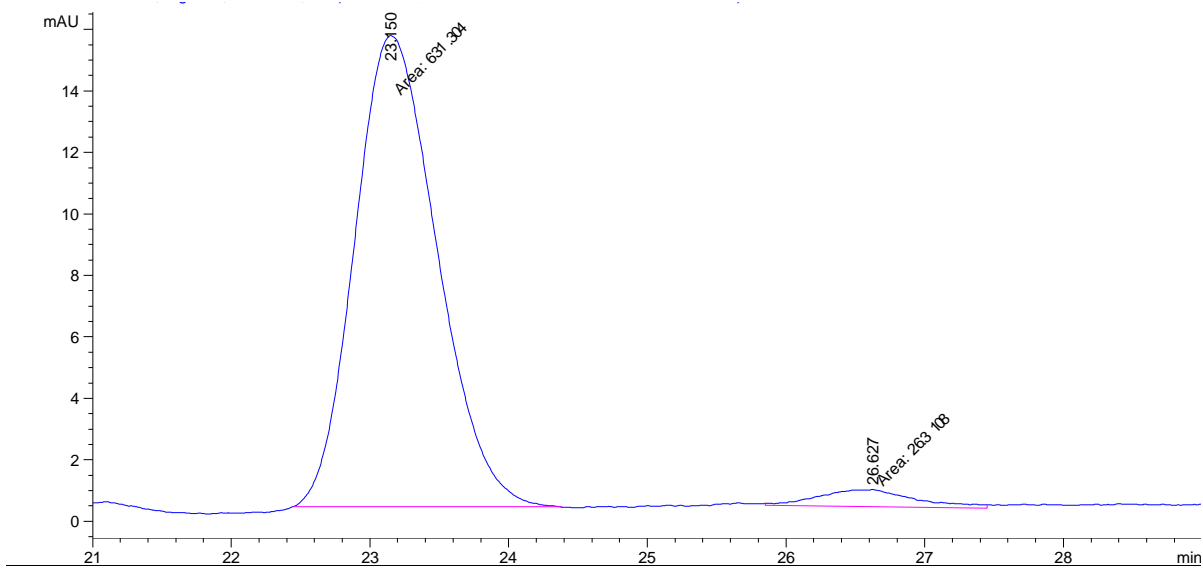

| Peak # | RetTime [min] | Type | Width [min] | Area [mAU*s] | Height [mAU] | Area %  |
|--------|---------------|------|-------------|--------------|--------------|---------|
| 1      | 23.150        | MM   | 0.6870      | 631.30402    | 15.31611     | 95.9991 |
| 2      | 26.627        | MM   | 0.7998      | 26.31081     | 5.48276e-1   | 4.0009  |

**(2*S*,3*S*)-2-(3-methoxyphenyl)-3-methyltetrahydrofuran (6e).**

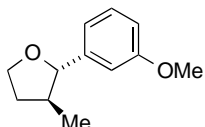

The residue was subjected to flash column chromatography for purification to furnish the title compound (80%, *dr* = >20:1) as a colorless liquid.

**$R_f$**  = 0.7 (20% EtOAc/Hexanes).

Spectral data is reported for the major isomer.

**$^1\text{H NMR}$**  (400 MHz,  $\text{CDCl}_3$ )  $\delta$  7.27 – 7.23 (m, 1H), 6.93 – 6.89 (m, 2H), 6.83 – 6.79 (m, 1H), 4.27 (d,  $J$  = 8.1 Hz, 1H), 4.09 (td,  $J$  = 8.2, 7.0 Hz, 1H), 4.03 (td,  $J$  = 8.4, 4.3 Hz, 1H), 3.82 (s, 3H), 2.25 – 2.15 (m, 1H), 2.13 – 2.01 (m, 1H), 1.76 – 1.64 (m, 1H), 1.10 (d,  $J$  = 6.6 Hz, 3H).

**$^{13}\text{C NMR}$**  (100 MHz,  $\text{CDCl}_3$ ):  $\delta$  159.66, 144.03, 129.24, 118.43, 112.85, 111.45, 87.75, 67.90, 55.19, 42.79, 34.91, 16.53.

**$\text{LRMS}$**  (ESI) Calcd. for  $\text{C}_{12}\text{H}_{17}\text{O}_2$   $[\text{M}+\text{H}]^+$ : 193, Found: 193.

**$\text{FTIR}$**  (neat): 1602, 1585, 1488, 1455, 1267, 1158, 1040, 782  $\text{cm}^{-1}$ .

**$\text{HPLC}$**  (Chiralcel OD-H column, hexanes:*i*-PrOH = 99:1, 1 mL/min, 210 nm), ee = 92%.

**$[\alpha]_D^{25}$**  = +1.9 ( $c$  = 0.52,  $\text{CHCl}_3$ )

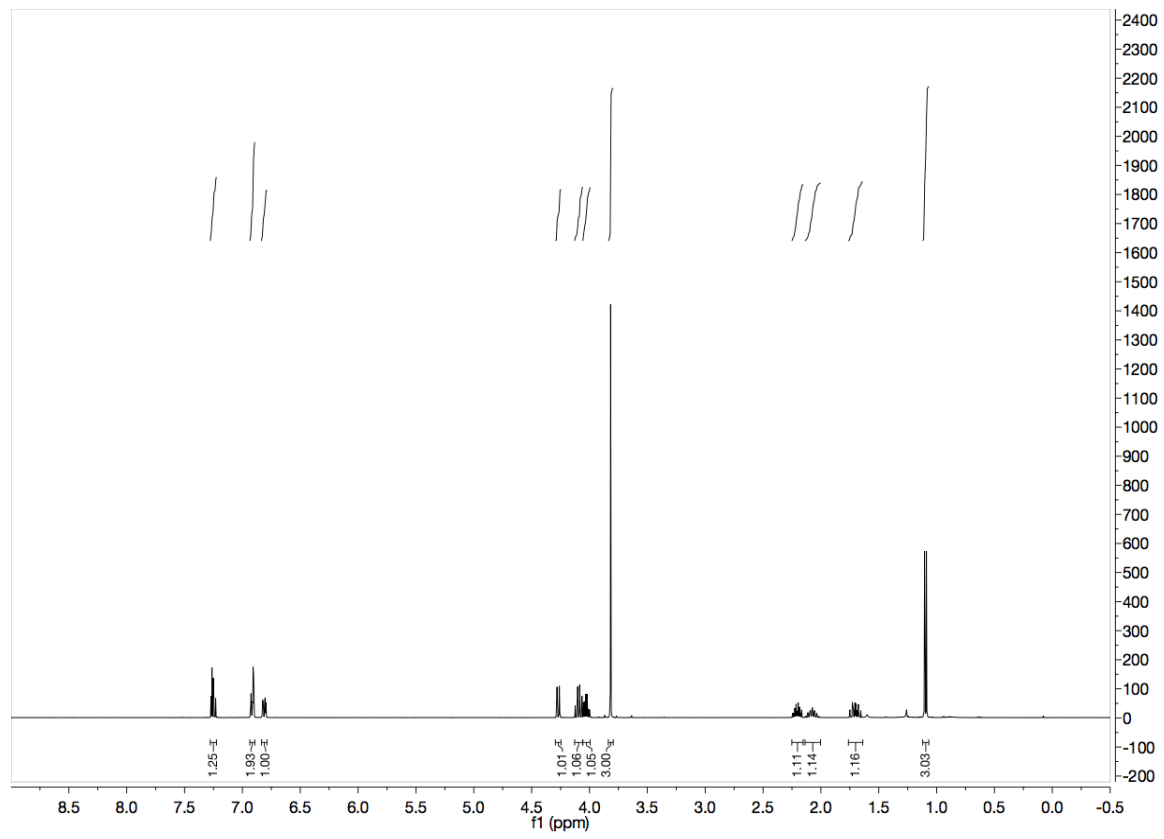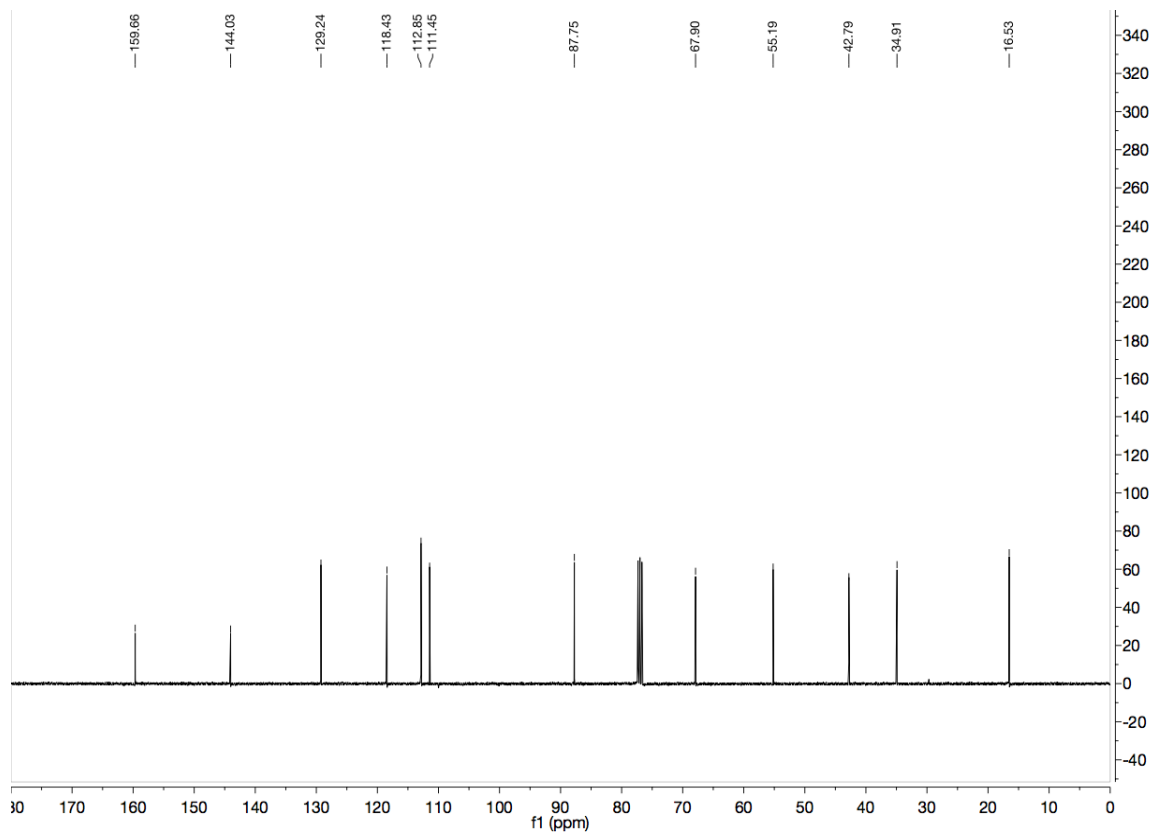



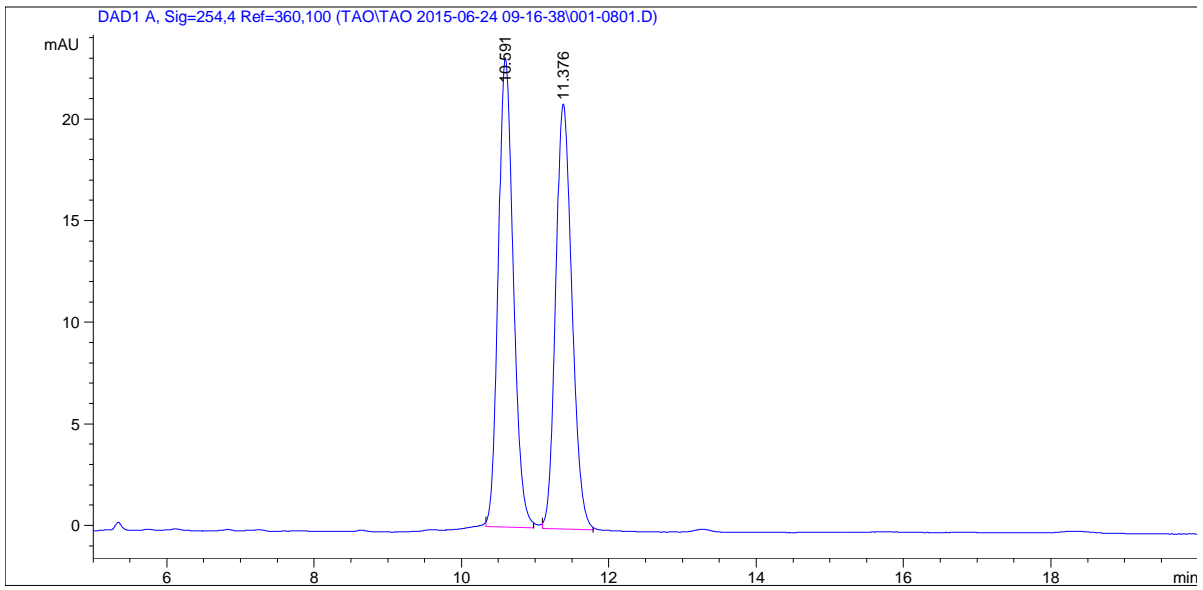

| Peak # | RetTime [min] | Type | Width [min] | Area [mAU*s] | Height [mAU] | Area %  |
|--------|---------------|------|-------------|--------------|--------------|---------|
| 1      | 10.591        | BB   | 0.2184      | 324.96088    | 23.06670     | 50.5531 |
| 2      | 11.376        | BB   | 0.2353      | 317.84952    | 20.91154     | 49.4469 |

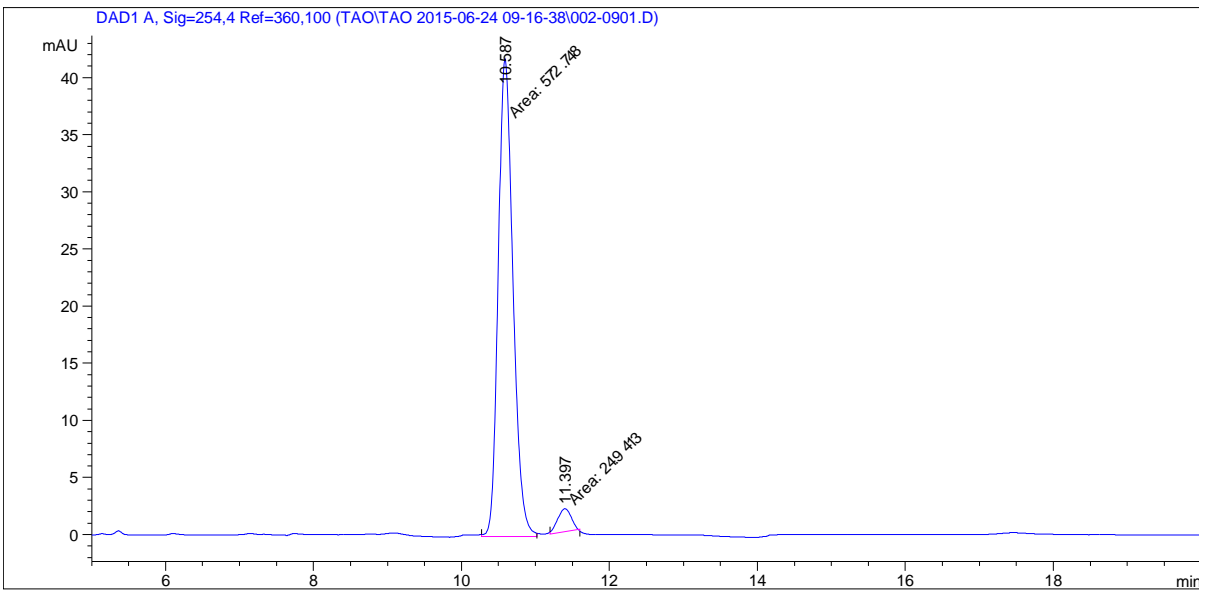

| Peak # | RetTime [min] | Type | Width [min] | Area [mAU*s] | Height [mAU] | Area %  |
|--------|---------------|------|-------------|--------------|--------------|---------|
| 1      | 10.587        | MM   | 0.2284      | 572.74780    | 41.79500     | 95.8270 |
| 2      | 11.397        | MM   | 0.2063      | 24.94130     | 2.01465      | 4.1730  |

**5-((2*S*,3*S*)-3-methyltetrahydrofuran-2-yl)benzo[*d*][1,3]dioxole (6f).**

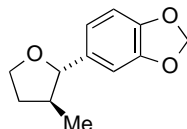

The residue was subjected to flash column chromatography for purification to furnish the title compound (82%, *dr* = >20:1) as a colorless liquid.

**$R_f$**  = 0.7 (20% EtOAc/Hexanes).

Spectral data is reported for the major isomer.

**$^1\text{H NMR}$**  (400 MHz,  $\text{CDCl}_3$ )  $\delta$  6.86 – 6.84 (m, 1H), 6.80 – 6.75 (m, 2H), 5.94 (s, 2H), 4.18 (d,  $J$  = 8.4 Hz, 1H), 4.06 (td,  $J$  = 8.3, 7.0 Hz, 1H), 3.99 (td,  $J$  = 8.4, 4.2 Hz, 1H), 2.25 – 2.15 (m, 1H), 2.08 – 1.94 (m, 1H), 1.75 – 1.62 (m, 1H), 1.05 (d,  $J$  = 6.6 Hz, 3H).

**$^{13}\text{C NMR}$**  (100 MHz,  $\text{CDCl}_3$ ):  $\delta$  147.70, 146.89, 136.04, 119.65, 107.91, 106.52, 100.89, 87.85, 67.73, 42.73, 34.87, 16.22.

**$\text{LRMS}$**  (ESI) Calcd. for  $\text{C}_{12}\text{H}_{15}\text{O}_3$   $[\text{M}+\text{H}]^+$ : 207, Found: 207.

**$\text{FTIR}$**  (neat): 1504, 1487, 1243, 1096, 1036, 934, 808, 784  $\text{cm}^{-1}$ .

**$\text{HPLC}$**  (Chiralcel AD-H column, hexanes:*i*-PrOH = 99:1, 1 mL/min, 254 nm), ee = 92%.

**$[\alpha]_D^{25}$**  = +5.2 ( $c$  = 0.58,  $\text{CHCl}_3$ )

PROTON\_01  
Tao-7-121

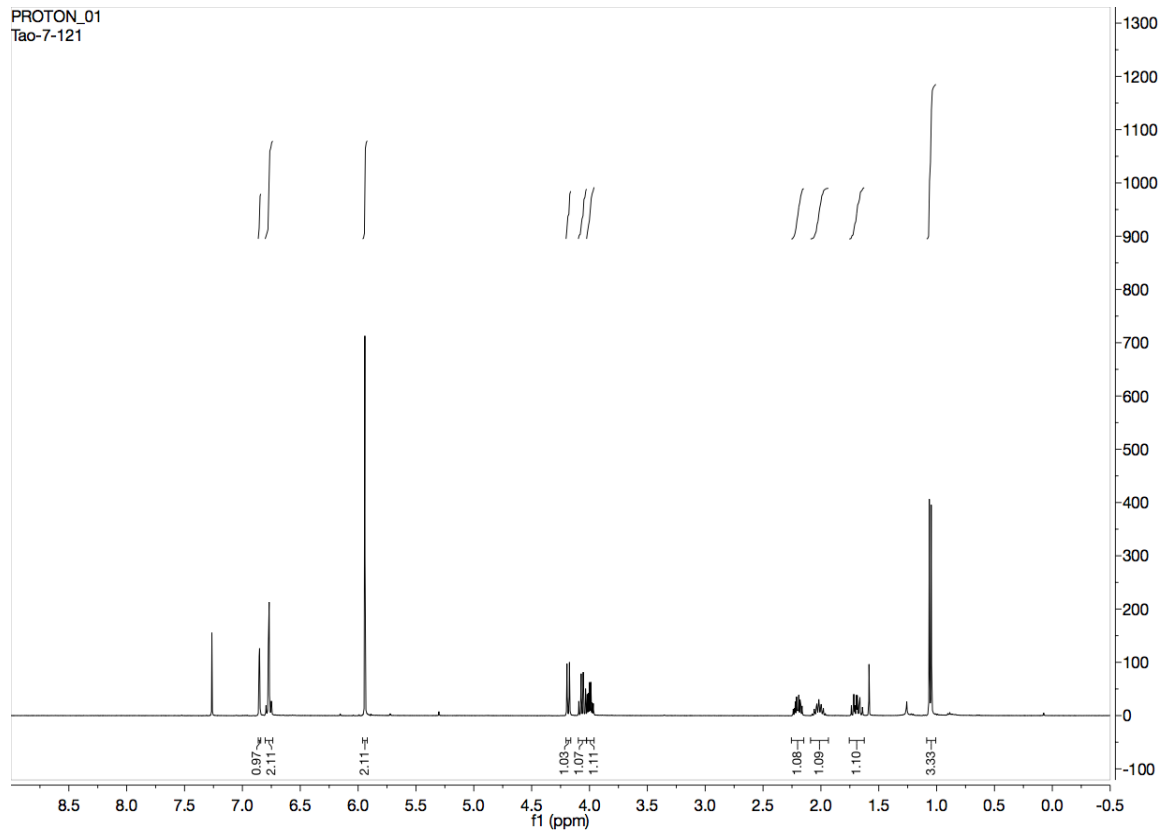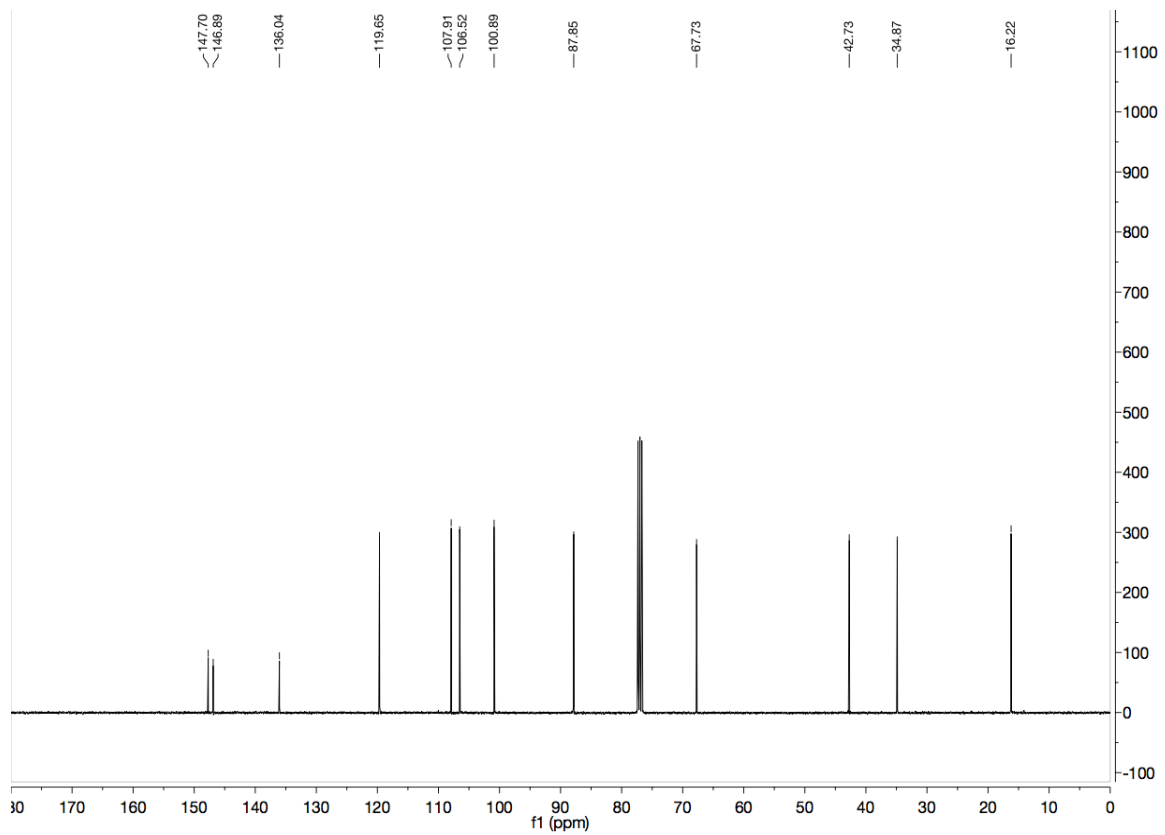

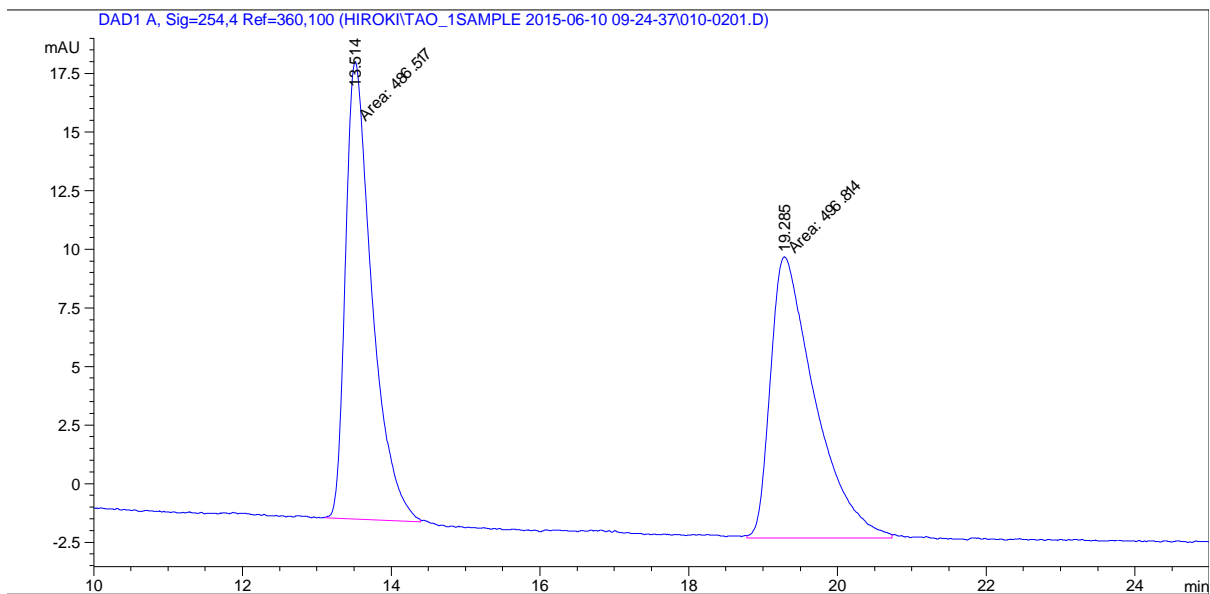

| Peak # | RetTime [min] | Type | Width [min] | Area [mAU*s] | Height [mAU] | Area %  |
|--------|---------------|------|-------------|--------------|--------------|---------|
| 1      | 13.514        | MM   | 0.4154      | 486.51660    | 19.51870     | 49.4764 |
| 2      | 19.285        | MM   | 0.6902      | 496.81357    | 11.99724     | 50.5236 |

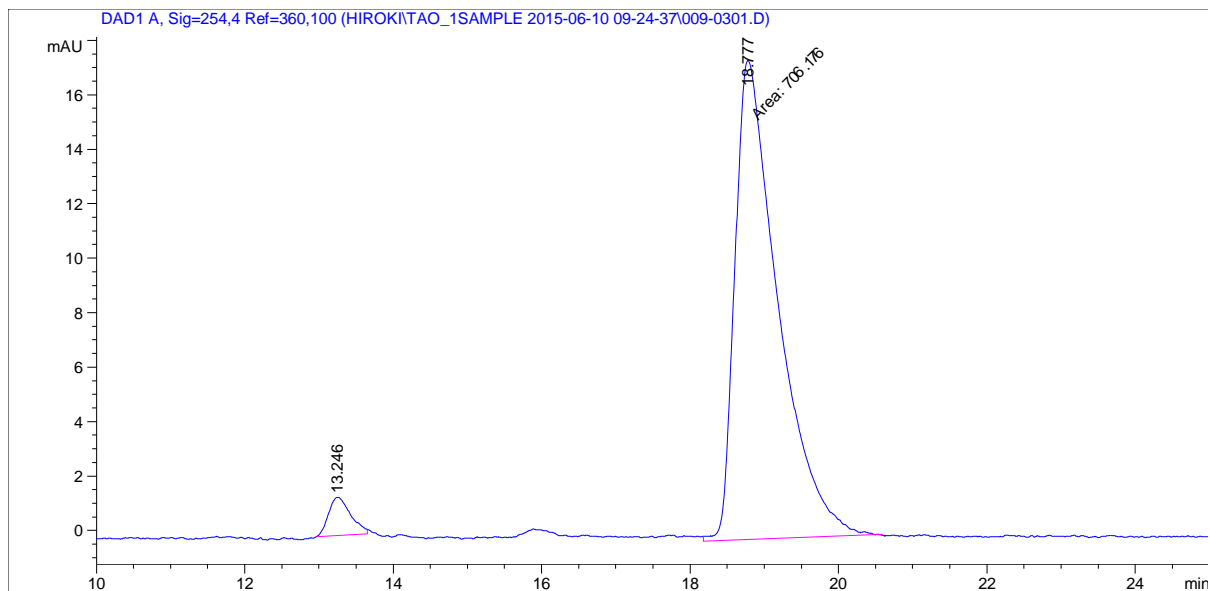

| Peak # | RetTime [min] | Type | Width [min] | Area [mAU*s] | Height [mAU] | Area %  |
|--------|---------------|------|-------------|--------------|--------------|---------|
| 1      | 13.246        | BB   | 0.2576      | 28.69911     | 1.39728      | 3.9053  |
| 2      | 18.777        | MM   | 0.6696      | 706.17615    | 17.57615     | 96.0947 |

**(2*S*,3*S*)-3-methyl-2-((*E*)-7-methylocta-2,6-dien-2-yl)tetrahydrofuran (6k).**

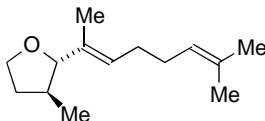

The residue was subjected to flash column chromatography for purification to furnish the title compound (77%, *dr* = >20:1) as a colorless liquid.

**R<sub>f</sub>** = 0.7 (20% EtOAc/Hexanes).

Spectral data is reported for the major isomer.

**<sup>1</sup>H NMR** (400 MHz, CDCl<sub>3</sub>) δ 5.15 (dq, *J* = 8.8, 1.3 Hz, 1H), 5.12 – 5.06 (m, 1H), 4.00 (t, *J* = 8.7 Hz, 1H), 3.93 – 3.81 (m, 2H), 2.16 – 2.07 (m, 3H), 2.07 – 2.00 (m, 2H), 1.91 – 1.77 (m, 1H), 1.70 (d, *J* = 1.4 Hz, 3H), 1.68 (d, *J* = 1.3 Hz, 3H), 1.62 – 1.53 (m, 4H), 0.99 (d, *J* = 6.6 Hz, 3H).

**<sup>13</sup>C NMR** (100 MHz, CDCl<sub>3</sub>): δ 140.32, 131.50, 124.60, 124.04, 82.24, 66.96, 40.71, 39.76, 34.78, 26.43, 25.65, 17.66, 16.75, 15.90.

**LRMS** (ESI) Calcd. for C<sub>14</sub>H<sub>25</sub>O [M+H]<sup>+</sup>: 209, Found: 209.

**FTIR** (neat): 2958, 2926, 2871, 1452, 1376, 1101, 1032, 987, 913 cm<sup>-1</sup>.

**HPLC** (Chiralcel AD-H/AD-H column, hexanes:*i*-PrOH = 99:1, 0.5 mL/min, 254 nm), ee = 96%.

[α]<sub>D</sub><sup>25</sup> = +3.9 (c = 0.30, CHCl<sub>3</sub>)

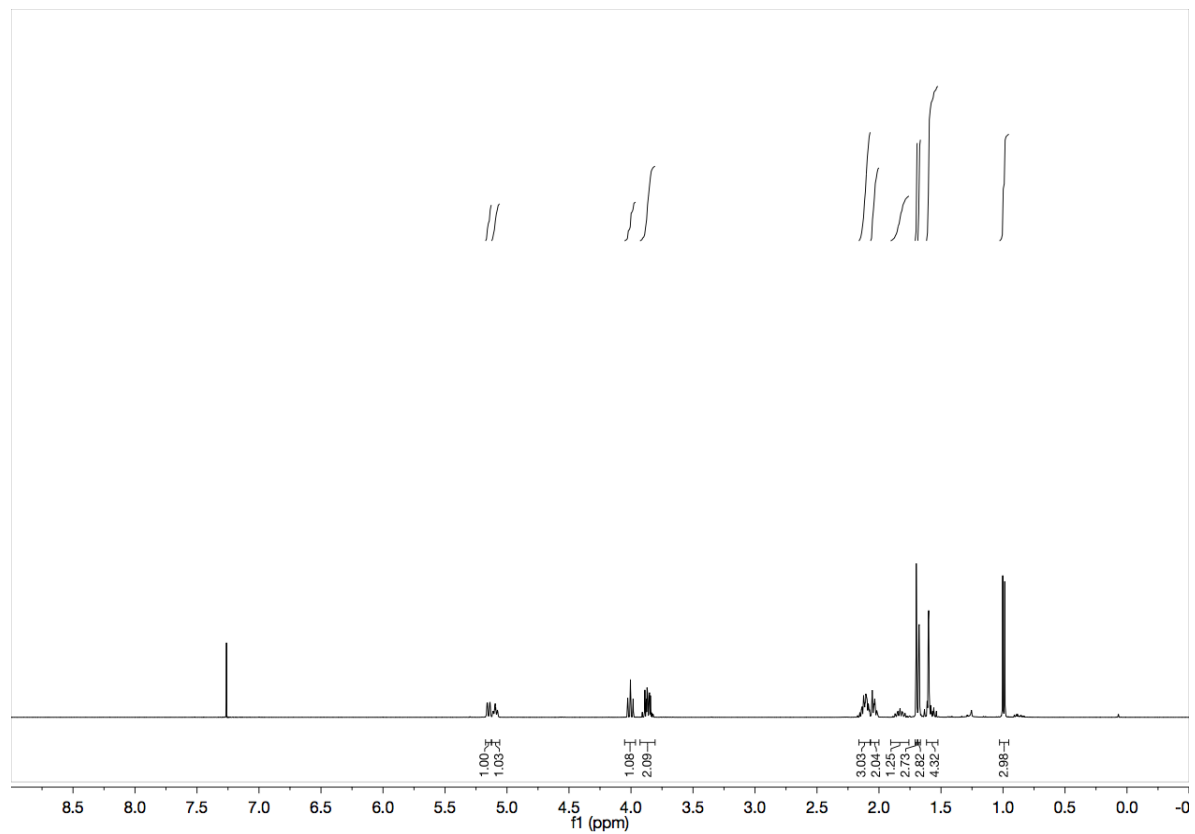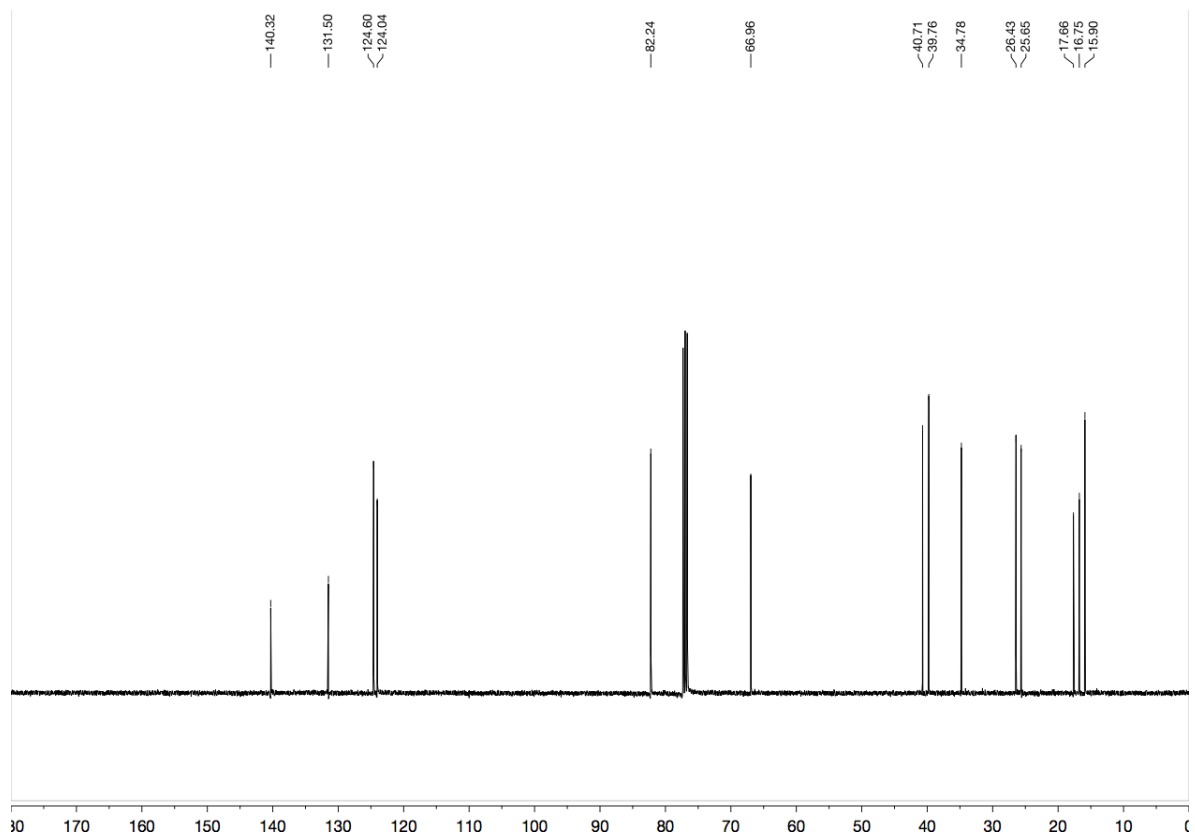

DAD1 B, Sig=210,8 Ref=360,100 (TAO\TAO 2015-06-11 11-49-14\001-0201.D)

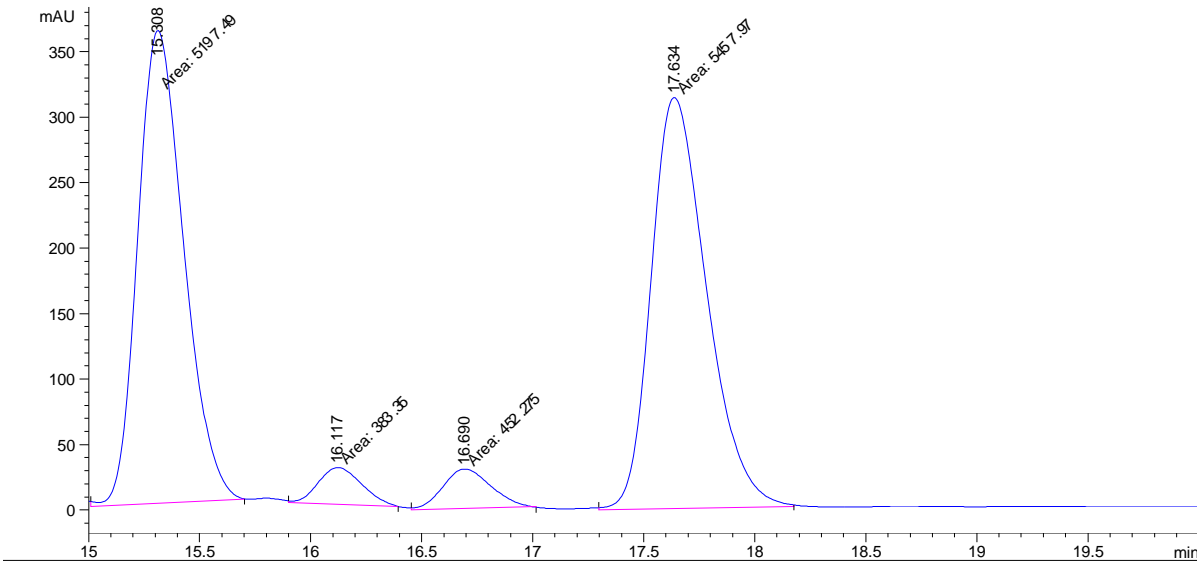

| Peak # | RetTime [min] | Type | Width [min] | Area [mAU*s] | Height [mAU] | Area %  |
|--------|---------------|------|-------------|--------------|--------------|---------|
| 1      | 15.308        | MM   | 0.2399      | 5197.48584   | 361.13022    | 45.2306 |
| 2      | 16.117        | MM   | 0.2279      | 383.35046    | 28.03022     | 3.3361  |

DAD1 B, Sig=210,8 Ref=360,100 (TAO\TAO 2015-06-14 14-36-54\001-0201.D)

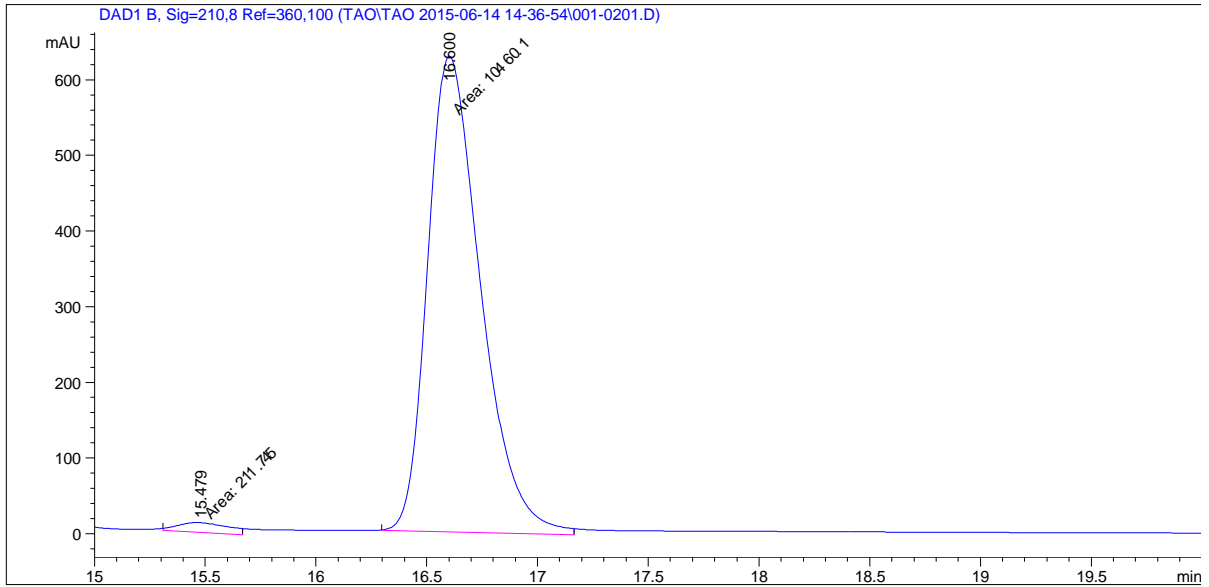

| Peak # | RetTime [min] | Type | Width [min] | Area [mAU*s] | Height [mAU] | Area %  |
|--------|---------------|------|-------------|--------------|--------------|---------|
| 1      | 15.479        | MM   | 0.2695      | 211.74541    | 13.09471     | 1.9842  |
| 2      | 16.600        | MM   | 0.2771      | 1.04601e4    | 629.16864    | 98.0158 |

**(2*R*,3*S*)-3-methyl-2-phenethyltetrahydrofuran (6m).**

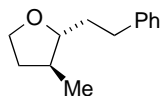

The residue was subjected to flash column chromatography for purification to furnish the title compound (72%, *dr* = >20:1) as a colorless liquid.

**R<sub>f</sub>** = 0.7 (20% EtOAc/Hexanes).

Spectral data is reported for the major isomer.

**<sup>1</sup>H NMR** (400 MHz, CDCl<sub>3</sub>) δ 7.31 – 7.26 (m, 2H), 7.24 – 7.16 (m, 3H), 3.90 – 3.80 (m, 2H), 3.34 (td, *J* = 8.2, 3.5 Hz, 1H), 2.85 (ddd, *J* = 13.7, 10.8, 5.1 Hz, 1H), 2.67 (ddd, *J* = 13.7, 10.5, 6.2 Hz, 1H), 2.15 – 2.04 (m, 1H), 1.92 – 1.69 (m, 3H), 1.59 – 1.48 (m, 1H), 1.03 (d, *J* = 6.7 Hz, 3H).

**<sup>13</sup>C NMR** (100 MHz, CDCl<sub>3</sub>): δ 142.43, 128.38, 128.29, 125.66, 85.24, 66.74, 39.05, 36.23, 34.72, 32.84, 17.23.

**LRMS** (ESI) Calcd. for C<sub>13</sub>H<sub>19</sub>O [M+H]<sup>+</sup>: 191, Found: 191.

**FTIR** (neat): 2957, 2927, 1454, 1106, 1039, 1013, 745, 699 cm<sup>-1</sup>.

**HPLC** (Chiralcel AD-H column, hexanes:*i*-PrOH = 99:1, 0.5 mL/min, 254 nm), ee = 90%.

**[α]<sub>D</sub><sup>25</sup>** = +39.2 (c = 0.31, CHCl<sub>3</sub>)



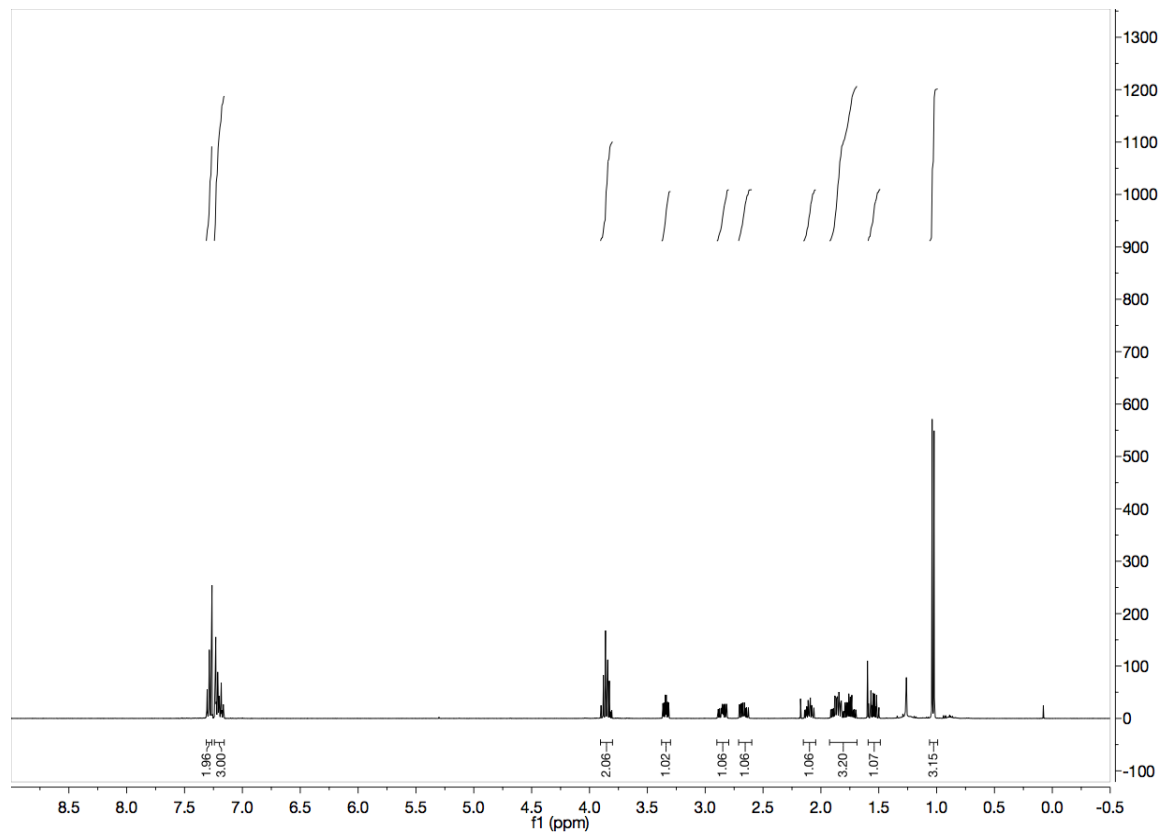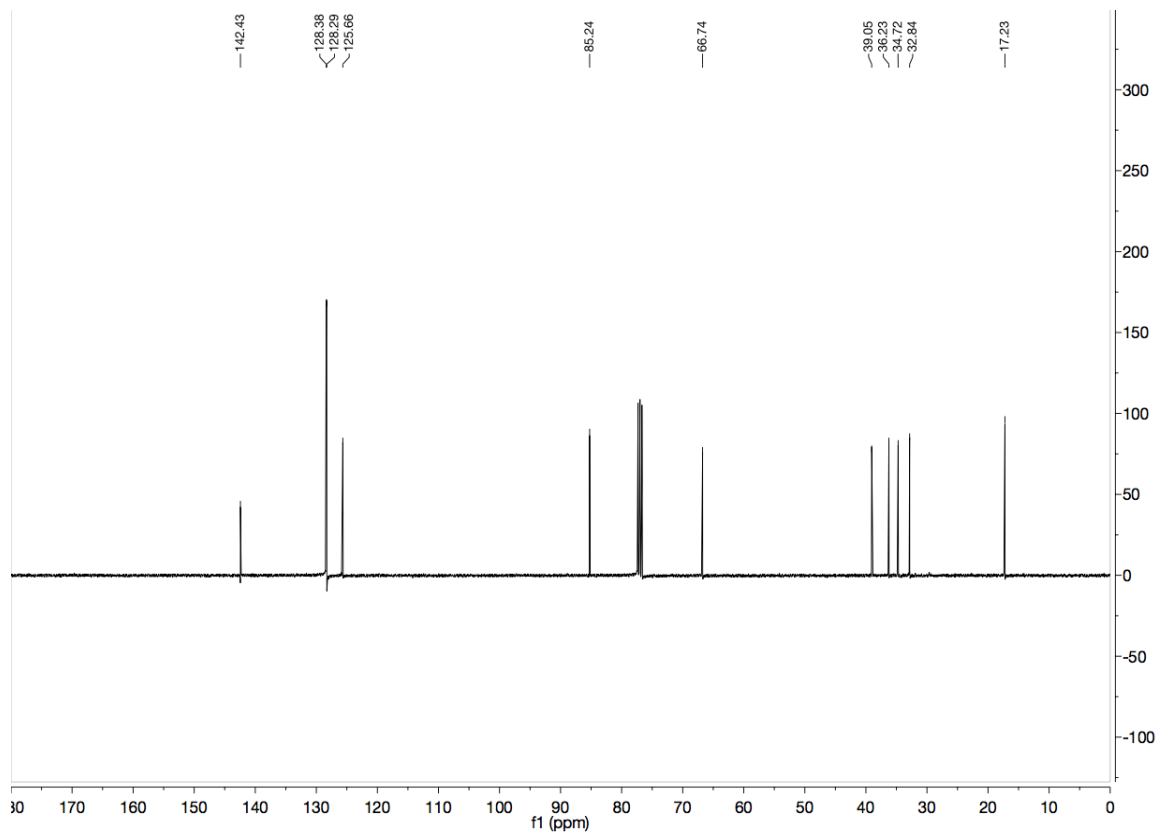

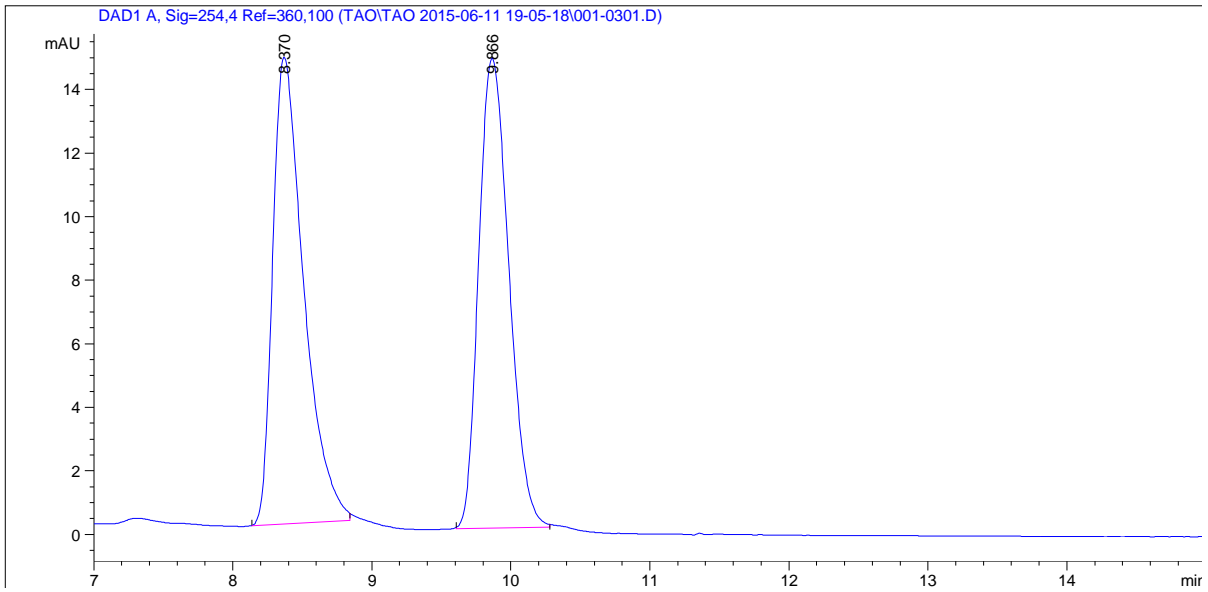

| Peak # | RetTime [min] | Type | Width [min] | Area [mAU*s] | Height [mAU] | Area %  |
|--------|---------------|------|-------------|--------------|--------------|---------|
| 1      | 8.370         | BB   | 0.2329      | 227.55005    | 14.67808     | 50.5338 |
| 2      | 9.866         | BB   | 0.2376      | 222.74254    | 14.79539     | 49.4662 |

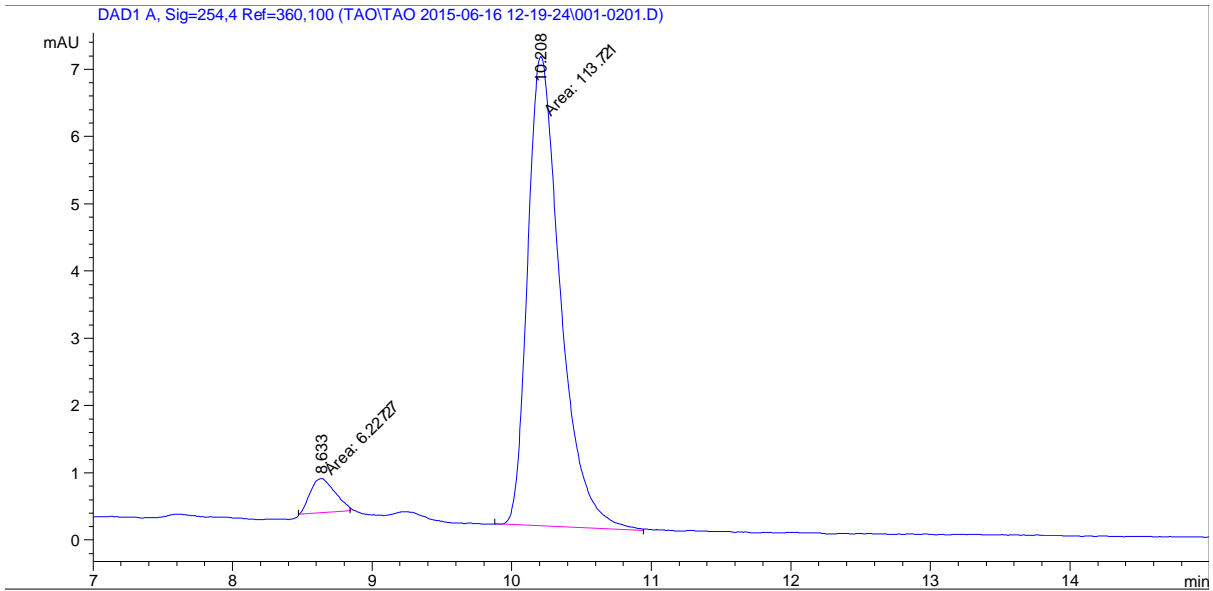

| Peak # | RetTime [min] | Type | Width [min] | Area [mAU*s] | Height [mAU] | Area %  |
|--------|---------------|------|-------------|--------------|--------------|---------|
| 1      | 8.633         | MM   | 0.2052      | 6.22727      | 5.05894e-1   | 5.1916  |
| 2      | 10.208        | MM   | 0.2717      | 113.72086    | 6.97588      | 94.8084 |

**D. General Procedure for Conversion of Alcohols 2a, 2l, 2p to *trans*-4,5-disubstituted lactones 7a, 7l and 7p**

To a resealable pressure tube (ca. 13 x 100) was added  $\text{H}_2\text{Ru}(\text{CO})(\text{PPh}_3)_3$  (9.2 mg, 0.010 mmol, 5 mol%), SL-J009-1 ligand (5.6 mg, 0.010 mmol, 5 mol%),  $\text{Bu}_4\text{NI}$  (7.4 mg, 0.020 mmol, 10 mol%) and 2,4,6-tri(2-propyl)phenylsulfonic acid (4.2 mg, 0.015 mmol, 7.5 mol%). At this stage solid alcohol coupling partners (0.20 mmol, 100 mol%) were added. The tube was then sealed with a rubber septum and purged with argon. THF (0.20 mL, 1 M concentration with respect to alcohols) was then added. At this stage, liquid alcohol coupling partners (0.20 mmol, 100 mol%) were added. 2-propylalcohol (31  $\mu\text{L}$ , 0.40 mmol, 200 mol%) was then added. Alkyne 1a (0.60 mmol, 300 mol%) was added *via* syringe and the rubber septum was quickly replaced with a screw cap. The mixture was then heated at 85 °C for the time stated. After cooling to room temperature, the mixture was passed through a short silica pad, washed the pad with EA, and concentrated *in vacuo*. The residue was dissolved in THF (2.0 mL) and TBAF (1.0 M in THF, 0.2 mL) was added at 0°C. The mixture was stirred at r.t for 30 min, and then quenched by water, extracted by DCM (3 x 1 mL). The organic layer was washed by brine, dried over  $\text{Na}_2\text{SO}_4$ . The organic solvent was evaporated down to 2 mL and 4 Å MS (100 mg), NaOAc (8.2 mg, 0.10 mmol) and PCC (129 mg, 0.60 mmol) were added, and the mixture was stirred at room temperature for 24 hours. The solvent was removed by *vacuo*, and the residue was subjected to flash column chromatography ( $\text{SiO}_2$ , eluent Hexanes:EA = 5:1) to afford the corresponding lactone products.

**(4*S*,5*S*)-4-methyl-5-phenyldihydrofuran-2(3*H*)-one (7a).**

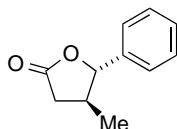

The residue was subjected to flash column chromatography for purification to furnish the title compound (70%, *dr* = >20:1) as a colorless liquid.

**R<sub>f</sub>** = 0.2 (20% EtOAc/Hexanes).

Spectral data is reported for the major isomer.

**<sup>1</sup>H NMR** (400 MHz, CDCl<sub>3</sub>) δ 7.43 – 7.31 (m, 5H), 4.94 (d, *J* = 8.3 Hz, 1H), 2.79 (dd, *J* = 16.9, 7.7 Hz, 1H), 2.55 – 2.42 (m, 1H), 2.34 (dd, *J* = 16.9, 10.5 Hz, 1H), 1.19 (d, *J* = 6.6 Hz, 3H).

**<sup>13</sup>C NMR** (100 MHz, CDCl<sub>3</sub>): δ 176.07, 137.93, 128.69, 125.90, 88.13, 39.81, 37.21, 16.49.

**LRMS** (ESI) Calcd. for C<sub>11</sub>H<sub>13</sub>O<sub>2</sub> [M+H]<sup>+</sup>: 177, Found: 177.

**FTIR** (neat): 1778, 1278, 1210, 1140, 998, 946, 756, 699 cm<sup>-1</sup>.

**HPLC** (Chiralcel OD-H column, hexanes:*i*-PrOH = 95:5, 1 mL/min, 210 nm), ee = 91%.

**[α]<sub>D</sub><sup>25</sup>** = +1.1 (c = 0.9, CHCl<sub>3</sub>)

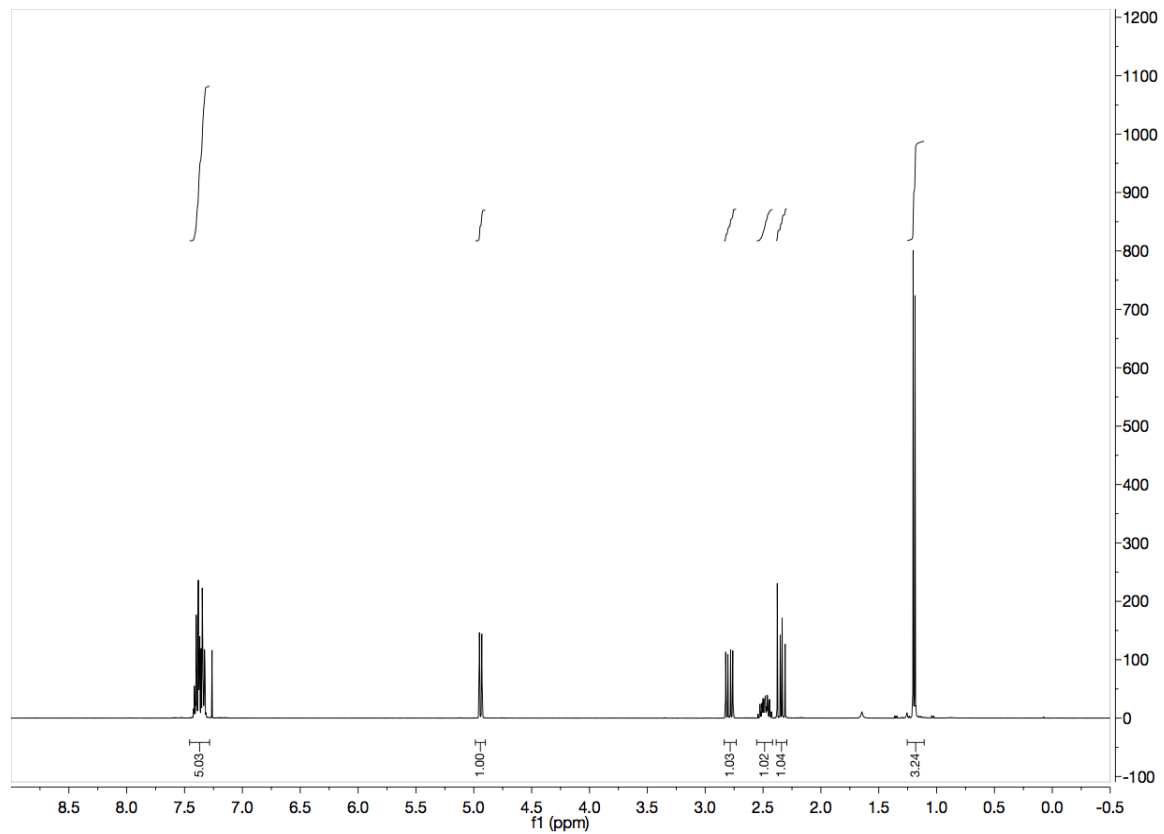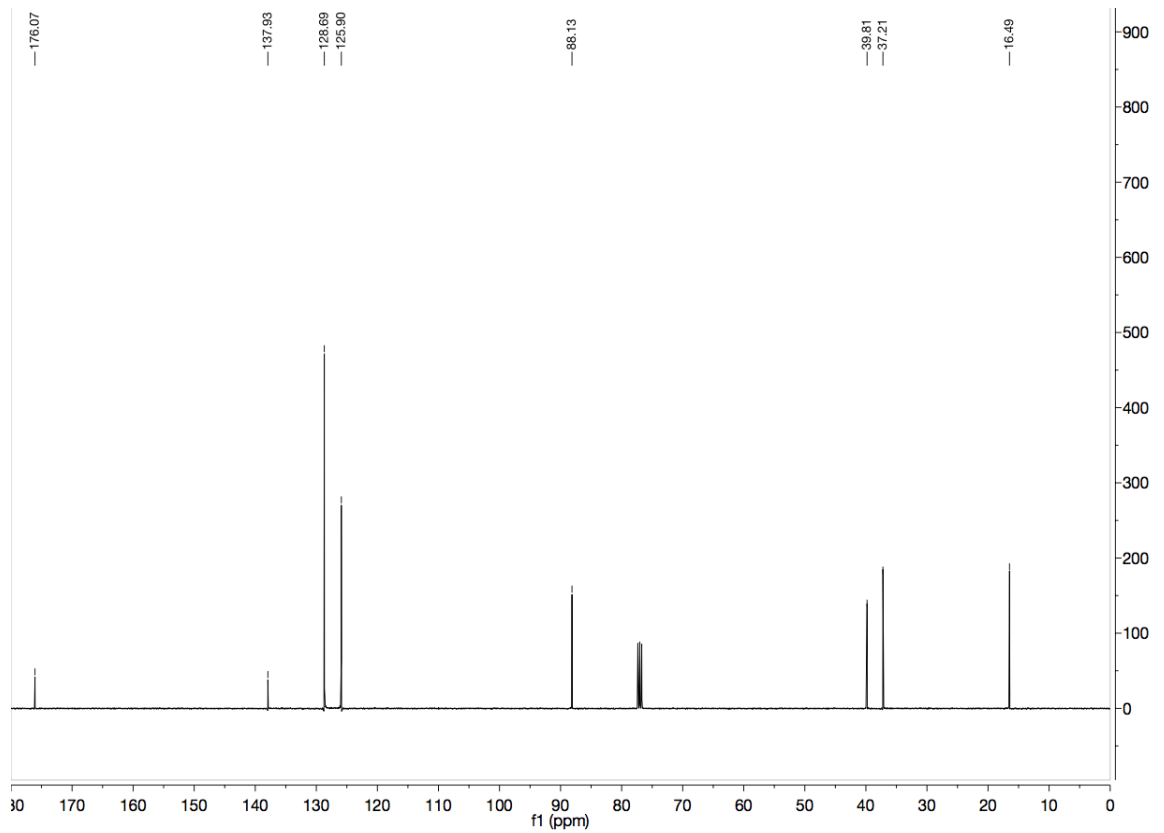

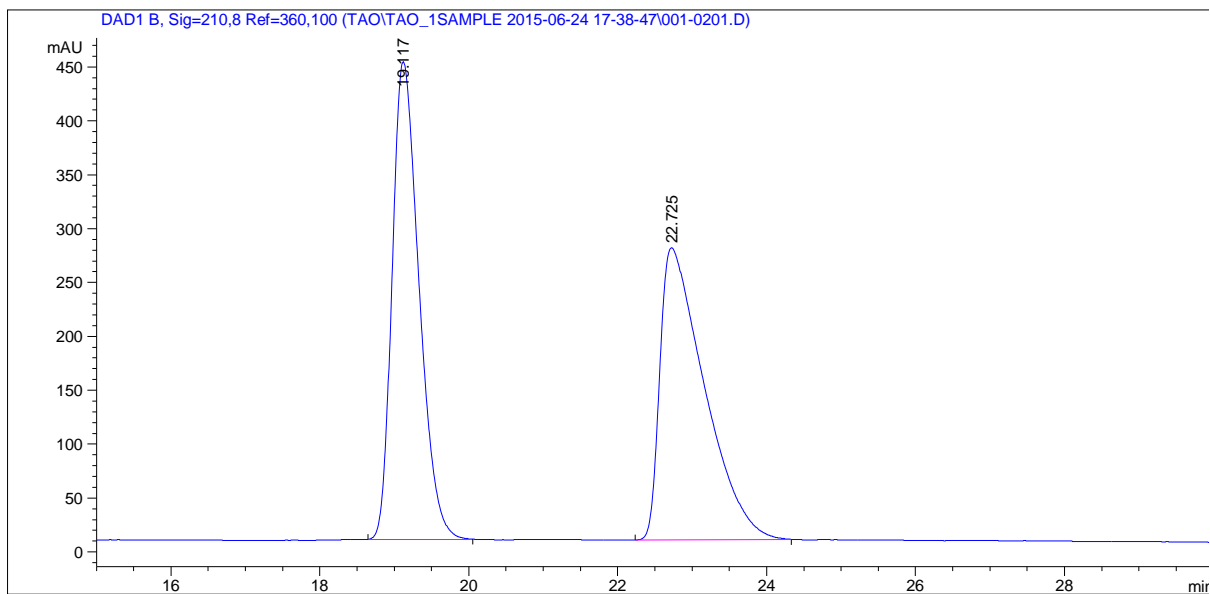

| Peak # | RetTime [min] | Type | Width [min] | Area [mAU*s] | Height [mAU] | Area %  |
|--------|---------------|------|-------------|--------------|--------------|---------|
| 1      | 19.117        | BB   | 0.3870      | 1.11370e4    | 443.40332    | 49.8286 |
| 2      | 22.725        | BB   | 0.5887      | 1.12136e4    | 271.02835    | 50.1714 |

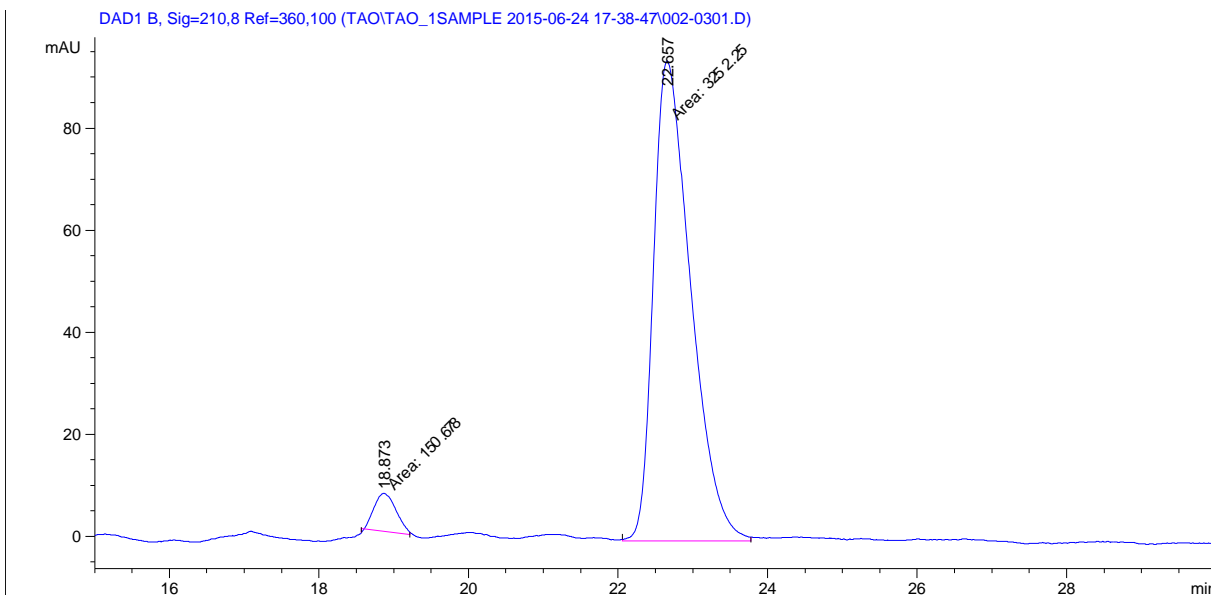

| Peak # | RetTime [min] | Type | Width [min] | Area [mAU*s] | Height [mAU] | Area %  |
|--------|---------------|------|-------------|--------------|--------------|---------|
| 1      | 18.873        | MM   | 0.3384      | 150.67789    | 7.42006      | 4.4279  |
| 2      | 22.657        | MM   | 0.5766      | 3252.25488   | 94.00772     | 95.5721 |

**(4*S*,5*S*)-4-methyl-5-((*E*)-styryl)dihydrofuran-2(3*H*)-one (71).**

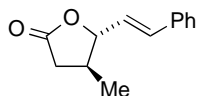

The residue was subjected to flash column chromatography for purification to furnish the title compound (76%, *dr* = >20:1) as a colorless liquid.

**R<sub>f</sub>** = 0.2 (20% EtOAc/Hexanes).

Spectral data is reported for the major isomer.

**<sup>1</sup>H NMR** (400 MHz, CDCl<sub>3</sub>) δ 7.43 – 7.27 (m, 5H), 6.70 (d, *J* = 16.3 Hz, 1H), 6.17 (dd, *J* = 15.9, 7.2 Hz, 1H), 4.58 (ddd, *J* = 8.1, 7.2, 1.1 Hz, 1H), 2.74 (dd, *J* = 16.9, 7.7 Hz, 1H), 2.46 – 2.33 (m, 1H), 2.27 (dd, *J* = 16.9, 10.2 Hz, 1H), 1.20 (d, *J* = 6.6 Hz, 3H).

**<sup>13</sup>C NMR** (100 MHz, CDCl<sub>3</sub>): δ 176.07, 135.62, 133.88, 128.70, 128.42, 126.73, 125.18, 87.46, 37.32, 36.78, 16.50.

**LRMS** (ESI) Calcd. for C<sub>13</sub>H<sub>15</sub>O<sub>2</sub> [M+H]<sup>+</sup>: 203, Found: 203.

**FTIR** (neat): 1775, 1209, 1156, 986, 968, 939, 750, 693 cm<sup>-1</sup>.

**HPLC** (Chiralcel OD-H column, hexanes:*i*-PrOH = 95:5, 1 mL/min, 210 nm), ee = 93%.

**[α]<sub>D</sub><sup>25</sup>** = +47.5 (c = 0.4, CHCl<sub>3</sub>)

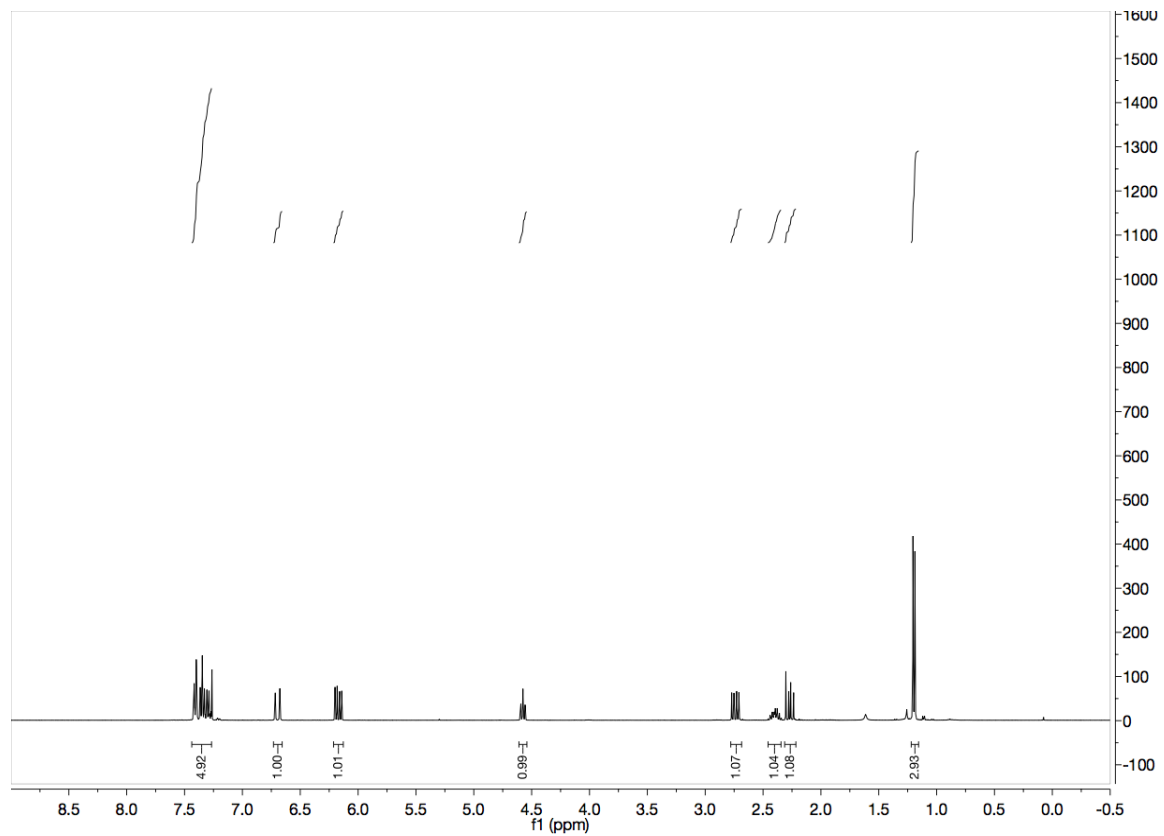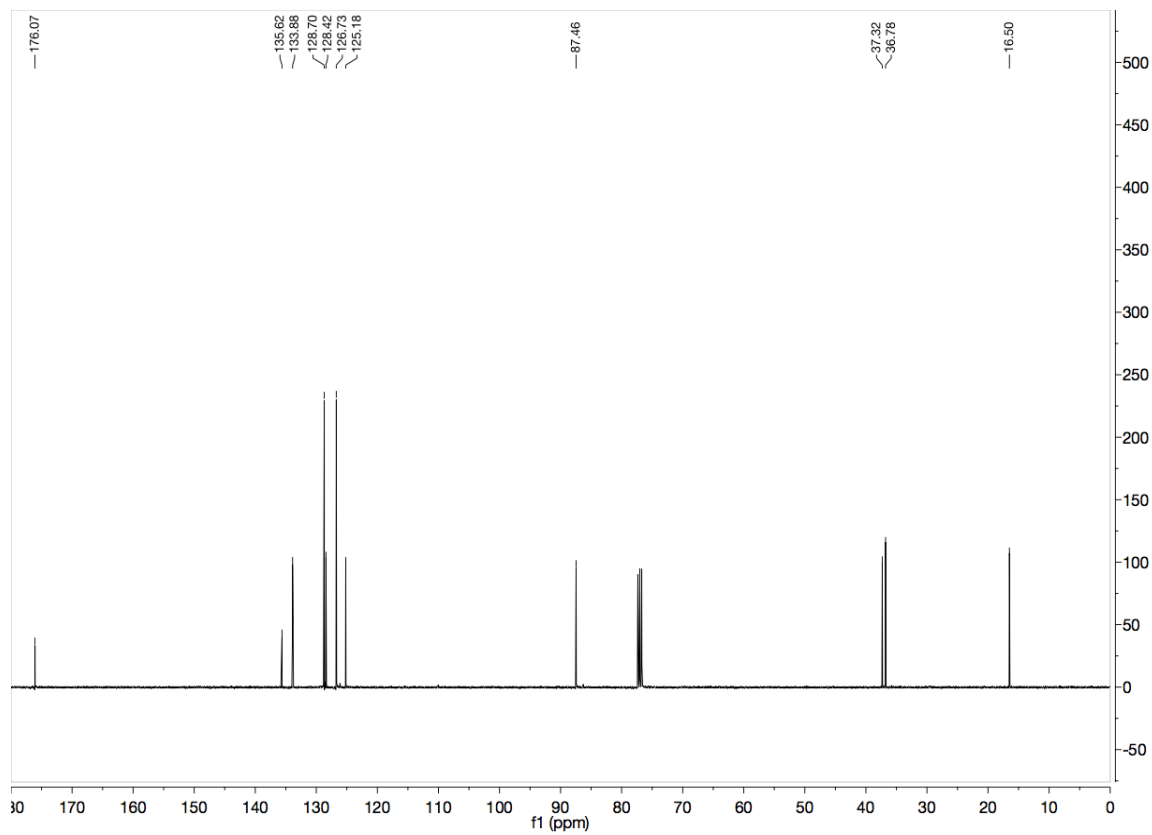



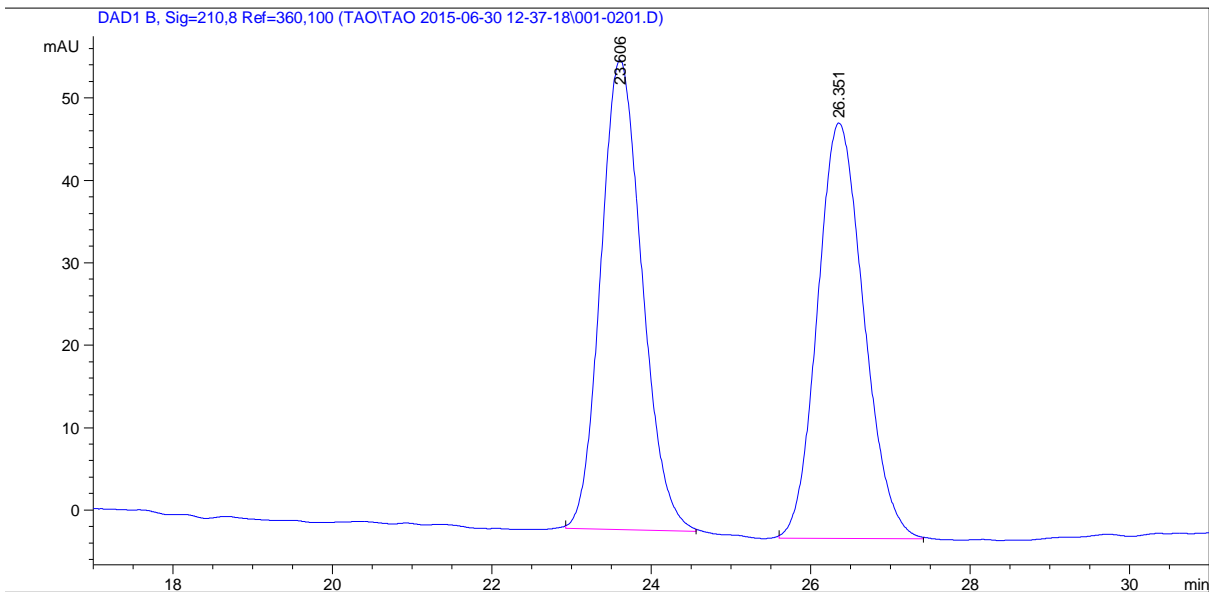

| Peak # | RetTime [min] | Type | Width [min] | Area [mAU*s] | Height [mAU] | Area %  |
|--------|---------------|------|-------------|--------------|--------------|---------|
| 1      | 23.606        | BB   | 0.5565      | 2052.90649   | 56.96287     | 50.3022 |
| 2      | 26.351        | BB   | 0.6218      | 2028.24023   | 50.36858     | 49.6978 |

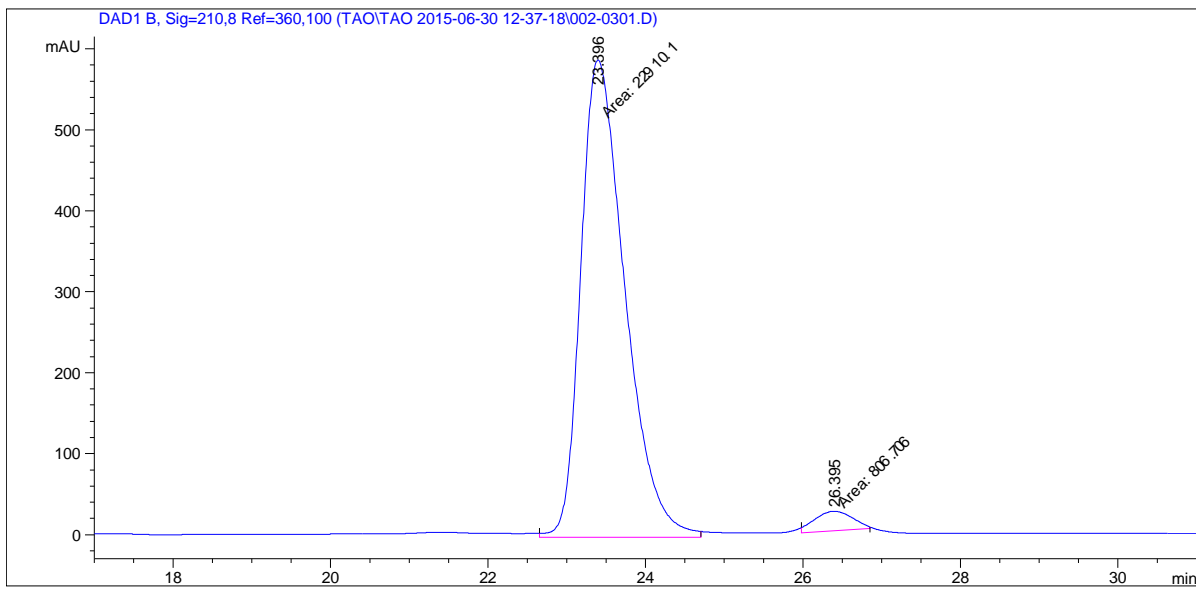

| Peak # | RetTime [min] | Type | Width [min] | Area [mAU*s] | Height [mAU] | Area %  |
|--------|---------------|------|-------------|--------------|--------------|---------|
| 1      | 23.396        | MM   | 0.6482      | 2.29101e4    | 589.07062    | 96.5986 |
| 2      | 26.395        | MM   | 0.5590      | 806.70642    | 24.05120     | 3.4014  |

**(4*S*,5*R*)-5-butyl-4-methyldihydrofuran-2(3*H*)-one (7p).**

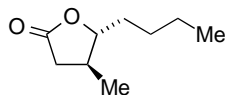

The residue was subjected to flash column chromatography for purification to furnish the title compound (72%, *dr* = >20:1) as a colorless liquid.

**R<sub>f</sub>** = 0.2 (20% EtOAc/Hexanes).

Spectral data is reported for the major isomer.

**<sup>1</sup>H NMR** (400 MHz, CDCl<sub>3</sub>) δ 4.00 (td, *J* = 8.0, 4.1 Hz, 1H), 2.72 – 2.60 (m, 1H), 2.26 – 2.13 (m, 2H), 1.72 – 1.56 (m, 2H), 1.55 – 1.44 (m, 1H), 1.42 – 1.30 (m, 3H), 1.13 (d, *J* = 6.4 Hz, 3H), 0.91 (t, *J* = 7.1 Hz, 3H).

**<sup>13</sup>C NMR** (100 MHz, CDCl<sub>3</sub>): δ 176.59, 87.44, 37.11, 36.06, 33.68, 27.83, 22.46, 17.47, 13.88.

**LRMS** (ESI) Calcd. for C<sub>9</sub>H<sub>17</sub>O<sub>2</sub> [M+H]<sup>+</sup>: 157, Found: 157.

**FTIR** (neat): 1775, 1210, 1170, 1124, 1077, 984, 942, 926 cm<sup>-1</sup>.

**HPLC** (Chiralcel OD-H/OD-H/OD-H column, hexanes:*i*-PrOH = 99:1, 0.5 mL/min, 230 nm), ee = 90%.

[α]<sub>D</sub><sup>25</sup> = +59.6 (c = 0.71, CHCl<sub>3</sub>)

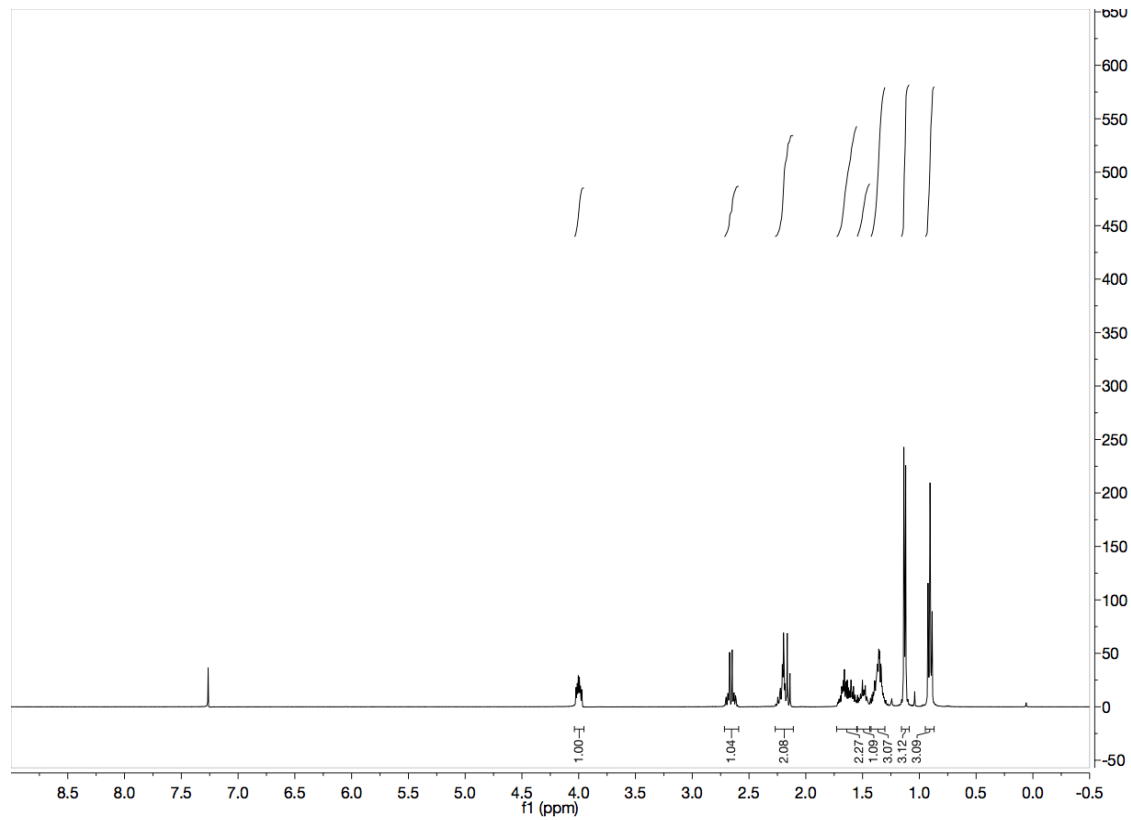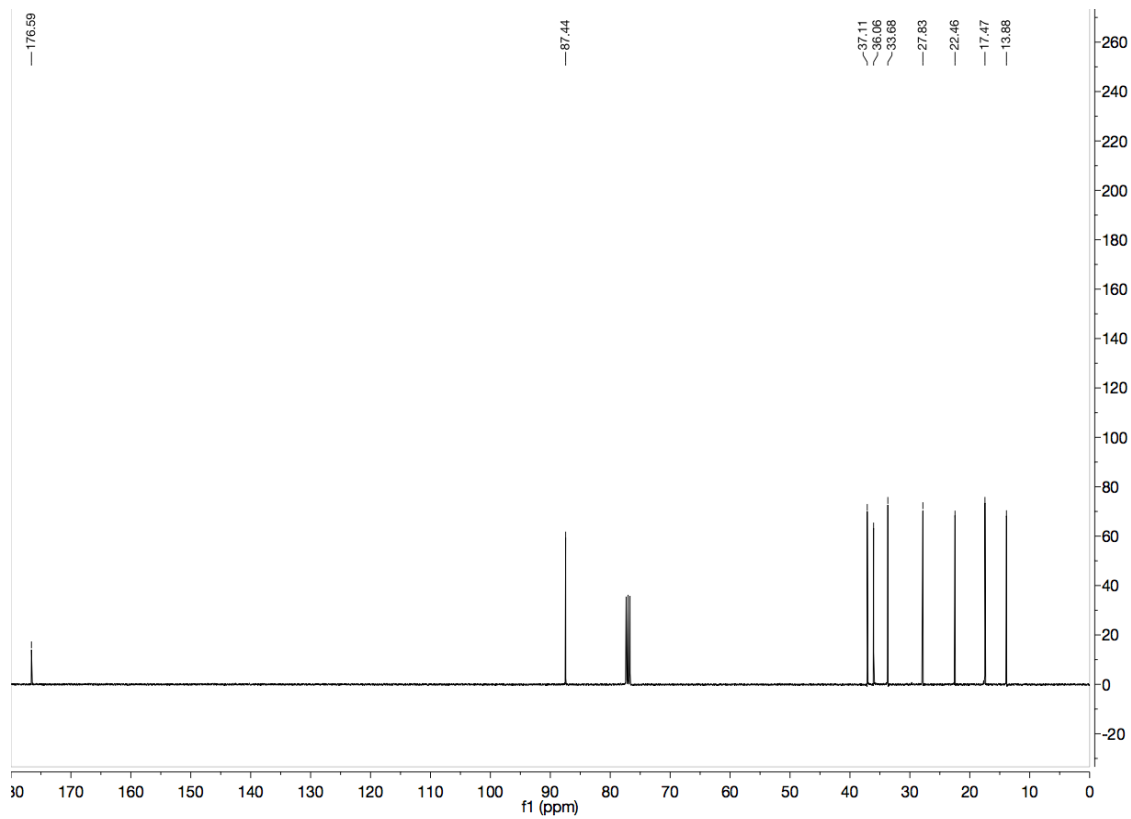

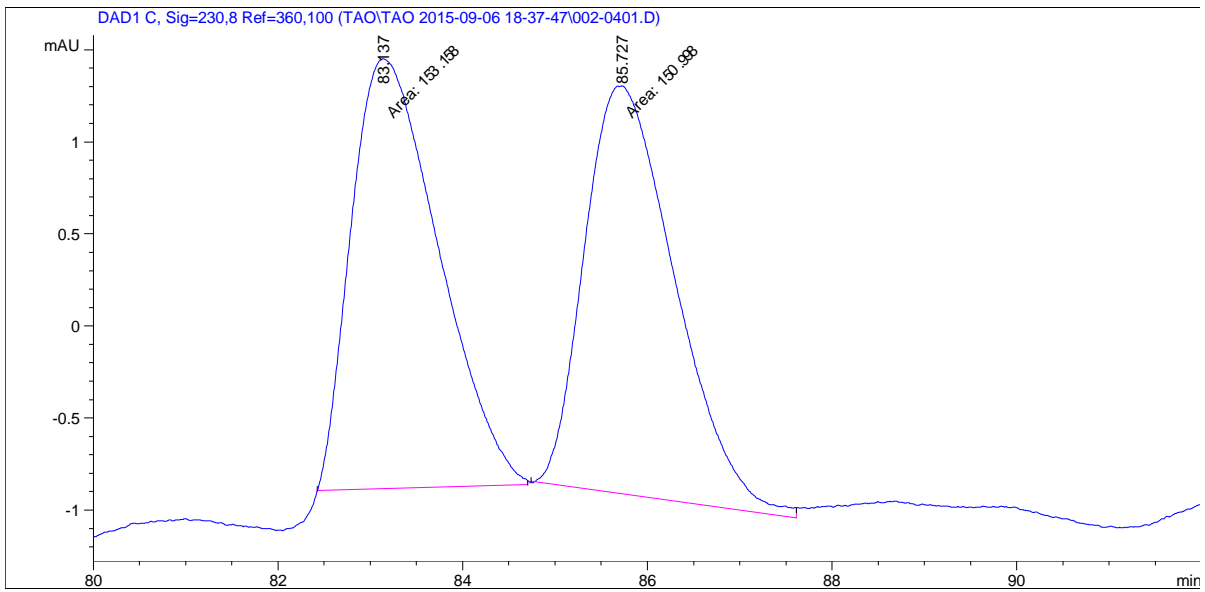

| Peak # | RetTime [min] | Type | Width [min] | Area [mAU*s] | Height [mAU] | Area %  |
|--------|---------------|------|-------------|--------------|--------------|---------|
| 1      | 83.137        | MM   | 1.0936      | 153.15843    | 2.33419      | 50.3552 |
| 2      | 85.727        | MM   | 1.1356      | 150.99785    | 2.21610      | 49.6448 |

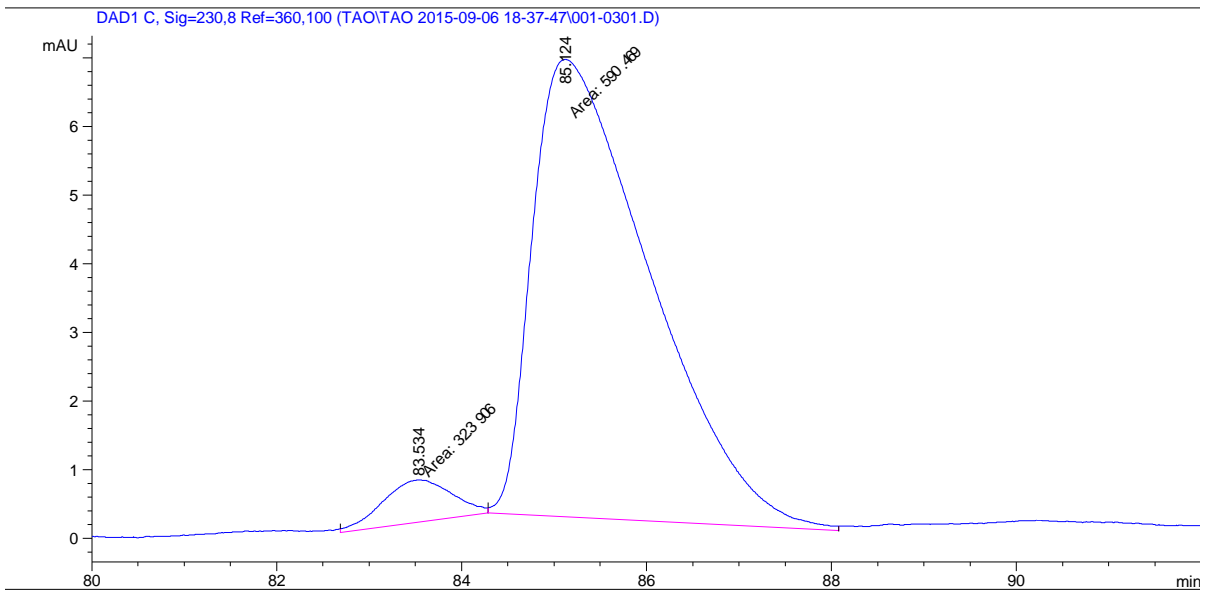

| Peak # | RetTime [min] | Type | Width [min] | Area [mAU*s] | Height [mAU] | Area %  |
|--------|---------------|------|-------------|--------------|--------------|---------|
| 1      | 83.534        | MM   | 0.6246      | 32.39059     | 6.15862e-1   | 5.2003  |
| 2      | 85.124        | MM   | 1.4763      | 590.46930    | 6.66621      | 94.7997 |

### E. Formation of trans-4,5-disubstituted-2,3-dehydrofuran 8a

To a resealable pressure tube (ca. 13 x 100) was added  $\text{H}_2\text{Ru}(\text{CO})(\text{PPh}_3)_3$  (9.2 mg, 0.010 mmol, 5 mol%), SL-J009-1 ligand (5.6 mg, 0.010 mmol, 5 mol%),  $\text{Bu}_4\text{NI}$  (7.4 mg, 0.020 mmol, 10 mol%) and 2,4,6-tri(2-propyl)phenylsulfonic acid (4.2 mg, 0.015 mmol, 7.5 mol%). THF (0.20 mL, 1 M concentration with respect to alcohols) was then added, followed by benzyl alcohol (0.20 mmol, 100 mol%), 2-propylalcohol (31  $\mu\text{L}$ , 0.40 mmol, 200 mol%). Alkyne 1a (0.60 mmol, 300 mol%) was added *via* syringe and the rubber septum was quickly replaced with a screw cap. The mixture was then heated at 85 °C for 48 hours. After cooling to room temperature, the mixture was passed through a short silica pad, washed the pad with EA, and concentrated *in vacuo*. The residue was dissolved in THF (2.0 mL) and TBAF (1.0 M in THF, 0.2 mL) was added at 0°C. The mixture was stirred at r.t for 30 min, and then quenched by water, extracted by DCM (3 x 1 mL). The organic layer was washed by brine, dried over  $\text{Na}_2\text{SO}_4$ . The organic solvent was evaporated and THF (2 mL) was added, followed by MsCl (45.6 mg, 0.4 mmol) and triethyl amine (121 mg, 1.2 mmol). The mixture was refluxed for 1 hour and then quenched by  $\text{NH}_4\text{Cl}$ , extracted by ether (3 x 1 mL). The organic layer was washed by water, brine, dried over  $\text{Na}_2\text{SO}_4$ . The solvent was removed by *vacuo*, and the residue was subjected to flash column chromatography ( $\text{SiO}_2$ , eluent Pentane: $\text{Et}_2\text{O}$  = 9:1) to afford the dehydrofuran 8a (61%, *dr* = >20:1) as colorless liquid.

#### (2*S*,3*S*)-3-methyl-2-phenyl-2,3-dihydrofuran (8a).

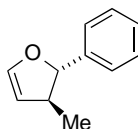

$R_f$  = 0.3 (20% EtOAc/Hexanes).

Spectral data is reported for the major isomer.

**$^1\text{H NMR}$**  (400 MHz,  $\text{CDCl}_3$ )  $\delta$  7.39 – 7.27 (m, 5H), 6.45 (dd,  $J$  = 2.8, 2.1 Hz, 1H), 4.97 – 4.90 (m, 2H), 3.04 – 2.90 (m, 1H), 1.23 (d,  $J$  = 6.7 Hz, 3H).

**$^{13}\text{C NMR}$**  (100 MHz,  $\text{CDCl}_3$ ):  $\delta$  144.74, 142.41, 128.51, 127.70, 125.46, 105.78, 90.15, 45.93, 20.78.

**LRMS** (ESI) Calcd. for  $\text{C}_{11}\text{H}_{13}\text{O}$   $[\text{M}+\text{H}]^+$ : 161, Found: 161.

**FTIR** (neat): 2359, 2341, 1140, 1095, 1011, 721, 697, 669  $\text{cm}^{-1}$ .

**HPLC** (Chiralcel OD-H column, hexanes:*i*-PrOH = 99:1, 0.5 mL/min, 210 nm), ee = 91%.

$[\alpha]_D^{25}$  = +171.4 ( $c$  = 0.34,  $\text{CHCl}_3$ )

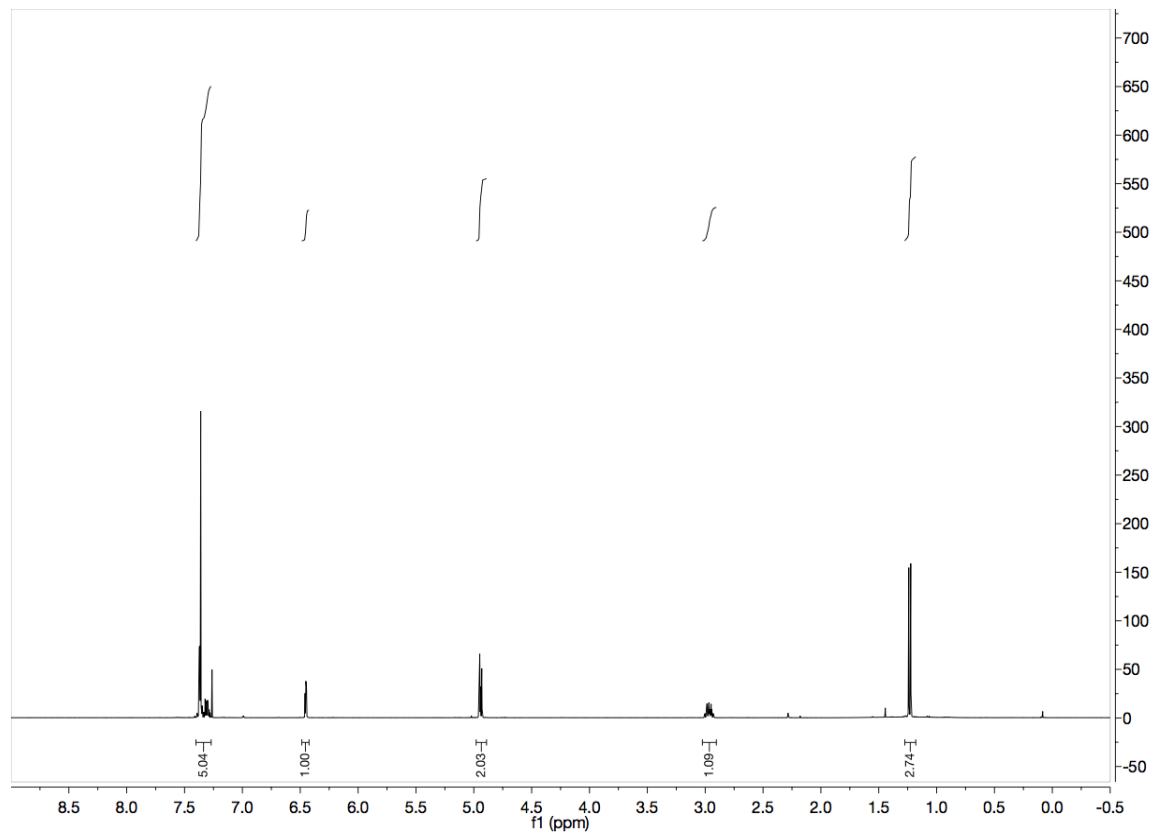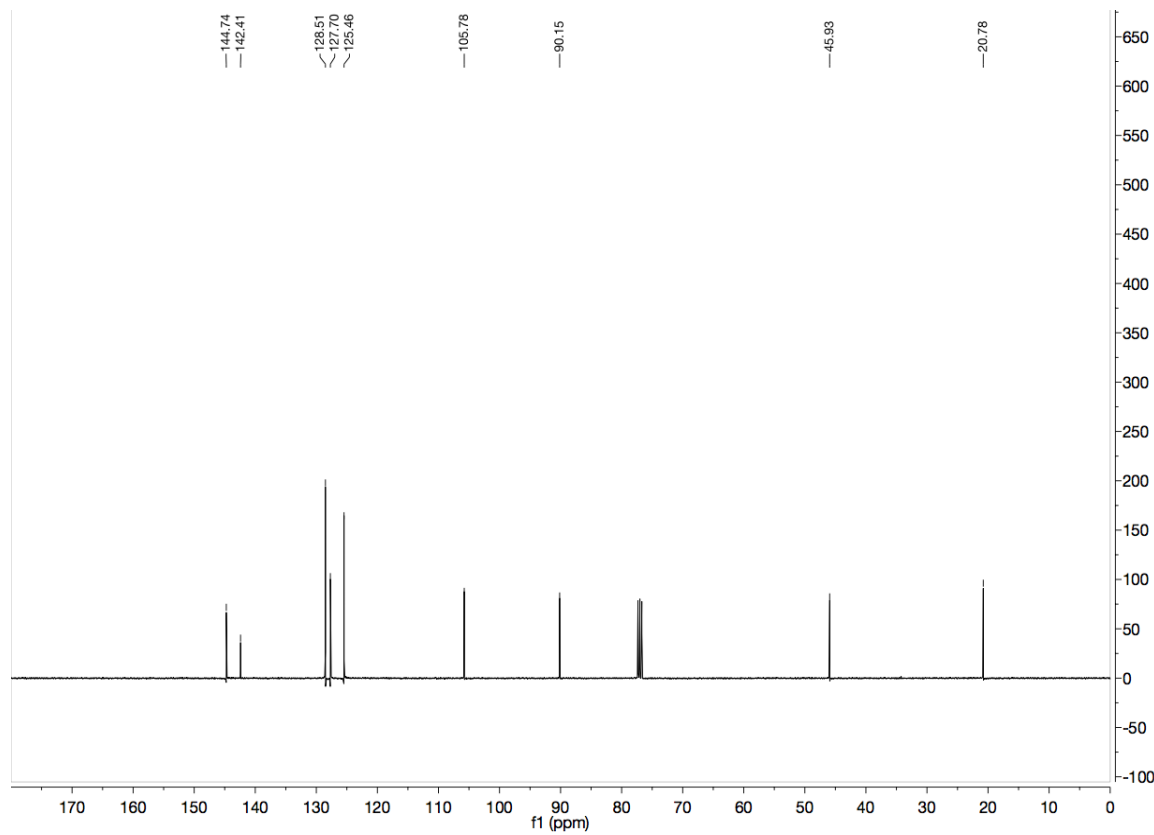

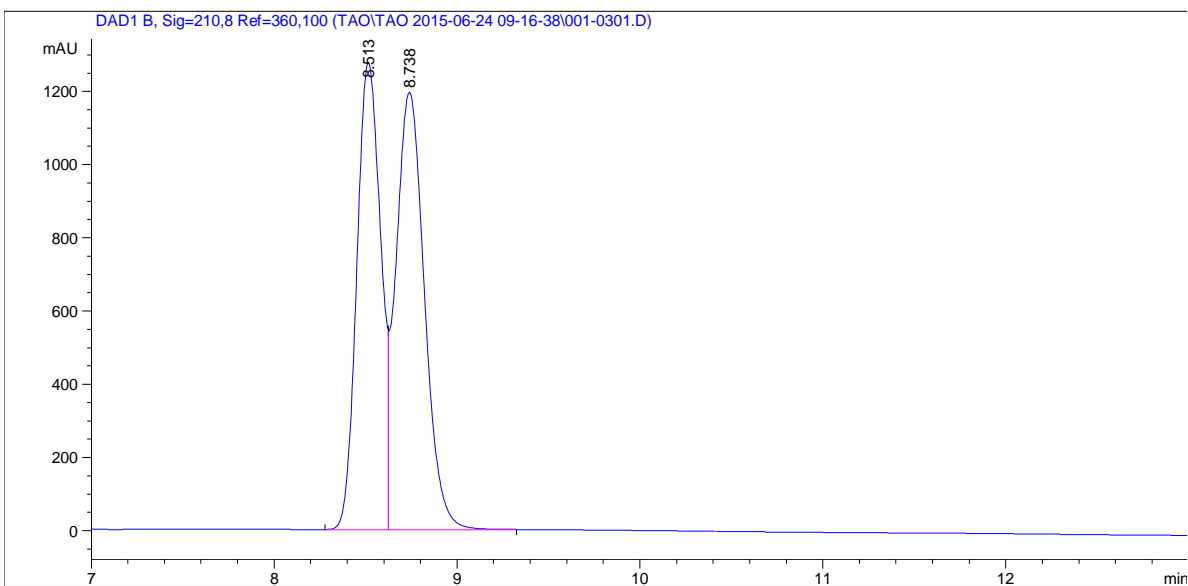

| Peak # | RetTime [min] | Type | Width [min] | Area [mAU*s] | Height [mAU] | Area %  |
|--------|---------------|------|-------------|--------------|--------------|---------|
| 1      | 8.513         | BV   | 0.1425      | 1.16507e4    | 1276.80237   | 47.5093 |
| 2      | 8.738         | VB   | 0.1637      | 1.28723e4    | 1194.92786   | 52.4907 |

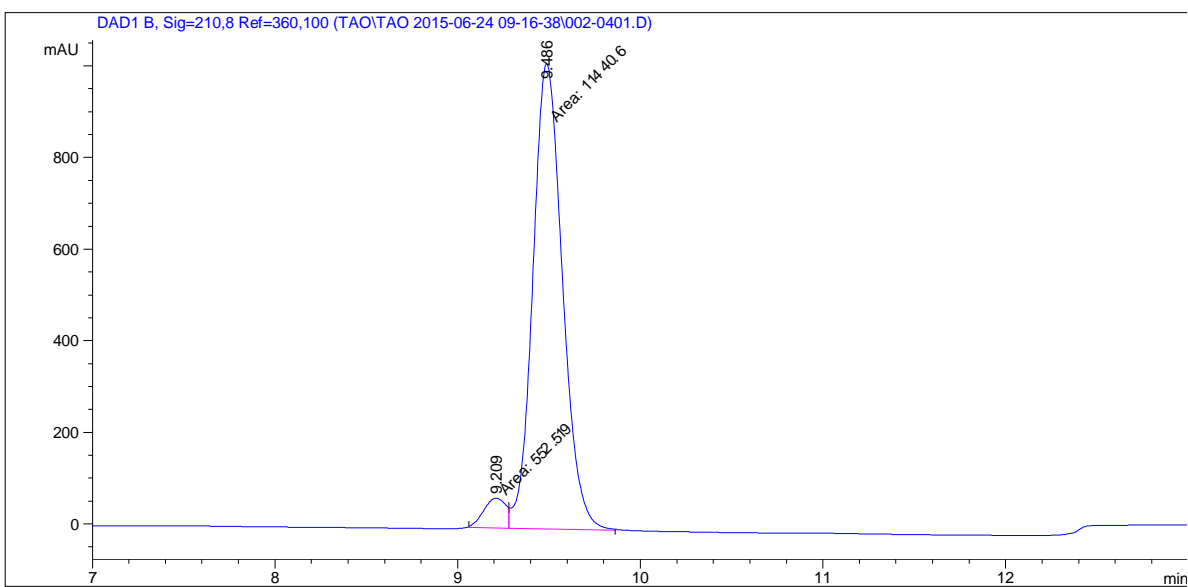

| Peak # | RetTime [min] | Type | Width [min] | Area [mAU*s] | Height [mAU] | Area %  |
|--------|---------------|------|-------------|--------------|--------------|---------|
| 1      | 9.209         | MF   | 0.1417      | 552.51855    | 64.98923     | 4.6070  |
| 2      | 9.486         | FM   | 0.1877      | 1.14406e4    | 1016.07440   | 95.3930 |

## F. Formation of 9a

To a resealable pressure tube (ca. 13 x 100) was added  $\text{H}_2\text{Ru}(\text{CO})(\text{PPh}_3)_3$  (9.2 mg, 0.010 mmol, 5 mol%), SL-J009-1 ligand (5.6 mg, 0.010 mmol, 5 mol%),  $\text{Bu}_4\text{NI}$  (7.4 mg, 0.020 mmol, 10 mol%) and 2,4,6-tri(2-propyl)phenylsulfonic acid (4.2 mg, 0.015 mmol, 7.5 mol%). THF (0.20 mL, 1 M concentration with respect to alcohols) was then added, followed by benzyl alcohol (0.20 mmol, 100 mol%), 2-propylalcohol (31  $\mu\text{L}$ , 0.40 mmol, 200 mol%). Alkyne 1a (0.60 mmol, 300 mol%) was added *via* syringe and the rubber septum was quickly replaced with a screw cap. The mixture was then heated at 85 °C for 48 hours. After cooling to room temperature, the mixture was passed through a short silica pad, washed the pad with EA, and concentrated *in vacuo*. The residue was dissolved in THF (4.0 mL, 0.05 M) and TBAF (1.0 M in THF, 0.2 mL) was added at 0°C. The mixture was stirred at r.t for 30 min, and then (Carbethoxymethylene)triphenylphosphorane (208 mg, 0.6 mmol) was added. The mixture was stirred at room temperature for 36 hours. The solvent was removed by *vacuo*, and the residue was subjected to flash column chromatography ( $\text{SiO}_2$ , eluent Hexanes:EA = 6:1) to afford 9a (71%,  $dr = >20:1$ ,  $E/Z = >20:1$ ) as colorless liquid.

### Ethyl (5*S*,6*S*,*E*)-6-hydroxy-5-methyl-6-phenylhex-2-enoate (9a).

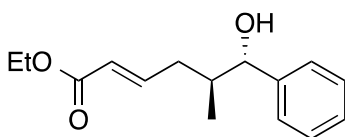

$R_f = 0.2$  (20% EtOAc/Hexanes).

Spectral data is reported for the major isomer.

**$^1\text{H NMR}$**  (400 MHz,  $\text{CDCl}_3$ )  $\delta$  7.38 – 7.27 (m, 5H), 6.97 (ddd,  $J = 15.6, 8.4, 6.6$  Hz, 1H), 5.85 (dd,  $J = 15.6, 1.7$  Hz, 1H), 4.43 (d,  $J = 7.3$  Hz, 1H), 4.18 (q,  $J = 7.1$  Hz, 2H), 2.61 – 2.51 (m, 1H), 2.15 (ddd,  $J = 14.2, 8.6, 1.3$  Hz, 1H), 2.06 – 1.95 (m, 2H), 1.28 (t,  $J = 7.1$  Hz, 3H), 0.77 (d,  $J = 6.8$  Hz, 3H).

**$^{13}\text{C NMR}$**  (100 MHz,  $\text{CDCl}_3$ ):  $\delta$  166.58, 147.83, 143.08, 128.38, 128.36, 127.73, 126.56, 122.80, 78.34, 60.17, 39.68, 35.13, 15.98, 14.27.

**LRMS** (ESI) Calcd. for  $\text{C}_{15}\text{H}_{21}\text{O}_3$   $[\text{M}+\text{H}]^+$ : 249, Found: 249.

**FTIR** (neat): 1699, 1651, 1311, 1270, 1172, 1041, 982, 762, 701  $\text{cm}^{-1}$ .

**HPLC** (Chiralcel OD-H column, hexanes:*i*-PrOH = 95:5, 1 mL/min, 210 nm), ee = 91%.

$[\alpha]_D^{25} = -11.3$  ( $c = 1.2$ ,  $\text{CHCl}_3$ )



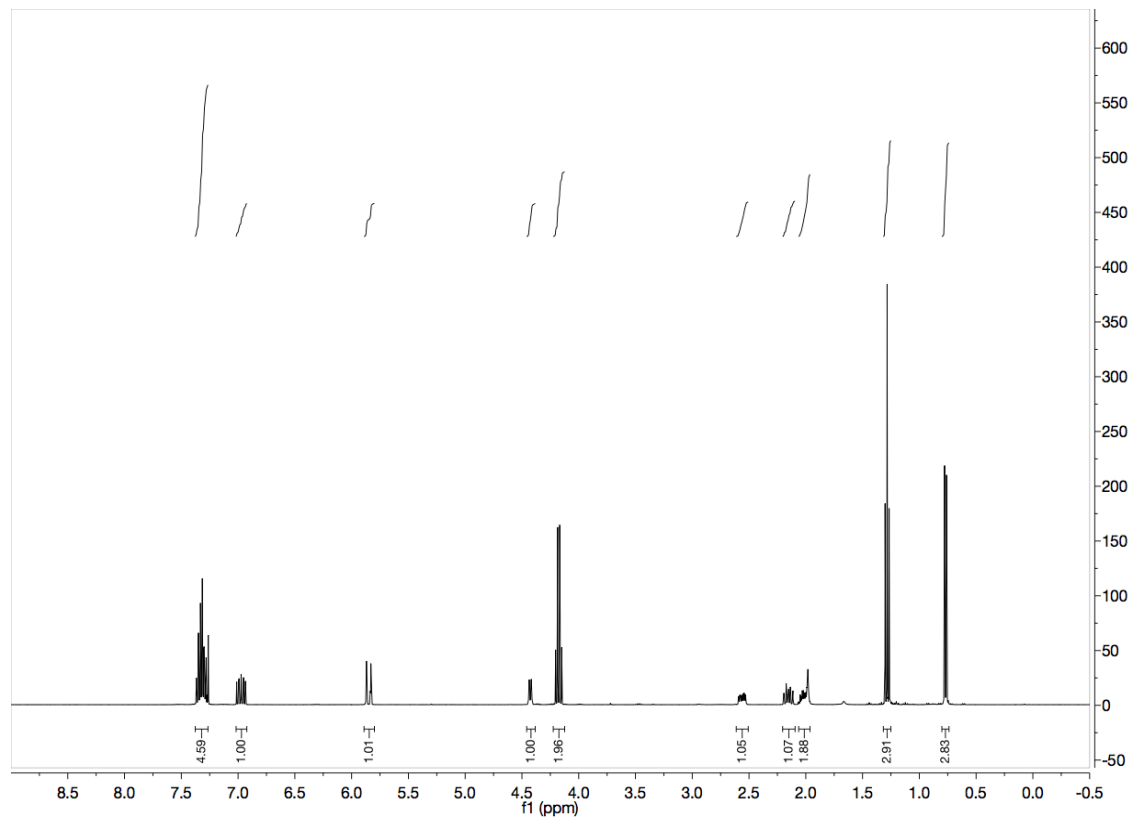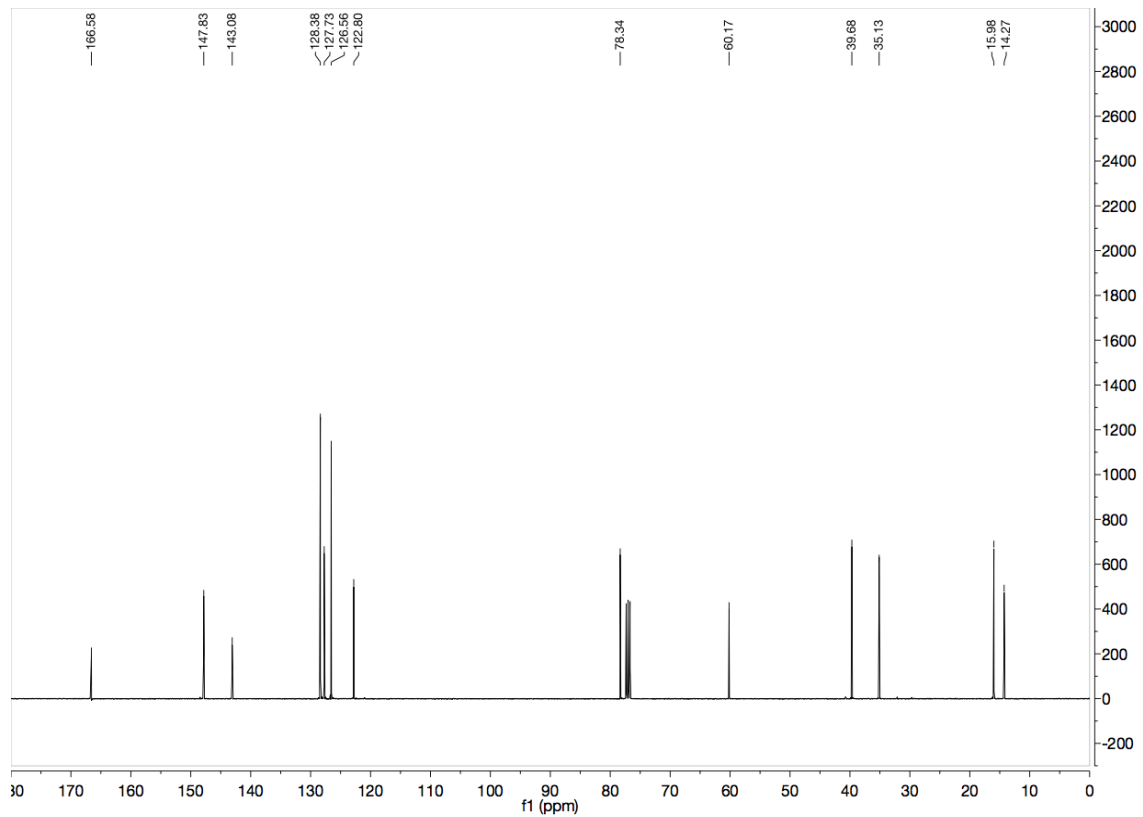

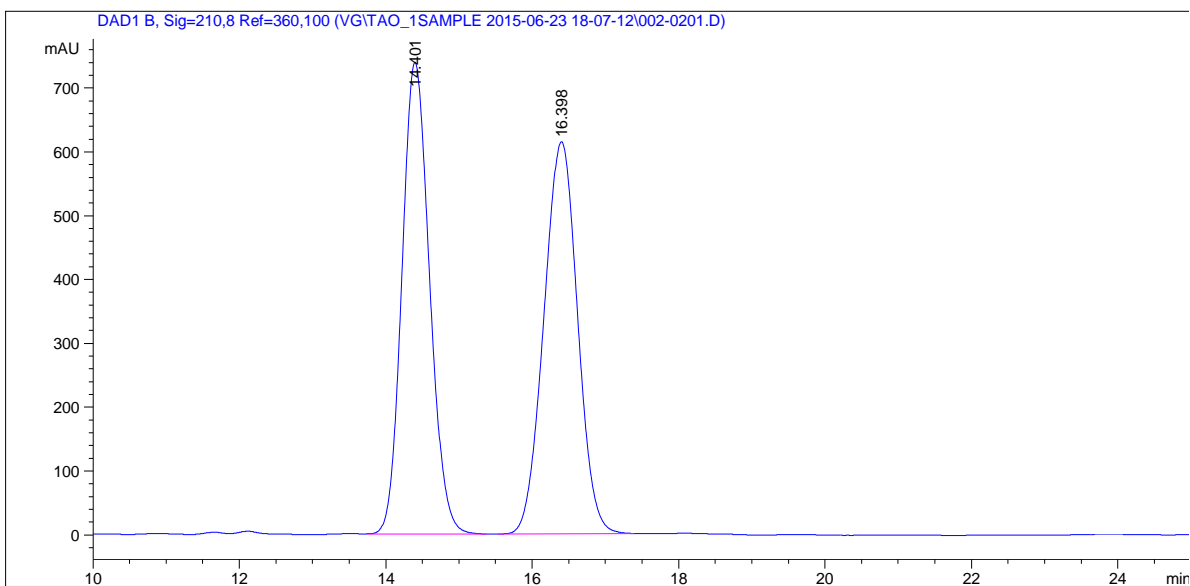

| Peak # | RetTime [min] | Type | Width [min] | Area [mAU*s] | Height [mAU] | Area %  |
|--------|---------------|------|-------------|--------------|--------------|---------|
| 1      | 14.401        | BB   | 0.4108      | 1.94268e4    | 738.85236    | 49.7849 |
| 2      | 16.398        | BB   | 0.5020      | 1.95947e4    | 614.55487    | 50.2151 |

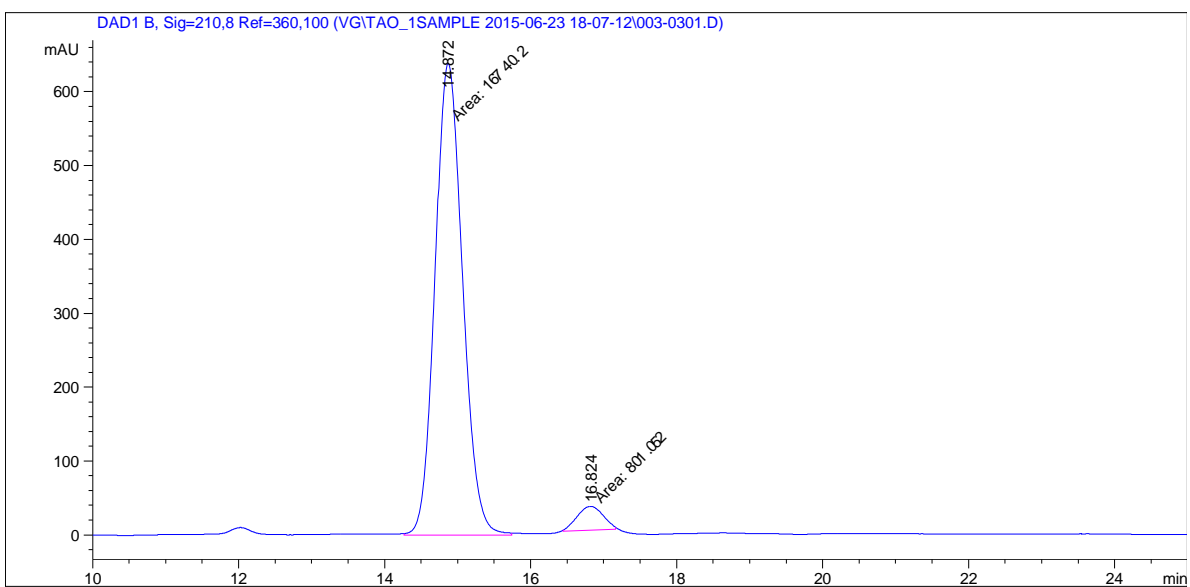

| Peak # | RetTime [min] | Type | Width [min] | Area [mAU*s] | Height [mAU] | Area %  |
|--------|---------------|------|-------------|--------------|--------------|---------|
| 1      | 14.872        | MM   | 0.4368      | 1.67402e4    | 638.75323    | 95.4333 |
| 2      | 16.824        | MM   | 0.4139      | 801.05170    | 32.25486     | 4.5667  |

## G. Crystallographic Material for Coupling product 5c

### X-ray Experimental for $C_{11}H_{15}O_2Br$ (5c)

Crystals grew as clusters of clear, colorless prisms by slow evaporation from Ethyl Acetate and DCM. The data crystal was cut from a larger crystal and had approximate dimensions; 0.38 x 0.27 x 0.08 mm. The data were collected at -140 °C on a Nonius Kappa CCD diffractometer using a Bruker AXS Apex II detector and a graphite monochromator with MoK $\alpha$  radiation ( $\lambda = 0.71073\text{\AA}$ ). Reduced temperatures were maintained by use of an Oxford Cryosystems 600 low-temperature device. A total of 1011 frames of data were collected using  $\omega$  and  $\phi$ -scans with a scan range of 2° and a counting time of 48 seconds per frame. Details of crystal data, data collection and structure refinement are listed in Table 1. Data reduction were performed using SAINT V8.27B.<sup>1</sup> The structure was solved by direct methods using SUPERFLIP<sup>2</sup> and refined by full-matrix least-squares on F<sup>2</sup> with anisotropic displacement parameters for the non-H atoms using SHELXL-2013.<sup>3</sup> Structure analysis was aided by use of the programs PLATON98<sup>4</sup> and WinGX.<sup>5</sup> The hydrogen atoms bound to carbon atoms were calculated in idealized positions. The hydrogen atoms on the hydroxyl oxygen atoms were observed in a  $\Delta F$  map and refined with isotropic displacement parameters. The absolute structure was determined by the method of Flack.<sup>6</sup> The Flack x parameter refined to 0.006(9). This assignment was confirmed by use of the Hooft y-parameter<sup>7</sup>, which refined to 0.013(5).

The function,  $\Sigma w(|F_o|2 - |F_c|2)^2$ , was minimized, where  $w = 1/[(\sigma(F_o))^2 + (0.0221 * P)^2]$  and  $P = (|F_o|2 + 2|F_c|2)/3$ .  $R_w(F^2)$  refined to 0.0506, with R(F) equal to 0.0271 and a goodness of fit, S, = 1.01. Definitions used for calculating R(F),  $R_w(F^2)$  and the goodness of fit, S, are given below.<sup>8</sup> The data were checked for secondary extinction but no correction was necessary. Neutral atom scattering factors and values used to calculate the linear absorption coefficient are from the International Tables for X-ray Crystallography (1992).<sup>9</sup> All figures were generated using SHELXTL/PC.<sup>5</sup> Tables of positional and thermal parameters, bond lengths and angles, torsion angles and figures are found elsewhere.

**Table 1. Crystal data and structure refinement for 5c.**

|                                 |                                             |                             |
|---------------------------------|---------------------------------------------|-----------------------------|
| Empirical formula               | C11 H15 Br O2                               |                             |
| Formula weight                  | 259.14                                      |                             |
| Temperature                     | 100(2) K                                    |                             |
| Wavelength                      | 0.71073 Å                                   |                             |
| Crystal system                  | monoclinic                                  |                             |
| Space group                     | P 21                                        |                             |
| Unit cell dimensions            | a = 5.7323(12) Å                            | $\alpha = 90^\circ$ .       |
|                                 | b = 7.920(2) Å                              | $\beta = 98.524(6)^\circ$ . |
|                                 | c = 12.149(2) Å                             | $\gamma = 90^\circ$ .       |
| Volume                          | 545.5(2) Å <sup>3</sup>                     |                             |
| Z                               | 2                                           |                             |
| Density (calculated)            | 1.578 Mg/m <sup>3</sup>                     |                             |
| Absorption coefficient          | 3.740 mm <sup>-1</sup>                      |                             |
| F(000)                          | 264                                         |                             |
| Crystal size                    | 0.384 x 0.272 x 0.084 mm                    |                             |
| Theta range for data collection | 3.081 to 33.184°.                           |                             |
| Index ranges                    | -8 ≤ h ≤ 8, -12 ≤ k ≤ 12, -17 ≤ l ≤ 18      |                             |
| Reflections collected           | 24040                                       |                             |
| Independent reflections         | 3850 [R(int) = 0.0432]                      |                             |
| Completeness to theta = 25.242° | 99.6 %                                      |                             |
| Absorption correction           | Semi-empirical from equivalents             |                             |
| Max. and min. transmission      | 1.00 and 0.700                              |                             |
| Refinement method               | Full-matrix least-squares on F <sup>2</sup> |                             |
| Data / restraints / parameters  | 3850 / 1 / 137                              |                             |
| Goodness-of-fit on F2           | 1.006                                       |                             |
| Final R indices [I > 2σ(I)]     | R1 = 0.0271, wR2 = 0.0487                   |                             |
| R indices (all data)            | R1 = 0.0366, wR2 = 0.0506                   |                             |
| Absolute structure parameter    | 0.006(9)                                    |                             |
| Extinction coefficient          | n/a                                         |                             |
| Largest diff. peak and hole     | 0.666 and -0.452 e.Å <sup>-3</sup>          |                             |

**Table 2. Atomic coordinates (  $\times 10^4$ ) and equivalent isotropic displacement parameters ( $\text{\AA}^2 \times 10^3$ ) for 3m. U(eq) is defined as one third of the trace of the orthogonalized  $U^{ij}$  tensor.**

|     | x        | y        | z       | U(eq) |
|-----|----------|----------|---------|-------|
| C1  | 8039(4)  | 5546(3)  | 3656(2) | 14(1) |
| C2  | 8445(4)  | 4948(3)  | 2624(2) | 15(1) |
| C3  | 6838(4)  | 3832(3)  | 2054(2) | 14(1) |
| C4  | 4841(4)  | 3314(3)  | 2492(2) | 12(1) |
| C5  | 4472(4)  | 3944(3)  | 3523(2) | 14(1) |
| C6  | 6072(4)  | 5061(3)  | 4110(2) | 15(1) |
| C7  | 3115(3)  | 2064(5)  | 1870(1) | 13(1) |
| C8  | 4239(4)  | 335(3)   | 1754(2) | 14(1) |
| C9  | 2425(4)  | -909(3)  | 1157(2) | 14(1) |
| C10 | 3389(4)  | -2686(3) | 1082(2) | 16(1) |
| C11 | 5293(6)  | -338(3)  | 2897(2) | 33(1) |
| O1  | 2288(3)  | 2826(2)  | 807(1)  | 18(1) |
| O2  | 1669(3)  | -3674(2) | 387(1)  | 19(1) |
| Br1 | 10228(1) | 7057(1)  | 4472(1) | 21(1) |

**Table 3. Bond lengths [Å] and angles [°] for 5c.**

---

|           |            |
|-----------|------------|
| C1-C6     | 1.382(3)   |
| C1-C2     | 1.391(3)   |
| C1-Br1    | 1.903(2)   |
| C2-C3     | 1.386(3)   |
| C2-H2     | 0.95       |
| C3-C4     | 1.394(3)   |
| C3-H3     | 0.95       |
| C4-C5     | 1.393(3)   |
| C4-C7     | 1.519(3)   |
| C5-C6     | 1.392(3)   |
| C5-H5     | 0.95       |
| C6-H6     | 0.95       |
| C7-O1     | 1.441(3)   |
| C7-C8     | 1.529(4)   |
| C7-H7     | 1.00       |
| C8-C11    | 1.526(3)   |
| C8-C9     | 1.534(3)   |
| C8-H8     | 1.00       |
| C9-C10    | 1.520(3)   |
| C9-H9A    | 0.99       |
| C9-H9B    | 0.99       |
| C10-O2    | 1.432(3)   |
| C10-H10A  | 0.99       |
| C10-H10B  | 0.99       |
| C11-H11A  | 0.98       |
| C11-H11B  | 0.98       |
| C11-H11C  | 0.98       |
| O1-H1O    | 0.81(3)    |
| O2-H5O    | 0.78(3)    |
| C6-C1-C2  | 121.36(19) |
| C6-C1-Br1 | 118.75(16) |
| C2-C1-Br1 | 119.89(17) |
| C3-C2-C1  | 118.7(2)   |

|             |            |
|-------------|------------|
| C3-C2-H2    | 120.7      |
| C1-C2-H2    | 120.7      |
| C2-C3-C4    | 121.31(19) |
| C2-C3-H3    | 119.3      |
| C4-C3-H3    | 119.3      |
| C5-C4-C3    | 118.72(19) |
| C5-C4-C7    | 120.38(19) |
| C3-C4-C7    | 120.89(17) |
| C6-C5-C4    | 120.8(2)   |
| C6-C5-H5    | 119.6      |
| C4-C5-H5    | 119.6      |
| C1-C6-C5    | 119.1(2)   |
| C1-C6-H6    | 120.4      |
| C5-C6-H6    | 120.4      |
| O1-C7-C4    | 106.0(2)   |
| O1-C7-C8    | 112.30(18) |
| C4-C7-C8    | 112.18(17) |
| O1-C7-H7    | 108.7      |
| C4-C7-H7    | 108.7      |
| C8-C7-H7    | 108.7      |
| C11-C8-C7   | 110.12(17) |
| C11-C8-C9   | 110.78(18) |
| C7-C8-C9    | 110.71(17) |
| C11-C8-H8   | 108.4      |
| C7-C8-H8    | 108.4      |
| C9-C8-H8    | 108.4      |
| C10-C9-C8   | 113.33(17) |
| C10-C9-H9A  | 108.9      |
| C8-C9-H9A   | 108.9      |
| C10-C9-H9B  | 108.9      |
| C8-C9-H9B   | 108.9      |
| H9A-C9-H9B  | 107.7      |
| O2-C10-C9   | 108.45(17) |
| O2-C10-H10A | 110.0      |
| C9-C10-H10A | 110.0      |

|               |        |
|---------------|--------|
| O2-C10-H10B   | 110.0  |
| C9-C10-H10B   | 110.0  |
| H10A-C10-H10B | 108.4  |
| C8-C11-H11A   | 109.5  |
| C8-C11-H11B   | 109.5  |
| H11A-C11-H11B | 109.5  |
| C8-C11-H11C   | 109.5  |
| H11A-C11-H11C | 109.5  |
| H11B-C11-H11C | 109.5  |
| C7-O1-H1O     | 110(2) |
| C10-O2-H5O    | 111(2) |



**Table 4. Anisotropic displacement parameters ( $\text{\AA}^2 \times 10^3$ ) for 5c. The anisotropic displacement factor exponent takes the form:  $-2p^2 [ h^2 a^* U^{11} + \dots + 2 h k a^* b^* U^{12} ]$**

|     | U <sup>11</sup> | U <sup>22</sup> | U <sup>33</sup> | U <sup>23</sup> | U <sup>13</sup> | U <sup>12</sup> |
|-----|-----------------|-----------------|-----------------|-----------------|-----------------|-----------------|
| C1  | 12(1)           | 9(1)            | 17(1)           | -2(1)           | -6(1)           | 0(1)            |
| C2  | 11(1)           | 16(1)           | 18(1)           | 0(1)            | 1(1)            | 0(1)            |
| C3  | 17(1)           | 13(1)           | 12(1)           | -3(1)           | 2(1)            | 2(1)            |
| C4  | 11(1)           | 9(1)            | 14(1)           | 0(1)            | -2(1)           | 2(1)            |
| C5  | 14(1)           | 12(1)           | 16(1)           | 1(1)            | 2(1)            | 1(1)            |
| C6  | 16(1)           | 16(1)           | 11(1)           | -2(1)           | 0(1)            | 3(1)            |
| C7  | 13(1)           | 11(1)           | 14(1)           | -2(1)           | -2(1)           | -2(1)           |
| C8  | 15(1)           | 9(1)            | 15(1)           | 0(1)            | -4(1)           | 1(1)            |
| C9  | 15(1)           | 10(1)           | 17(1)           | -2(1)           | -3(1)           | 0(1)            |
| C10 | 15(1)           | 14(2)           | 19(1)           | 0(1)            | -4(1)           | -1(1)           |
| C11 | 51(2)           | 14(1)           | 26(1)           | 1(1)            | -23(1)          | -2(1)           |
| O1  | 20(1)           | 10(1)           | 20(1)           | 3(1)            | -11(1)          | -2(1)           |
| O2  | 21(1)           | 7(1)            | 25(1)           | -2(1)           | -9(1)           | 0(1)            |
| Br1 | 16(1)           | 18(1)           | 26(1)           | -8(1)           | -6(1)           | -2(1)           |

**Table 5. Hydrogen coordinates (  $\times 10^4$ ) and isotropic displacement parameters ( $\text{\AA}^2 \times 10^3$ ) for 5c.**

|      | x        | y         | z       | U(eq) |
|------|----------|-----------|---------|-------|
| H2   | 9796     | 5298      | 2317    | 18    |
| H3   | 7103     | 3412      | 1351    | 17    |
| H5   | 3113     | 3607      | 3829    | 17    |
| H6   | 5813     | 5484      | 4814    | 18    |
| H7   | 1748     | 1925      | 2287    | 16    |
| H8   | 5541     | 470       | 1297    | 16    |
| H9A  | 1043     | -950      | 1558    | 17    |
| H9B  | 1876     | -487      | 396     | 17    |
| H10A | 4880     | -2653     | 762     | 20    |
| H10B | 3718     | -3194     | 1833    | 20    |
| H11A | 4023     | -570      | 3334    | 50    |
| H11B | 6367     | 506       | 3283    | 50    |
| H11C | 6164     | -1381     | 2807    | 50    |
| H1O  | 1210(50) | 2280(50)  | 490(20) | 33(8) |
| H5O  | 1900(60) | -4640(40) | 480(30) | 32(9) |

**Table 6. Torsion angles [°] for 5c.**

---

|               |             |
|---------------|-------------|
| C6-C1-C2-C3   | -0.6(3)     |
| Br1-C1-C2-C3  | 179.19(16)  |
| C1-C2-C3-C4   | 0.3(3)      |
| C2-C3-C4-C5   | 0.1(3)      |
| C2-C3-C4-C7   | -178.8(2)   |
| C3-C4-C5-C6   | -0.4(3)     |
| C7-C4-C5-C6   | 178.6(2)    |
| C2-C1-C6-C5   | 0.3(3)      |
| Br1-C1-C6-C5  | -179.43(16) |
| C4-C5-C6-C1   | 0.2(3)      |
| C5-C4-C7-O1   | 122.3(2)    |
| C3-C4-C7-O1   | -58.8(3)    |
| C5-C4-C7-C8   | -114.8(2)   |
| C3-C4-C7-C8   | 64.1(3)     |
| O1-C7-C8-C11  | 174.6(2)    |
| C4-C7-C8-C11  | 55.3(3)     |
| O1-C7-C8-C9   | -62.6(2)    |
| C4-C7-C8-C9   | 178.12(17)  |
| C11-C8-C9-C10 | -53.8(3)    |
| C7-C8-C9-C10  | -176.23(19) |
| C8-C9-C10-O2  | -172.37(17) |

---

**Table 7. Hydrogen bonds for 5c [Å and °].**

| D-H...A       | d(D-H)  | d(H...A) | d(D...A) | <(DHA) |
|---------------|---------|----------|----------|--------|
| O1-H1O...O2#1 | 0.81(3) | 1.98(3)  | 2.772(2) | 170(4) |
| O2-H5O...O1#2 | 0.78(3) | 2.05(3)  | 2.832(2) | 175(3) |

Symmetry transformations used to generate equivalent atoms:

#1 -x,y+1/2,-z #2 x,y-1,z

**Figure 1.** View of **5c** showing the atom labeling scheme. Displacement ellipsoids are scaled to the 50% probability level.

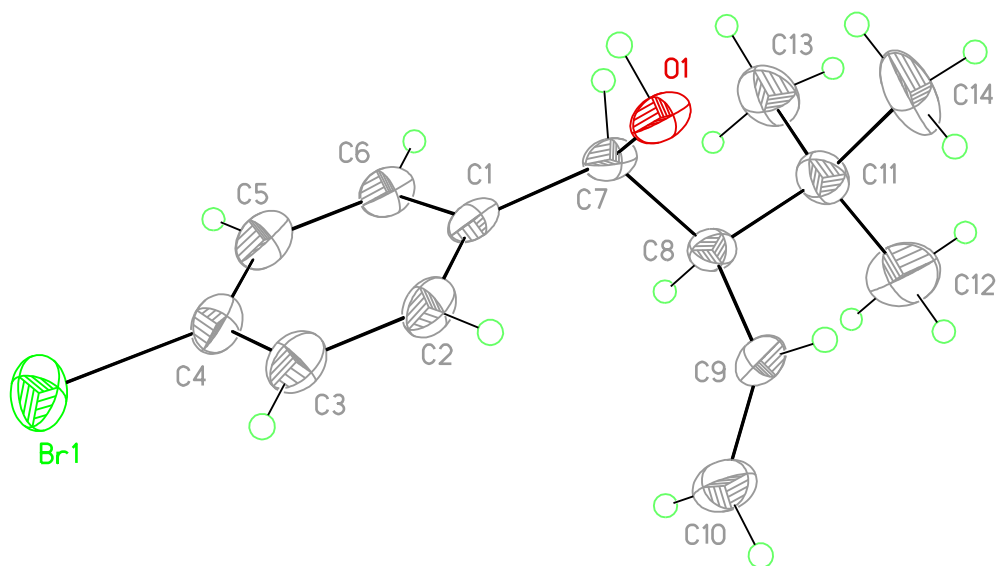

## H. Isotopic Labeling Studies

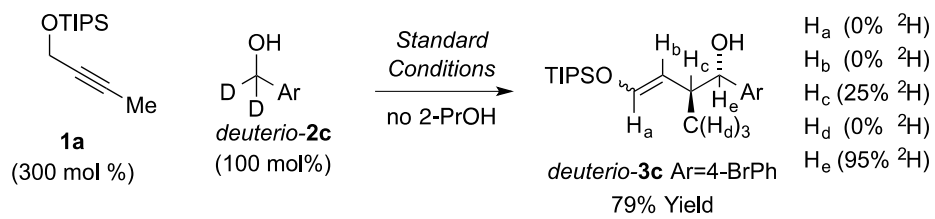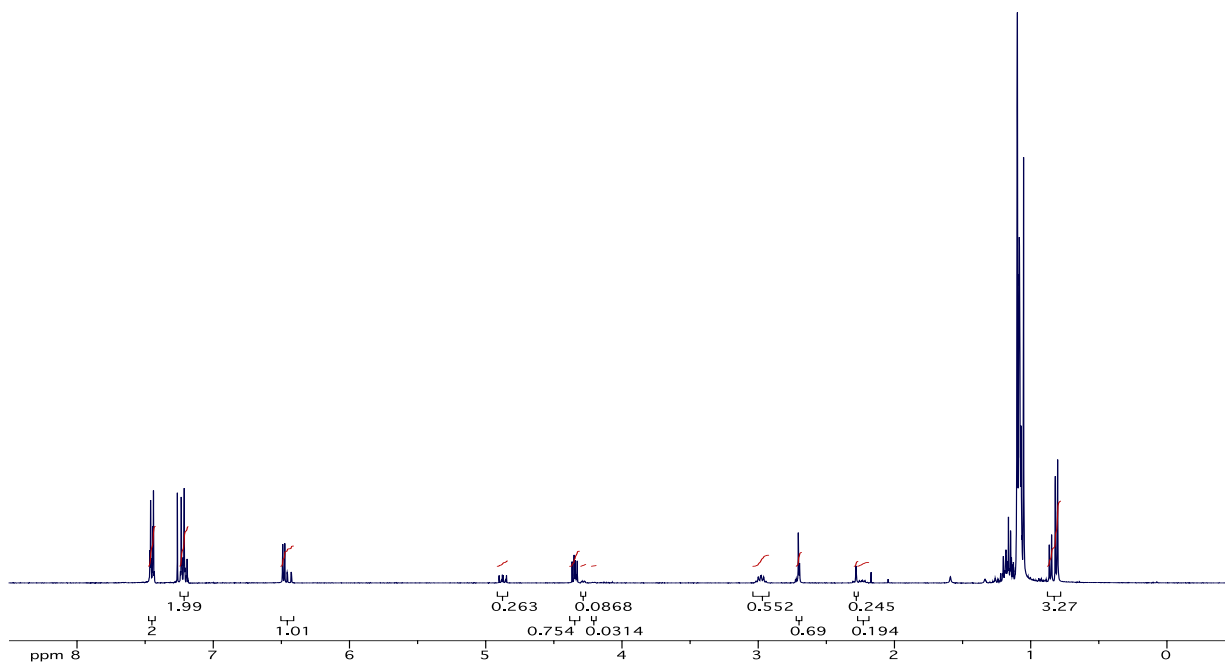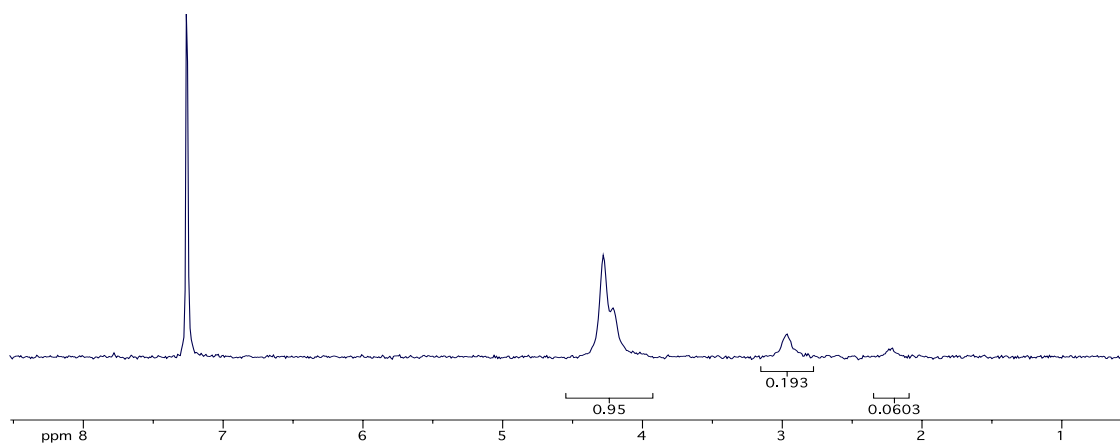

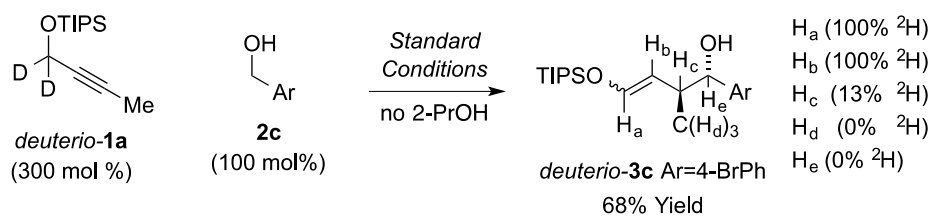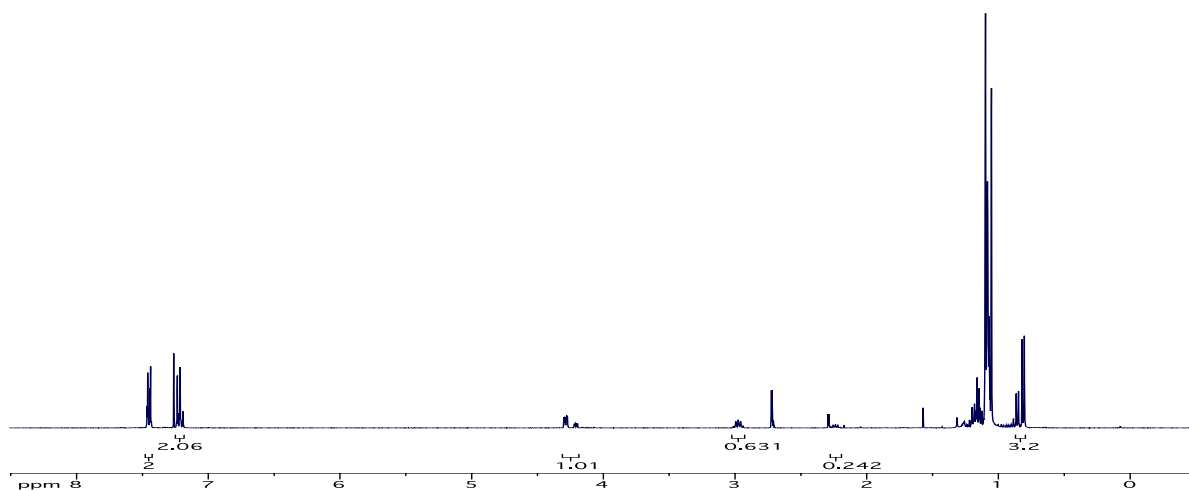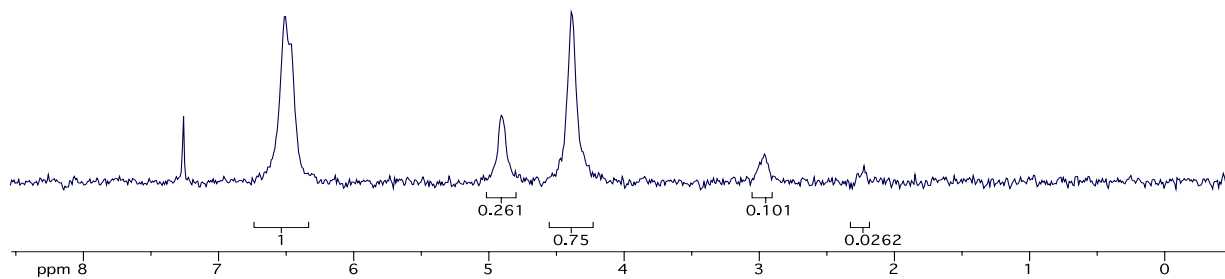

### Reference:

1. SAINT V8.27B Bruker AXS Inc, (2012), Madison, WI.
2. Palatinus, L.; Chapuis, G. *J. Appl. Cryst.* **2007**, *40*, 786.
3. Sheldrick, G. M. SHELXL-2013. Program for the Refinement of Crystal Structures. *Acta Cryst A.* **2008**, *64*, 112.
4. Spek, A. L. (1998). PLATON, A Multipurpose Crystallographic Tool. Utrecht University, The Netherlands.
5. Farrugia, L. J. WinGX 1.64. An Integrated System of Windows Programs for the Solution, Refinement and Analysis of Single Crystal X-ray Diffraction Data. *J. Appl. Cryst.* **1999**, *32*, 837.
6. Flack, H. D. *Acta Cryst A.* **1983**, *39*, 876.
7. Hooft, R. W. W.; Straver, L. H.; Spek, A. L. *J. Appl. Cryst.* **2008**, *41*, 96.
8.  $R_w(F^2) = \{\Sigma w(|F_o|^2 - |F_c|^2)^2 / \Sigma w(|F_o|^4)\}^{1/2}$  where w is the weight given each reflection.  $R(F) = \Sigma(|F_o| - |F_c|) / \Sigma|F_o|$  for reflections with  $F_o > 4(\sigma(F_o))$ .  $S = [\Sigma w(|F_o|^2 - |F_c|^2)^2 / (n - p)]^{1/2}$ , where n is the number of reflections and p is the number of refined parameters.
9. International Tables for X-ray Crystallography (1992). Vol. C, Tables 4.2.6.8 and 6.1.1.4, A. J. C. Wilson, editor, Boston: Kluwer Academic Press.
